# Supplementary material for: This Déjà Vu Feeling—Analysis of Multidomain Protein Evolution in Eukaryotic Genomes
Source: PLoS Comput Biol. 2012 Nov 15;8(11):e1002701. doi: 10.1371/journal.pcbi.1002701 (PMC3499355; doi:10.1371/journal.pcbi.1002701)
Supplement: Table S1 — Genomes analyzed. (XLS) [file pcbi.1002701.s007.xls]

## Sheet: Sheet1
Species	Code	Common Name	Lineage	Source	Download	Version	Assembly/date	File	Link
Metazoa
Acyrthosiphon pisum	ACYPI	pea aphid	Ecdysozoa/Arthropoda/Insecta	Baylor	2010-05-07	Acyr_1.0 ()	NCBI Build 1	protein.fa.gz	ftp://ftp.ncbi.nlm.nih.gov/genomes/Acyrthosiphon_pisum/protein/
Aedes aegypti	AEDAE	Yellowfever mosquito	Ecdysozoa/Arthropoda/Insecta	Ensembl	2007-07-12	rel 45		Aedes_aegypti.AaegL1.45.pep.all.fa	http://www.ensembl.org/info/data/download.html
Amphimedon queenslandica	AMPQU	Sponge	Porifera	JGI	2010-08-12	v1	v1	Aqueenslandica_v1.pep.fasta	ftp://ftp.jgi-psf.org/pub/JGI_data/Amphimedon_queenslandica/annotation/
Anolis carolinensis	ANOCA	Green anole	Vertebrata/Amniota	Broad Institute of Harvard and MIT	2010-05-07	rel 57		Anolis_carolinensis.AnoCar1.0.57.pep.all.fa.gz	ftp://ftp.ensembl.org/pub/current_fasta/anolis_carolinensis/pep/
Anopheles gambiae	ANOGA	African malaria mosquito	Ecdysozoa/Arthropoda/Insecta	Ensembl	2007-07-12	rel 45		Anopheles_gambiae.AgamP3.45.pep.all.fa	http://www.ensembl.org/info/data/download.html
Apis mellifera	APIME	Honeybee	Ecdysozoa/Arthropoda/Insecta	HGSC at Baylor College of Medicine	2007-11-16	Release1 of the OGS		Amel_release1_OGS_pep.fa	http://genomes.tamu.edu/downloadFASTA.html
Bombyx mori	BOMMO	Silk moth	Ecdysozoa/Arthropoda/Insecta	Beijing Genomics Institute	2007-11-16			SW_ge2k_BGF.pep	http://silkworm.genomics.org.cn/jsp/download.jsp
Bos taurus	BOVIN	Cow	Vertebrata/Mammalia	Ensembl	2010-05-21	rel 57		Bos_taurus.Btau_4.0.57.pep.all.fa.gz	ftp://ftp.ensembl.org/pub/current_fasta/bos_taurus/pep/
Branchiostoma floridae	BRAFL	Florida lancelet, Amphioxus	Cephalochordata	JGI	2007-07-12	1	v.1.0 (March 2006)	Brafl1.fasta	http://genome.jgi-psf.org/Brafl1/Brafl1.home.html
Brugia malayi	BRUMA	Filarial nematode worm	Ecdysozoa/Nematoda	Wormbase	2009-11-12	1	9/29/2007	bma1.pep.fa.gz	ftp://ftp.wormbase.org/pub/wormbase/genomes/b_malayi/sequences/protein/
Caenorhabditis briggsae	CAEBR	Roundworm	Ecdysozoa/Nematoda	Wormbase	2009-11-12	206	8/29/2009	brigpep.WS206.fa.gz	ftp://ftp.sanger.ac.uk/pub/wormbase/cbriggsae/cb25.agp8
Caenorhabditis elegans	CAEEL	Roundworm	Ecdysozoa/Nematoda	Ensembl	2007-07-12	rel 45		Caenorhabditis_elegans.WB170.45.pep.all.fa	http://www.ensembl.org/info/data/download.html
Canis familiaris	CANFA	Dog	Vertebrata/Mammalia	Ensembl	2010-05-07	rel 57		Canis_familiaris.BROADD2.57.pep.all.fa.gz	ftp://ftp.ensembl.org/pub/current_fasta/canis_familiaris/pep/
Capitella telata	CAPTE	Bristle worm	Lophotrochozoa/Annelida	JGI	2007-08-28	1	v.1.0 (October 2006)	CAP_FilteredModelsv1.0.aa.fasta	http://genome.jgi-psf.org/Capca1/Capca1.download.ftp.html
Cavia porcellus	CAVPO	Guinea pig	Vertebrata/Mammalia	Ensembl	2010-05-07	rel 57		Cavia_porcellus.cavPor3.57.pep.all.fa.gz	ftp://ftp.ensembl.org/pub/current_fasta/cavia_porcellus/pep/
Ciona intestinalis	CIOIN	Transparent sea squirt	Urochordata/Ascidiacea	Ensembl	2010-05-07	rel 57		Ciona_intestinalis.JGI2.57.pep.all.fa.gz	ftp://ftp.ensembl.org/pub/current_fasta/ciona_intestinalis/pep/
Ciona savignyi	CIOSA	Pacific transparent sea squirt	Urochordata/Ascidiacea	Ensembl	2010-05-07	rel 57		Ciona_savignyi.CSAV2.0.57.pep.all.fa.gz	ftp://ftp.ensembl.org/pub/current_fasta/ciona_savignyi/pep/
Culex pipiens	CULPI	House mosquito	Ecdysozoa/Arthropoda/Insecta	Broad Institute of Harvard and MIT	2008-01-18		39434	culex_pipiens_3_proteins.fasta.gz	http://www.broad.mit.edu/annotation/genome/culex_pipiens/Downloads.html
Danio rerio	DANRE	Zebrafish	Vertebrata/Euteleostei	Ensembl	2010-05-07	rel 57		Danio_rerio.Zv8.57.pep.all.fa.gz	ftp://ftp.ensembl.org/pub/current_fasta/danio_rerio/pep/
Daphnia pulex	DAPPU	Water flea	Ecdysozoa/Arthropoda/Crustacea	JGI	2007-07-12	1	v.1.0 (September 2006)	DAPPU_FrozenGeneCatalog_2007_07_03.aa.fasta	http://genome.jgi-psf.org/Dappu1/Dappu1.home.html
Drosophila melanogaster	DROME	Fruit fly	Ecdysozoa/Arthropoda/Insecta	Ensembl	2010-05-07	rel 57		Drosophila_melanogaster.BDGP5.13.57.pep.all.fa.gz	ftp://ftp.ensembl.org/pub/current_fasta/drosophila_melanogaster/pep/
Felis catus	FELCA	Cat	Vertebrata/Mammalia	Ensembl	2010-05-14	rel 57		Felis_catus.CAT.57.pep.all.fa.gz	ftp://ftp.ensembl.org/pub/current_fasta/felis_catus/pep/
Gallus gallus	CHICK	Chicken	Vertebrata/Amniota	Ensembl	2010-05-07	rel 57		Gallus_gallus.WASHUC2.57.pep.all.fa.gz	ftp://ftp.ensembl.org/pub/current_fasta/gallus_gallus/pep/
Gasterosteus aculeatus	GASAC	Three-spined stickleback	Vertebrata/Euteleostei	Ensembl	2010-05-07	rel 57		Gasterosteus_aculeatus.BROADS1.57.pep.all.fa.gz	ftp://ftp.ensembl.org/pub/current_fasta/gasterosteus_aculeatus/pep/
Helobdella robusta	HELRO	Californian leech	Lophotrochozoa/Annelida	JGI	22.09.07	1	v.1.0 (July 2007)	proteins.Helro1_FilteredModels3.fasta	http://genome.jgi-psf.org/Helro1/Helro1.download.ftp.html
Homo sapiens	HUMAN	Human	Vertebrata/Mammalia	Ensembl	2010-05-07	rel 57		Homo_sapiens.GRCh37.57.pep.all.fa.gz	ftp://ftp.ensembl.org/pub/current_fasta/homo_sapiens/pep/
Hydra magnipapillata	HYDMA	Freshwater polyp	Cnidaria	JCVI	2010-05-07	1 (1/26/2009)	NCBI Build 1	protein.fa.gz	ftp://ftp.ncbi.nlm.nih.gov/genomes/Hydra_magnipapillata/protein/
Ixodes scapularis	IXOSC	Black-legged tick	Ecdysozoa/Arthropoda/Chelicerata	VectorBase	2010-05-19	1.1		iscapularis.PEPTIDES-IscaW1.1.fa.gz	http://iscapularis.vectorbase.org/GetData/Downloads?type=Geneset
Lottia gigantea	LOTGI	Owl limpet	Lophotrochozoa/Mollusca	JGI	2007-07-29	1	v.1.0 (08/24/2006)	Lotgi1_GeneModels_FilteredModels1_aa.fasta	http://genome.jgi-psf.org/Lotgi1/Lotgi1.download.ftp.html
Monodelphis domestica	MONDO	Short-tailed gray opossum	Vertebrata/Mammalia	Ensembl	2010-05-07	rel 57		Monodelphis_domestica.BROADO5.57.pep.all.fa.gz	ftp://ftp.ensembl.org/pub/current_fasta/monodelphis_domestica/
Mus musculus	MOUSE	Mouse	Vertebrata/Mammalia	Ensembl	2010-05-07	rel 57		Mus_musculus.NCBIM37.57.pep.all.fa.gz	ftp://ftp.ensembl.org/pub/current_fasta/mus_musculus/pep/
Nasonia vitripennis	NASVI	Parasitic wasp	Ecdysozoa/Arthropoda/Insecta	HGSC at Baylor College of Medicine	2008-01-29	1.0	12 September 2007	protein.fa.gz	ftp://ftp.ncbi.nlm.nih.gov/genomes/Nasonia_vitripennis/protein
Nematostella vectensis	NEMVE	Starlet sea anemone	Cnidaria	JGI	2007-07-12	1		Nemve1FilteredModels1.fasta	http://genome.jgi-psf.org/Nemve1/Nemve1.home.html
Oikopleura dioica	OIKDI	Tunicate	Urochordata/Appendicularia	Genoscope/Sars centre/MPIMG	2008-11-14	1	26-Mar-2008	Oikopleura_dioica.SNAP.Od.fasta	http://www.genoscope.cns.fr/externe/Download/Projets/Projet_HG/data/annotation/
Ornithorhynchus anatinus	ORNAN	Duckbill platypus	Vertebrata/Mammalia	Ensembl	2010-05-07	rel 57		Ornithorhynchus_anatinus.OANA5.57.pep.all.fa.gz	ftp://ftp.ensembl.org/pub/current_fasta/ornithorhynchus_anatinus/pep/
Oryzias latipes	ORYLA	Japanese ricefish	Vertebrata/Euteleostei	Ensembl	2010-05-07	rel 57		Oryzias_latipes.MEDAKA1.57.pep.all.fa.gz	ftp://ftp.ensembl.org/pub/current_fasta/oryzias_latipes/pep/
Pan troglodytes	PANTR	Chimpanzee	Vertebrata/Mammalia	Ensembl	2010-05-07	rel 57		Pan_troglodytes.CHIMP2.1.57.pep.all.fa.gz	ftp://ftp.ensembl.org/pub/current_pan_troglodytes/data/fasta/pep/
Pristionchus pacificus	PRIPA	Roundworm	Ecdysozoa/Nematoda	Wormbase	2009-11-12	205	7/30/2009	ppapep.WS205.fa.gz	ftp://ftp.wormbase.org/pub/wormbase/genomes/p_pacificus/sequences/protein/
Rattus norvegicus	RAT	Rat	Vertebrata/Mammalia	Ensembl	2010-05-07	rel 57		Rattus_norvegicus.RGSC3.4.57.pep.all.fa.gz	ftp://ftp.ensembl.org/pub/current_fasta/rattus_norvegicus/pep/
Saccoglossus kowalevskii	SACKO	Acorn worm	Deuterostomia/Hemichordata	Baylor	2010-10-29	NCBI Build No 1 Ver 1	27 July 2010	protein.fa.gz (annotated proteins)	ftp://ftp.ncbi.nlm.nih.gov/genomes/Saccoglossus_kowalevskii/protein/
Schistosoma mansoni	SCHMA	Blood fluke	Lophotrochozoa/Platyhelminthes	TIGR	2007-11-07		5/14/2007	Smansoni_preliminary_annotation.pep.gz	ftp://ftp.tigr.org/pub/data/Eukaryotic_Projects/s_mansoni/preliminary_annotation
Strongylocentrotus purpuratus	STRPU	Purple sea urchin	Echinodermata	HGSC at Baylor College of Medicine	2007-09-05		03/09/2007	STRPU_GLEAN3.fa	ftp://ftp.hgsc.bcm.tmc.edu/pub/data/Spurpuratus/fasta/Annotation
Taeniopygia guttata	TAEGU	Zebra finch	Vertebrata/Amniota	WashU/Ensembl	2010-05-07	rel 57		Taeniopygia_guttata.taeGut3.2.4.57.pep.all.fa.gz	ftp://ftp.ensembl.org/pub/current_fasta/taeniopygia_guttata/pep/
Takifugu rubripes	FUGRU	Japanese pufferfish	Vertebrata/Euteleostei	Ensembl	2010-05-07	rel 57		Takifugu_rubripes.FUGU4.57.pep.all.fa.gz	ftp://ftp.ensembl.org/pub/current_fasta/takifugu_rubripes/pep/
Tetraodon nigroviridis	TETNG	Green puffer	Vertebrata/Euteleostei	Ensembl	2010-05-07	rel 57		Tetraodon_nigroviridis.TETRAODON8.57.pep.all.fa.gz	ftp://ftp.ensembl.org/pub/current_fasta/tetraodon_nigroviridis/pep/
Tribolium castaneum	TRICA	Red flour beetle	Ecdysozoa/Arthropoda/Insecta	BeetleBase	2009-11-06	3.0	2/10/2009	TRICA_peptide.fa	ftp://bioinformatics.ksu.edu/pub/BeetleBase/3.0/Sequences/Tribolium_Official_Gene_Sequences/
Trichoplax adhaerens	TRIAD		Placozoa	JGI	2007-10-01	1	v1.0 (30 August 2006)	Triad1_best_proteins.fasta	http://genome.jgi-psf.org/Triad1/Triad1.download.ftp.html
Xenopus tropicalis	XENTR	Western clawed frog	Vertebrata/Amphibia	Ensembl	2009-11-06	rel 57		Xenopus_tropicalis.JGI4.1.57.pep.all.fa.gz	ftp://ftp.ensembl.org/pub/current_fasta/xenopus_tropicalis/pep/
Choanoflagellates
Monosiga brevicollis	MONBE	Choanoflagellate	Choanoflagellida	JGI	2007-07-12	1	v.1.0 (July 2006)	Monbr1_best_proteins.fasta	http://genome.jgi-psf.org/Monbr1/Monbr1.home.html
Salpingoeca rosetta/Proterospongia sp. ATCC 50818	SALROS		Choanoflagellida	BROAD	2010-12-02			salpingoeca_rosetta_1_proteins.fasta.gz	http://www.broadinstitute.org/annotation/genome/multicellularity_project/MultiDownloads.html
Filasterea
Capsaspora owczarzaki	CAPOWC		Ichthyosporea	BROAD	2010-12-02			capsaspora_owczarzaki_atcc_30864_1_proteins.fasta.gz	http://www.broadinstitute.org/annotation/genome/multicellularity_project/MultiDownloads.html
Fungi
Acremonium alcalophilum	ACRALC		Ascomycota/Sordariomycetes	JGI	2011-04-08		1	Acral1_c3a_GeneCatalog_proteins_20100903.aa.fasta.gz	http://genome.jgi-psf.org/pages/dynamicOrganismDownload.jsf?organism=Acral1_c3a
Agaricus bisporus var. burnettii JB137-S8	AGABB		Basidiomycota/Homobasidiomycetes	JGI	2010-05-19	2.0		Abisporus_varburnettii.v2.FilteredModels1.proteins.fasta.gz	http://genome.jgi-psf.org/Agabi_varbur_1/Agabi_varbur_1.download.ftp.html
Allomyces macrogynus	ALLMA		Blastocladiomycota	BROAD	2010-12-02			allomyces_macrogynus_atcc_38327_3_proteins.fasta.gz + allomyces_macrogynus_atcc_38327_mitochondria_1_proteins.fasta.gz	http://www.broadinstitute.org/annotation/genome/multicellularity_project/MultiDownloads.html
Ashbya gossypii	ASHGO		Ascomycota/Saccharomycotina	University of Basel	2007-11-07	AGD version 3		982.A_gossypii.fasta.gz	http://www.ebi.ac.uk/integr8/FtpSearch.do?orgProteomeId=982
Aspergillus flavus	ASPFL		Ascomycota/Eurotiales	BROAD	2008-01-02	2			http://www.broad.mit.edu/annotation/genome/aspergillus_group/MultiDownloads.html
Aspergillus niger	ASPNG	Black mold	Ascomycota/Eurotiales	BROAD	2008-01-02	1			http://www.broad.mit.edu/annotation/genome/aspergillus_group/MultiDownloads.html
Candida albicans WO-1	CANAL		Ascomycota/Saccharomycotina	BROAD	2007-11-02	1 (05/07/2007)		candida_albicans_wo1_1_proteins.fasta	http://www.broad.mit.edu/annotation/genome/candida_albicans/Downloads.html
Candida tropicalis	CANTR		Ascomycota/Saccharomycotina	BROAD	2008-01-02	3 (05/23/2006)		candida_tropicalis_3_proteins.fasta.gz	http://www.broad.mit.edu/annotation/genome/candida_tropicalis/Downloads.html
Ceriporiopsis subvermispora B	CERSU		Basidiomycota/Homobasidiomycetes	JGI	2010-12-02	40514	v 1.0 (July 15, 2010)	Ceriporiopsis_subvermispora.proteins.fasta.gz	http://genome.jgi-psf.org/Cersu1/Cersu1.download.ftp.html
Chaetomium globosum	CHAGB	Soil fungus	Ascomycota/Sordariomycetes	BROAD	2007-11-07	1 (04/26/2006)		chaetomium_globosum_1_proteins.fasta	http://www.broad.mit.edu/annotation/genome/chaetomium_globosum/Downloads.html
Coccidioides immitis RS	COCIM	Valley fever fungus	Ascomycota/Onygenales	BROAD	2008-01-02	2			http://www.broad.mit.edu/annotation/genome/coccidioides_group/MultiDownloads.html
Cochliobolus heterostrophus C5	COCHE		Ascomycota/Dothideomycetes	JGI	2008-07-01	1	v1.0 (December 2007	CocheC5_1_GeneModels_FilteredModels1_aa.fasta.gz	http://genome.jgi-psf.org/CocheC5_1/CocheC5_1.download.ftp.html
Coniophora putean	CONPUT		Basidiomycota/Homobasidiomycetes	JGI	2011-04-08		1	Conpu1_GeneCatalog_proteins_20101116.aa.fasta.gz	http://genome.jgi-psf.org/pages/dynamicOrganismDownload.jsf?organism=Conpu1
Coprinus cinereus	COPCI	Inky cap fungus	Basidiomycota/Homobasidiomycetes	Broad Institute of Harvard and MIT	2007-11-01	1 (05/04/2006)		coprinus_cinereus_1_proteins.fasta	http://www.broad.mit.edu/annotation/genome/coprinus_cinereus/Downloads.html
Cryptococcus neoformans A	CRYNE		Basidiomycota/Tremellomycetes	Broad Institute of Harvard and MIT	2007-11-02	1 (04/26/2006)		cryptococcus_neoformans_1_proteins.fasta	http://www.broad.mit.edu/annotation/genome/cryptococcus_neoformans/Downloads.html
Dichomitus squalens	DICSQU		Basidiomycota/Homobasidiomycetes	JGI	2011-04-08		1	Dicsq1_GeneCatalog_proteins_20101110.aa.fasta.gz	http://genome.jgi-psf.org/pages/dynamicOrganismDownload.jsf?organism=Dicsq1
Dothistroma septosporum NZE10 v1.0/Mycosphaerella pini	MYCPJ		Ascomycota/Dothideomycetes	JGI	2010-12-02	1.0	v 1.0 (September 30, 2010)	Dotse1_GeneCatalog_proteins_20100818.aa.fasta.gz	http://genome.jgi-psf.org/Dotse1/Dotse1.download.ftp.html
Emericella nidulans	EMENI		Ascomycota/Eurotiales	BROAD	2007-07-14	V.1 06/19/2006		aspergillus_nidulans_1_proteins.fasta	http://www.broad.mit.edu/annotation/genome/aspergillus_group/MultiHome.html
Encephalitozoon cuniculi	ENCCU	Microsporidian parasite	Microsporidia	Genoscope	2008-01-29	(7/24/2007)		11 files for 11 chromosomes	ftp://ftp.ncbi.nlm.nih.gov/genomes/Fungi/Encephalitozoon_cuniculi/
Fomitopsis pinicola SS1 v1.0	FOMPIN		Basidiomycota/Homobasidiomycetes	JGI	2010-12-16	1 (12/15/2010)	v 1.0	Fompi1_GeneCatalog_proteins_20101006.aa.fasta.gz	http://genome.jgi-psf.org/Fompi1/Fompi1.download.ftp.html
Gibberella zeae	GIBZE	Wheat head blight fungus	Ascomycota/Sordariomycetes	BROAD	2007-11-07	3			http://www.broad.mit.edu/annotation/genome/fusarium_group/MultiDownloads.html
Gloeophyllum trabeum	GLOTR		Basidiomycota/Homobasidiomycetes	JGI	2010-12-02	1.0	v 1.0 (November 1, 2010)	Glotr1_1_GeneCatalog_proteins_20100921.aa.fasta.gz	http://genome.jgi-psf.org/Glotr1_1/Glotr1_1.download.ftp.html
Heterobasidion annosum	HETAN	Root rot fungus	Basidiomycota/Homobasidiomycetes	JGI	2009-11-27	1	v 1.0 (May 2009)	Hannosum.FilteredModels1.proteins.fasta	http://genome.jgi-psf.org/Hetan1/Hetan1.download.ftp.html
Kluyveromyces lactis	KLULA		Ascomycota/Saccharomycotina	Génolevures	2007-11-01	GL2: 2 (2006/08/17)		Klla-GL2r2.aa	http://cbi.labri.u-bordeaux.fr/Genolevures/download/KLLA_annot.php
Kluyveromyces waltii	KLUWA		Ascomycota/Saccharomycotina	BROAD,SGD	1910-10-19	(Wed Sep 21 2005)		kluyveromyces_waltii.SNAP.aa.gz	http://fungal.genome.duke.edu/annotations/kwal/aa/
Laccaria bicolor	LACBI	Bicoloured deceiver	Basidiomycota/Homobasidiomycetes	JGI	2007-07-12	1	v.1.0 (March 2005)	LACBI_BestModelsv1.aa.fasta	http://genome.jgi-psf.org/Lacbi1/Lacbi1.home.html
Magnaporthe grisea	MAGGR	Rice blast fungus	Ascomycota/Sordariomycetes	BROAD	2007-11-07	5 (05/07/2007)		magnaporthe_grisea_5_proteins.fasta	http://www.broad.mit.edu/annotation/genome/magnaporthe_grisea/Downloads.html
Melampsora laricis-populina	MELLP		Basidiomycota/Pucciniomycotina	JGI	2008-11-17	v1.0	v.1.0 (November 2007)	Mlaricis_populina.FilteredModels3.aa.fasta.gz	http://genome.jgi-psf.org/Mellp1/Mellp1.download.ftp.html
Mucor circinelloides	MUCCI		Mucoromycotina (Zygomycota)	JGI	2010-05-07	2.0		Mucor_circinelloides_v2_filtered_proteins.fasta.gz	http://genome.jgi-psf.org/Mucci2/Mucci2.download.ftp.html
Myceliophthora thermophila(=Sporotrichum thermophile)	MYCTHE		Ascomycota/Sordariomycetes	JGI	2011-04-08		2	Spoth2_GeneCatalog_proteins_20101221.aa.fasta.gz	http://genome.jgi-psf.org/pages/dynamicOrganismDownload.jsf?organism=Spoth2
Mycosphaerella fijiensis	MYCFI		Ascomycota/Dothideomycetes	JGI	2007-11-01	1	v.1.0 (November 2006)	FilteredModelsv1.0.aa.fasta	http://genome.jgi-psf.org/Mycfi1/Mycfi1.download.ftp.html
Mycosphaerella graminicola	MYCGR		Ascomycota/Dothideomycetes	JGI	2007-11-01	1	v.1.0 (Nov 2005)	proteins.FilteredModels1.fasta	http://genome.jgi-psf.org/Mycgr1/Mycgr1.download.ftp.html
Neosartorya fischeri	NEOFI		Ascomycota/Eurotiales	BROAD	2008-01-02	1			http://www.broad.mit.edu/annotation/genome/aspergillus_group/MultiDownloads.html
Neurospora crassa	NEUCR		Ascomycota/Sordariomycetes	BROAD	2007-07-14	V.3 a. 7 05/07/2007		neurospora_crassa_7_proteins.fasta	http://www.broad.mit.edu/annotation/genome/neurospora/Downloads.html
Phaeosphaeria nodorum	PHANO	Glume blotch fungus	Ascomycota/Dothideomycetes	Broad Institute of Harvard and MIT	2007-11-01	1 (3/14/2006)		stagonospora_nodorum_1_proteins.fasta	http://www.broad.mit.edu/annotation/genome/stagonospora_nodorum/Downloads.html
Phycomyces blakesleeanus	PHYBL		Mucoromycotina (Zygomycota)	JGI	2007-08-28	1	v.1.0 (September 2006)	Phybl1_best_proteins.fasta	http://genome.jgi-psf.org/Phybl1/Phybl1.download.ftp.html
Pichia angusta/Hansenula polymorpha NCYC 495 leu1.1/	PICAN		Ascomycota/Saccharomycotina	JGI	2010-12-02	2	v.2.0 (November 17, 2010)	Hanpo2_GeneCatalog_proteins_20100927.aa.fasta.gz	http://genome.jgi-psf.org/Hanpo2/Hanpo2.download.ftp.html
Pleurotus ostreatus	PLEOS	Oyster mushroom	Basidiomycota/Homobasidiomycetes	JGI	2010-05-07	2.0		PleosPC9_1_GeneModels_Filteredmodels2_aa.fasta.gz	http://genome.jgi-psf.org/PleosPC9_1/PleosPC9_1.download.ftp.html
Pneumocystis carinii	PNECA		Ascomycota/Taphrinomycotina	U Cincinnati	2008-01-18	Sep 21 2005		pneumocystis_carnii.SNAP.aa.gz	http://fungal.genome.duke.edu/annotations/pcar/aa/
Postia placenta	POSPL		Basidiomycota/Homobasidiomycetes	JGI	2007-11-01	1	v.1.0 (September 2006)	Pospl1_FilteredModels2_proteins.fasta	http://genome.jgi-psf.org/Pospl1/Pospl1.download.ftp.html
Puccinia graminis	PUCGR	Black stem rust fungus	Basidiomycota/Pucciniomycotina	Broad Institute of Harvard and MIT	2008-01-02	2 (06/06/2007)		puccinia_graminis_f._sp._tritici_2_proteins.fasta.gz	http://www.broad.mit.edu/annotation/genome/puccinia_graminis/Downloads.html
Pyrenophora tritici-repentis	PYRTR		Ascomycota/Dothideomycetes	Broad Institute of Harvard and MIT	2008-05-07	1		pyrenophora_tritici-repentis_1_proteins.fasta.zip	http://www.broad.mit.edu/annotation/genome/pyrenophora_tritici_repentis.3/MultiDownloads.html
Rhizopus oryzae	RHIOR		Mucoromycotina (Zygomycota)	Broad Institute of Harvard and MIT	2007-11-02	3 (04/21/2006)		rhizopus_oryzae_3_proteins.fasta	http://www.broad.mit.edu/annotation/genome/rhizopus_oryzae/Downloads.html
Rhodotorula graminis strain WP1	RHOGR		Basidiomycota/Pucciniomycotina	JGI	2010-12-02	1.1	v 1.1 (November 17, 2010)	Rhoba1_1_GeneCatalog_proteins_20100913.aa.fasta.gz	http://genome.jgi-psf.org/Rhoba1_1/Rhoba1_1.download.ftp.html
Saccharomyces castellii	SACCA	Yeast	Ascomycota/Saccharomycotina	Washington University	2008-01-08	(10/4/2003)		orf_trans.fasta.gz	ftp://genome-ftp.stanford.edu/pub/yeast/sequence/fungal_genomes/S_castellii/WashU/orf_protein/
Saccharomyces cerevisiae	YEAST	Baker's yeast	Ascomycota/Saccharomycotina	Stanford University	2007-07-16	38844		yeast_nrpep.fasta	ftp://genome-ftp.stanford.edu/pub/yeast/sequence/GenBank
Schizosaccharomyces japonicus	SCHJP	Fission yeast	Ascomycota/Taphrinomycotina	Broad Institute of Harvard and MIT	2007-07-14	V.1 2/20/2007		schizosaccharomyces_japonicus_1_proteins.fasta	http://www.broad.mit.edu/annotation/genome/schizosaccharomyces_japonicus/Downloads.html
Schizosaccharomyces pombe	SCHPO	Fission yeast	Ascomycota/Taphrinomycotina	Sanger	2007-07-16	v 19 07/09/2007		pompep.fasta	ftp://ftp.sanger.ac.uk/pub/yeast/pombe/Protein_data/pompep
Septoria musiva SO2202/Mycosphaerella populorum	MYCPOP		Ascomycota/Dothideomycetes	JGI	2010-12-02	1.0	v 1.0 (November 16, 2010)	Sepmu1_GeneCatalog_proteins_20100915.aa.fasta.gz	http://genome.jgi-psf.org/Sepmu1/Sepmu1.download.ftp.html
Serpula lacrymans	SERLA	Dry rot fungus	Basidiomycota/Homobasidiomycetes	JGI	2010-05-14	2.0		Serpula_lacrymans_S7_3_v2.proteins.fasta.gz	http://genome.jgi-psf.org/SerlaS7_3_2/SerlaS7_3_2.download.ftp.html
Spizellomyces punctatus	SPIPN		Chytridiomycota	BROAD	2010-12-02			spizellomyces_punctatus_daom_br117_1_proteins.fasta.gz + spizellomyces_punctatus_daom_br117_1_proteins_mito.fasta.gz	http://www.broadinstitute.org/annotation/genome/multicellularity_project/MultiDownloads.html
Sporobolomyces roseus	SPORO		Basidiomycota/Pucciniomycotina	JGI	2007-08-21	1	v.1.0 (Apr 2006)	Sroseus.FilteredModels1.aa.fasta	http://genome.jgi-psf.org/Sporo1/Sporo1.home.html
Thielavia terrestris	THITER		Ascomycota/Sordariomycetes	JGI	2009-11-27	1	v. 1.0 (September 2009)	Thite1_GeneModels_FilteredModels2_aa.fasta	http://genome.jgi-psf.org/Thite1/Thite1.download.ftp.html
Trametes versicolor	TRAVE		Basidiomycota/Homobasidiomycetes	JGI	2011-04-08		1	Trave1_GeneCatalog_proteins_20101111.aa.fasta.gz	http://genome.jgi-psf.org/pages/dynamicOrganismDownload.jsf?organism=Trave1
Tremella mesenterica	TREME	Jelly fungus	Basidiomycota/Tremellomycetes	JGI	2009-11-27	1	v.1.0 (June 2009)	Treme1_best_proteins.fasta	http://genome.jgi-psf.org/Treme1/Treme1.download.ftp.html
Trichoderma virens	TRIVE		Ascomycota/Sordariomycetes	JGI	2008-01-01	1	v 1.0	proteins.FM3_Trive1.fasta.gz	http://genome.jgi-psf.org/Trive1/Trive1.download.ftp.html
Uncinocarpus reesii	UNCRE		Ascomycota/Onygenales	BROAD	2008-01-02	2 (05/12/2006)		uncinocarpus_reesii_2_proteins.fasta.gz	http://www.broad.mit.edu/annotation/genome/uncinocarpus_reesii/Downloads.html
Ustilago maydis	USTMA	Smut fungus	Basidiomycota/Ustilaginomycotina	Broad Institute of Harvard and MIT	2007-11-02	1 (04/26/2006)		ustilago_maydis_1_proteins.fasta	http://www.broad.mit.edu/annotation/genome/ustilago_maydis/Downloads.html
Wallemia sebi	WALSE		Basidiomycota/Wallemiomycetes	JGI	2010-12-02	1.0	v 1.0 (October 11, 2010)	Walse1_GeneCatalog_proteins_20100910.aa.fasta.gz	http://genome.jgi-psf.org/Walse1/Walse1.download.ftp.html
Wolfiporia cocos MD-104 SS10	WOLCOC		Basidiomycota/Homobasidiomycetes	JGI	2010-12-02	40514	v 1.0 (November 24, 2010)	Wolco1_GeneCatalog_proteins_20100915.aa.fasta.gz	http://genome.jgi-psf.org/Wolco1/Wolco1.download.ftp.html
Yarrowia lipolytica	YARLI		Ascomycota/Saccharomycotina	Génolevures	2007-11-01	GL2: 2 (2006/05/22)		Yali-GL2r2.aa	http://cbi.labri.u-bordeaux.fr/Genolevures/download/YALI_annot.php
Apusozoa
Thecamonas trahens	THETRA		Apusozoa/Apusomonadidae	BROAD	2010-12-02			thecamonas_trahens_atcc_50062_1_proteins.fasta.gz	http://www.broadinstitute.org/annotation/genome/multicellularity_project/MultiDownloads.html
Amoebozoa
Dictyostelium discoideum	DICDI	Slime mold	Mycetozoa	dictyBase/HGSC at Baylor College of Medicine	2007-07-29	39278.1		dicty_primary_protein	http://dictybase.org/db/cgi-bin/dictyBase/download/blast_databases.pl
Dictyostelium purpureum QSDP1	DICPU	Slime mold	Mycetozoa	JGI	2008-09-19	1.0	v1.0 (August 18 2008)	Dicpu1_best_proteins.fasta.gz	http://genome.jgi-psf.org/Dicpu1/Dicpu1.download.ftp.html
Entamoeba histolytica	ENTHI		Entamoebidae	TIGR	2007-11-07	(12/22/2004)		EHA1.pep	ftp://ftp.tigr.org/pub/data/Eukaryotic_Projects/e_histolytica/whole_genome_sequencing/EHA1.pep
Archaeplastida
Aquilegia coerulea	AQUCA	Rocky mountain columbine	Viridiplantae/Embryophyta	JGI	2011-04-11	v6.0	8/26/10	Acoerulea_151_peptide.fa.gz	ftp://ftp.jgi-psf.org/pub/JGI_data/phytozome/v6.0/
Arabidopsis lyrata	ARALY	Lyre-leaved rock-cress	Viridiplantae/Embryophyta	JGI	2008-10-03	v1.0	v1.0 (April 7, 2008)	Araly1_GeneModels_FilteredModels6_aa.fasta	http://genome.jgi-psf.org/Araly1/Araly1.download.ftp.html
Arabidopsis thaliana	ARATH	Mouse-ear cress	Viridiplantae/Embryophyta	TAIR	2007-07-14	TAIR7		TAIR7_pep_20070425	ftp://ftp.arabidopsis.org/home/tair/Genes/TAIR7_genome_release/TAIR7_blastsets
Brachypodium distachyon	BRADI	Purple false brome	Viridiplantae/Embryophyta	JGI	2011-12-04	v6.0	8/30/10	Bdistachyon_114_peptide.fa.gz	ftp://ftp.jgi-psf.org/pub/JGI_data/phytozome/v6.0/
Carica papaya	CARPA	Papaya	Viridiplantae/Embryophyta	JGI	2011-12-04	v6.0	12/13/10	Cpapaya_113_peptide.fa.gz	ftp://ftp.jgi-psf.org/pub/JGI_data/phytozome/v6.0/
Chlamydomonas reinhardtii	CHLRE		Chlorophyta/Chlorophyceae	JGI	2007-07-12	3		Chlre3_1.GeneCatalogProteins.6JUL06.fasta	http://genome.jgi-psf.org/Chlre3/Chlre3.home.html
Chlorella sp. NC64A	CHLSP		Chlorophyta/Trebouxiophyceae	JGI	2008-06-15	1	1.0 (June 13, 2008)	Chlorella_NC64A.best_proteins.fasta.gz	http://genome.jgi-psf.org/ChlNC64A_1/ChlNC64A_1.download.ftp.html
Citrus clementina	CITCLE		Viridiplantae/Embryophyta	JGI	2011-12-04	v6.0	1/15/11	Cclementina_165_peptide.fa.gz	ftp://ftp.jgi-psf.org/pub/JGI_data/phytozome/v6.0/
Citrus sinensis	CITSI	Sweet orange	Viridiplantae/Embryophyta	JGI	2011-12-04	v6.0	1/15/11	Csinensis_154_peptide.fa.gz	ftp://ftp.jgi-psf.org/pub/JGI_data/phytozome/v6.0/
Coccomyxa sp. C-169/Chlorella vulgaris C-169	CHLVUL		Chlorophyta/Trebouxiophyceae	JGI	2010-12-02	2	2.0 (December 18, 2009)	Coccomyxa_C169_v2_filtered_proteins.fasta.gz	http://genome.jgi-psf.org/Coc_C169_1/Coc_C169_1.download.ftp.html
Cucumis sativis	CUCSA	Garden cucumber	Viridiplantae/Embryophyta	JGI	2010-05-07	1.0		Cucsa_v1.pep.fa.gz	http://genome.jgi-psf.org/cucumber/cucumber.download.ftp.html
Cyanidioschyzon merolae	CYAME	Red alga	Rhodophyta	National Institute of Genetics, Japan	2008-01-08	(17-Sep-2005)		cds.fasta	http://merolae.biol.s.u-tokyo.ac.jp/download/
Eucalyptus grandis	EUCGR		Viridiplantae/Embryophyta	JGI	2011-12-04	v6.0	1/15/11	Egrandis_162_peptide.fa.gz	ftp://ftp.jgi-psf.org/pub/JGI_data/phytozome/v6.0/
Glycine max	SOYBN	Soybean	Viridiplantae/Embryophyta	JGI	2009-11-09	1.0	(12/17/2008)	Glyma1.pep.fa.gz	ftp://ftp.jgi-psf.org/pub/JGI_data/Glycine_max/Glyma1/annotation/
Manihot esculenta	MANES	Tapioca	Viridiplantae/Embryophyta	JGI	2010-05-07	1.1		cassava_v1.1.pep.filter.fa	http://genome.jgi-psf.org/cassava/cassava.download.ftp.html
Medicago truncatula	MEDTR	Barrel medic	Viridiplantae/Embryophyta	JGI	2011-12-04	v6.0	8/26/11	Mtruncatula_135_peptide.fa.gz	ftp://ftp.jgi-psf.org/pub/JGI_data/phytozome/v6.0/
Micromonas pusilla CCMP1545	MICPC		Chlorophyta/Prasinophyceae	JGI	2008-03-07	2	v2.0(Feb, 2008)	MicromonasCCMP1545.FrozenGeneCatalog_20080206.aa.fasta.gz	http://genome.jgi-psf.org/MicpuC2/MicpuC2.download.ftp.html
Micromonas strain RCC299	MICSR		Chlorophyta/Prasinophyceae	JGI	2008-03-07	2	v2.0 (Feb 2008)	MicromonasRCC299.FrozenGeneCatalog_20080206.aa.fasta.gz	http://genome.jgi-psf.org/MicpuN2/MicpuN2.download.ftp.html
Mimulus nasutus	MIMGU	Yellow monkey flower	Viridiplantae/Embryophyta	JGI	2010-05-07	1.0		Mimulus.guttatus.v1.0.peptide.fa.gz	http://genome.jgi-psf.org/mimulus/mimulus.download.ftp.html
Oryza sativa	ORYSA	Rice	Viridiplantae/Embryophyta	TIGR	2007-07-14	Release 5		osa_chr1_12_tigr.fasta	http://www.tigr.org/tdb/e2k1/osa1/data_download.shtml
Ostreococcus lucimarinus	OSTLU		Chlorophyta/Prasinophyceae	JGI	2007-07-12	2		O.lucimarinus.FM.aa.fasta	http://genome.jgi-psf.org/Ost9901_3/Ost9901_3.home.html
Ostreococcus sp. RCC809	OSTRC		Chlorophyta/Prasinophyceae	JGI	2008-08-14	1	v.1.0 (August 2008)	OstRCC809.FM1.aa.fasta.gz	http://genome.jgi-psf.org/OstRCC809_1/OstRCC809_1.info.html
Ostreococcus tauri	OSTTA		Chlorophyta/Prasinophyceae	JGI	2007-09-22	2		O.tauri.FM.aa.fasta	http://genome.jgi-psf.org/Ostta4/Ostta4.download.ftp.html
Physcomitrella patens ssp patens	PHYPA	Moss	Viridiplantae/Embryophyta	JGI	2007-09-22	1.1	v.1.1 (March 2007)	proteins.Phypa1_1.FilteredModels3.fasta	http://genome.jgi-psf.org/Phypa1_1/Phypa1_1.download.ftp.html
Populus trichocarpa	POPTR	Western balsam poplar	Viridiplantae/Embryophyta	JGI	2007-02-10	1.1	v1.0 (June 2004)	proteins.Poptr1_1.JamboreeModels.fasta	http://genome.jgi-psf.org/Poptr1_1/Poptr1_1.download.ftp.html
Prunus persica	PRUPE	Peach	Viridiplantae/Embryophyta	JGI	2011-12-04	v6.0	8/26/10	Ppersica_139_peptide.fa.g	ftp://ftp.jgi-psf.org/pub/JGI_data/phytozome/v6.0/
Ricinus communis	RICCO	Castor bean	Viridiplantae/Embryophyta	JGI	2011-12-04	v6.0	8/30/10	Rcommunis_119_peptide.fa.g	ftp://ftp.jgi-psf.org/pub/JGI_data/phytozome/v6.0/
Selaginella moellendorffii	SELMO	Spikemoss	Viridiplantae/Embryophyta	JGI	2007-12-21	1	v1.0 (March 2007)	Selmo1_GeneModels_FilteredModels3_aa	http://genome.jgi-psf.org/Selmo1/Selmo1.download.ftp.html
Setaria italica	SETIT	Foxtail millet	Viridiplantae/Embryophyta	JGI	2011-12-04	v6.0	8/30/10	Sitalica_155_peptide.fa.gz	ftp://ftp.jgi-psf.org/pub/JGI_data/phytozome/v6.0/
Sorghum bicolor	SORBI	Sorghum	Viridiplantae/Embryophyta	JGI	2008-04-21	1.0	v1.0 (March 2007)	Sorbi1_GeneModels_FilteredModels6_aa.fasta.gz	http://genome.jgi-psf.org/Sorbi1/Sorbi1.download.ftp.html
Vitis vinifera	VITVI	Grape	Viridiplantae/Embryophyta	Genoscope	2007-11-23	v1	(06-Sep-2007)	Vitis_vinifera_peptide_v1.fa	http://www.genoscope.cns.fr/externe/English/Projets/Projet_ML/data/annotation/
Volvox carteri f. nagariensis	VOLCA		Chlorophyta/Chlorophyceae	JGI	2007-07-12	1	v.1.0 (March 2007)	VOLCA.proteins.FilteredModels2.fasta.gz	http://genome.jgi-psf.org/Volca1/Volca1.home.html
Zea mays	MAIZE	Maize	Viridiplantae/Embryophyta	JGI	2011-12-04	v6.0	8/26/10	Zmays_121_peptide.fa.gz	ftp://ftp.jgi-psf.org/pub/JGI_data/phytozome/v6.0/
Chromalveolates
Aureococcus anophagefferens	AURAN		stramenopiles/Pelagophyceae	JGI	2007-01-10	1	v.1.0 (June 2007)	proteins.Auran1_FilteredModels3.fasta	http://genome.jgi-psf.org/Auran1/Auran1.download.ftp.html
Cryptosporidium hominis TU502	CRYHO		Alveolata/Apicomplexa/Coccidia	NIH/NIAID/ApiDB	2007-11-07	rel 3.0 (11-May-2007)		ChominisAnnotatedProtein.fsa	http://apidb.org/common/downloads/release3.0/CryptoPlasmoToxo_downloads/ChominisProteins/
Cryptosporidium parvum IOWA	CRYPV		Alveolata/Apicomplexa/Coccidia	NIH/NIAID/ApiDB	2007-11-07	rel 3.0 (11-May-2007)		CparvumAnnotatedProtein.fsa	http://apidb.org/common/downloads/release3.0/CryptoPlasmoToxo_downloads/CparvumProteins/
Emiliania huxleyi CCMP1516	EMIHU		Haptophyta	JGI	2008-04-29	V 1.0	v.1.0 (3 November 2006)	Emihu1_best_proteins.fasta.gz	http://genome.jgi-psf.org/Emihu1/Emihu1.download.ftp.html
Fragilariopsis cylindrus	FRACY		stramenopiles/Bacillariophyta (diatoms)	JGI	2009-11-27	1	(September 30 2009)	Fracy1_GeneModels_FilteredModels1_aa.fasta	http://genome.jgi-psf.org/Fracy1/Fracy1.download.ftp.html
Paramecium tetraurelia	PARTE		Alveolata/Ciliophora	Genoscope	2007-07-31	v1		Paramecium_peptide_v1.fa	http://www.genoscope.cns.fr/externe/Francais/Projets/Projet_FN/data/annotation/
Phaeodactylum tricornutum	PHATR		stramenopiles/Bacillariophyta (diatoms)	JGI	2007-07-12	2	v.2.0 (August 2006)	Phatr2_geneModels_FilteredModels2_aa.fasta	http://genome.jgi-psf.org/Phatr2/Phatr2.home.html
Phytophthora infestans	PHYIN	Late blight agent	stramenopiles/Oomycetes (water molds)	Broad Institute of Harvard and MIT	2008-01-14	1		phytophthora_infestans_1_proteins.fasta.gz	http://www.broad.mit.edu/annotation/genome/phytophthora_infestans/Downloads.html
Phytophthora ramorum	PHYRM	Sudden oak death agent	stramenopiles/Oomycetes (water molds)	JGI	2007-11-01	1.1	v1.0 (April 2004)	proteins.FM_Phyra1_1.fasta	http://genome.jgi-psf.org/Phyra1_1/Phyra1_1.download.ftp.html
Phytophthora sojae	PHYSO	Root and stem rot agent	stramenopiles/Oomycetes (water molds)	JGI	2007-02-10	1.1	v1.0 (April 2004)	proteins.FM_Physo1_1.fasta	http://genome.jgi-psf.org/Physo1_1/Physo1_1.download.ftp.html
Plasmodium chabaudi AS	PLACH		Alveolata/Apicomplexa/Aconoidasida	NIH/NIAID/ApiDB	2007-11-07	rel 3.0 5-3 (11-May-2007)		PchabaudiAnnotatedProteins_plasmoDB-5.3.fasta	http://apidb.org/common/downloads/release3.0/CryptoPlasmoToxo_downloads/PchabaudiProteins/
Plasmodium falciparum 3D7	PLAFA	Malaria parasite	Alveolata/Apicomplexa/Aconoidasida	NIH/NIAID/ApiDB	2007-11-07	rel 3.0 5-3 (11-May-2007)		PfalciparumAnnotatedProteins_plasmoDB-5.3.fasta	http://apidb.org/common/downloads/release3.0/CryptoPlasmoToxo_downloads/PfalciparumProteins/
Plasmodium yoelii yoelii	PLAYO		Alveolata/Apicomplexa/Aconoidasida	TIGR	2008-01-29	(7/23/2004)		PYA1.pep	ftp://ftp.tigr.org/pub/data/Eukaryotic_Projects/p_yoelii/annotation_dbs/
Tetrahymena thermophila	TETTH		Alveolata/Ciliophora	TIGR	2007-07-14	8313006		TTA1_08302006.pep	ftp://ftp.tigr.org/pub/data/Eukaryotic_Projects/t_thermophila/annotation_dbs/interim_annotation_release_08313006/TTA1_08302006.pep
Thalassiosira pseudonana	THAPS		stramenopiles/Bacillariophyta (diatoms)	JGI	2007-07-30	3	v3.0 (August 2006)	Thaps3_geneModels_FilteredModels2_aa.fasta	http://genome.jgi-psf.org/Thaps3/Thaps3.download.ftp.html
Theileria annulata Ankara C9	THEAN		Alveolata/Apicomplexa/Aconoidasida	Sanger	2008-08-12	7/15/2005		TANN.GeneDB.pep	ftp://ftp.sanger.ac.uk/pub/pathogens/T_annulata/
Theileria parva Muguga	THEPA	East coast fever parasite	Alveolata/Apicomplexa/Aconoidasida	TIGR/ILRI	2008-01-29	(7/25/2007)		3 files	ftp://ftp.ncbi.nlm.nih.gov/genomes/Protozoa/Theileria_parva/
Toxoplasma gondii ME49	TOXGO		Alveolata/Apicomplexa/Coccidia	NIH/NIAID/ApiDB	2007-11-07	rel 3.0 4-2 (11-May-2007)		TgondiiAnnotatedProteins_toxoDB-4.2.fasta	http://apidb.org/common/downloads/release3.0/CryptoPlasmoToxo_downloads/TgondiiProteins/
Excavata
Giardia lamblia	GIALA	Giardiasis agent	Metamonada/Diplomonadida	MBL/GiardiaDB	2007-11-07	1.0 (21-Sep-2007)		GlambliaAnnotatedProteins_GiardiaDB-1.0.fasta	http://www.giardiadb.org/common/downloads/release1.0/
Leishmania major Friedlin	LEIMA		Euglenozoa/Kinetoplastida	Sanger	2007-11-08	(5/11/2006)		GeneDB_Protein_database_110506	ftp://ftp.sanger.ac.uk/pub/databases/L.major_sequences/LEISHPEP/
Naegleria gruberi	NAEGR	Amoeba	Heterolobosea	JGI	2007-07-12	1	v.1.0 (August 2006)	Naegr1_best_poroteins.fasta	http://genome.jgi-psf.org/Naegr1/Naegr1.home.html
Trichomonas vaginalis G3	TRIVA		Metamonada/Parabasalidea	TrichDB	2008-08-12	1.0 (22-Aug-2007)		TvaginalisAnnotatedProteins_TrichDB-1.0.fasta	http://trichdb.org/common/downloads/release1.0/
Trypanosoma brucei	TRYBB	Sleeping sickness agent	Euglenozoa/Kinetoplastida	TIGR	2007-11-07	(7/24/2005)		TBA1.pep	ftp://ftp.tigr.org/pub/data/Eukaryotic_Projects/t_brucei/annotation_dbs/
