# Supplementary material for: This Déjà Vu Feeling—Analysis of Multidomain Protein Evolution in Eukaryotic Genomes
Source: PLoS Comput Biol. 2012 Nov 15;8(11):e1002701. doi: 10.1371/journal.pcbi.1002701 (PMC3499355; doi:10.1371/journal.pcbi.1002701)
Supplement: Table S4 — Domains appearing only in multidomain proteins. This table shows the 535 domains that appear only in multidomain proteins in the 172 genomes analyzed. Summary of conditions used: protein predictions as listed in Table S1, domain models from Pfam 25.0, analyzed with HMMER 3.0, Pfam “gathering” cutoffs. (XLS) [file pcbi.1002701.s010.xls]

## Sheet: Sheet1
Pfam domains
2C_adapt
2Fe-2S_Ferredox
3-alpha
3HBOH
5HT_transporter
ABC_transp
ABC-3
ABC2_membrane_4
Abdominal-A
AcetDehyd-dimer
Aconitase_2_N
Acyl-thio_N
AcylCoA_DH_N
Ad_cyc_g-alpha
ADSL_C
AFOR_N
Aft1_HRA
Aft1_HRR
Ag332
Ala_racemase_C
AlgF
AlkA_N
Alpha-2-MRAP_N
AMH_N
AMNp_N
AMO
Androgen_recep
Antimicrobial_1
APC_15aa
APC_basic
APC_crr
Apidaecin
Apis_Csd
APOBEC_C
APS-reductase_C
AraC_N
AreA_N
Arg_repressor_C
Asp-Al_Ex
ATPase-cat_bd
Attacin_N
Autoind_bind
B12-binding_2
Bac_export_3
BCA_ABC_TP_C
BetaGal_dom2
BiPBP_C
BmKX
Bre5
CAP18_C
Carbpep_Y_N
CARM1
Cas_Cas4
Cauli_DNA-bind
CbbQ_C
CBFNT
CbiG_C
CbiZ
Cbl_N2
CBM_10
CBM_25
CBM_X
CD4-extracel
CD47
CelD_N
CHB_HEX_C
CheB_methylest
CheD
CheR_N
CheY-binding
ChiC
ChitinaseA_N
CHMI
CholecysA-Rec_N
Choline_kin_N
Chon_Sulph_att
CitF
CitG
Co_AT_N
Connexin43
Connexin50
COX_ARM
COXG
CReP_N
Cryptochrome_C
CsgG
CsoS2_M
CXCR4_N
Cytochrom_B562
D-aminoacyl_C
DAP_B
DAP_C
DbpA
DEAD_assoc
DEC-1_C
DEC-1_N
Dec1
Defensin_1
DeoR
Dioxygenase_N
DiS_P_DiS
DltD_C
DmpG_comm
DNA_ligase_aden
DNA_ligase_OB
DNA_ligase_ZBD
DNA_pack_C
DNA_pol_B_exo2
DNA_pol3_chi
DnaB
DnaB_bind
Doppel
DPRP
Dsl1_N
DUF1034
DUF11
DUF1103
DUF1119
DUF1174
DUF126
DUF1292
DUF1299
DUF1456
DUF1485
DUF1508
DUF1515
DUF1538
DUF1557
DUF161
DUF1656
DUF1667
DUF1732
DUF1738
DUF1799
DUF1854
DUF1856
DUF1930
DUF1939
DUF1949
DUF1956
DUF1965
DUF1974
DUF1979
DUF1986
DUF2014
DUF2019
DUF2081
DUF2090
DUF2136
DUF2155
DUF2222
DUF2282
DUF2314
DUF2329
DUF2344
DUF2378
DUF2403
DUF2437
DUF249
DUF2500
DUF261
DUF2610
DUF2630
DUF2796
DUF2874
DUF2895
DUF291
DUF2920
DUF2931
DUF2990
DUF3029
DUF3232
DUF3249
DUF326
DUF3262
DUF3264
DUF3313
DUF3329
DUF3340
DUF3352
DUF3366
DUF3369
DUF3377
DUF3382
DUF3387
DUF3394
DUF3400
DUF3412
DUF3420
DUF3436
DUF3438
DUF3454
DUF3457
DUF347
DUF3470
DUF3471
DUF3474
DUF348
DUF349
DUF3492
DUF3502
DUF3516
DUF3517
DUF3526
DUF3542
DUF3544
DUF3547
DUF3578
DUF3597
DUF3610
DUF3625
DUF3631
DUF3646
DUF3656
DUF3660
DUF3664
DUF3670
DUF3672
DUF368
DUF369
DUF3732
DUF3748
DUF3814
DUF3829
DUF3875
DUF442
DUF496
DUF521
DUF560
DUF603
DUF801
DUF851
DUF902
DUF959
DUF977
DUF990
EB1_binding
EBP50_C-term
ecTbetaR2
EKR
Endotoxin_C
Engrail_1_C_sig
Eno-Rase_NADH_b
Enoyl_reductase
ERbeta_N
ESR1_C
EST1_DNA_bind
ET
EutC
Excalibur
Fer4_6
FeS
Filament_head
FixQ
FKBP_N
Flagellin_IN
FlbT
FlgI
FlgM
FliD_C
FliD_N
FliM
FlpD
Fmp27_SW
Fork_head_N
FTCD
Ftsk_gamma
FTZ
G2F
GBP_repeat
GCR
GcrA
GlnD_UR_UTase
GlnE
Glucosaminidase
Gly-rich_Ago1
Glyco_hydro_65C
Glyco_hydro_65N
Glyco_hydro_67C
Glyco_hydro_67M
GlycosTransf
GMAP
GnHR_trans
GreA_GreB_N
GSCFA
GSH-S_N
GSIII_N
GspL_C
GT36_AF
H-K_ATPase_N
He_PIG_assoc
Hepsin-SRCR
HIRA_B
HNF-1A_C
Hom_end
Hormone_4
Host_attach
HpaB
Hpr_kinase_C
Hpr_kinase_N
HrcA
HrcA_DNA-bdg
HrpB_C
HsdM_N
HTH_DeoR
HTH_Mga
HTH_Tnp_IS66
HupH_C
HWE_HK
HypA
HypD
IBP39
Ig_Tie2_1
IGF2_C
IMS_HHH
Integrase_1
Involucrin2
IR1-M
IRK_N
K_channel_TID
KCNQC3-Ank-G_bd
KdpA
Kv2channel
L27_N
LAM_C
Leader_Erm
LexA_DNA_bind
LGFP
LGT
Lip_prot_lig_C
Lipoprotein_18
LpxD
LrgA
Lyase_8_C
Lyase_8_N
MAAL_N
Mad3_BUB1_II
Mdv1
Med25_SD1
Methyltransf_13
Methyltransf_14
MethyTransf_Reg
MetRS-N
MG1
Mga
MHCassoc_trimer
MinC_N
MipZ
MltA
MmoB_DmpM
MMR_HSR1_C
MraY_sig1
MraZ
Mu-like_Com
Myc-LZ
Myelin-PO_C
N-Term_TEN
Nab1
Nab6_mRNP_bdg
NADH_dehy_S2_C
NADH_u_ox_C
Neuro_bHLH
Neuromodulin
Neuromodulin_N
NIL
NOD
Nod_GRP
NODP
NPP
NUC202
Nucleo_P87
NUMOD1
NusA_N
NUT_C
Nyv1_N
OGFr_III
OKR_DC_1_N
Op_neuropeptide
Optomotor-blind
OrfB_IS605
P120R
p47_phox_C
P53_C
P53_tetramer
P68HR
PaaB
ParB
PBP5_C
PCP_red
PDE8
PDZ_assoc
Peptidase_M15
Peptidase_M3_N
Peptidase_S68
Pericardin_rpt
PEX-2N
PFEMP
PFL
PG_binding_3
PHAT
PHBC_N
Phe_hydrox_dim
Phe_tRNA-synt_N
PhnA_Zn_Ribbon
PHY
Pili_assembly_C
Pilin
Pinin_SDK_N
Plasmod_MYXSPDY
PNPase
Pollen_allerg_2
PolyA_pol_arg_C
Potassium_chann
Pox_Ag35
PQQ_C
PRANC
Preseq_ALAS
Prion_octapep
PrkA
Proho_convert
PXB
PY_rept_46
PyrI
PyrI_C
Radical_SAM_N
RDM
RecO_C
Recombinase
RepB
Rho_RNA_bind
Rhodopsin_N
Ring_hydroxyl_A
RNA_pol_Rpa2_4
RNA_pol_Rpb2_4
RNA_pol_Rpb2_45
RNA_pol_Rpb2_5
RP-C
RP-C_C
RskA
RuvA_C
RuvA_N
RuvB_C
S19
Saccharop_dh_N
SARA
ScpA_ScpB
Sec_GG
Sec16_N
Sec31
Secretin_N
Secretin_N_2
SelP_C
Sfi1_C
Shal-type
Sialidase_penC
Sigma54_CBD
Sigma70_ner
Sigma70_r1_2
SIP
SlyX
SNN_cytoplasm
SNN_linker
SNN_transmemb
Sorting_nexin
Sox_N
SPO11_like
Spore_II_R
Spore_permease
SpvB
SRC-1
SspO
STAT2_C
Ste5
STN
Stn1_C
SUA5
Surfac_D-trimer
Sushi_2
Synthase_beta
Tail_P2_I
TAT_ubiq
TBX
TcdB_toxin_midC
Tellurium_res
TEP1_N
Tet_res_leader
TetR_C_3
TetR_C_4
TgMIC1
ThiI
Thrombin_light
TilS
TilS_C
TipAS
Titin_Z
Tme5_EGF_like
TolB_N
Toprim_N
Tower
Toxin_R_bind_N
TPPII_N
TPR_3
TraC
Transport_MerF
TrbL
Trehalase_Ca-bi
tRNA_synt_1c_R2
Troponin-I_N
TruB_C
UBA_3
Ubiq-Cytc-red_N
UPF0150
UPF0223
Ustilago_mating
UvrB
UXS1_N
Vert_IL3-reg_TF
Vicilin_N
VitD-bind_III
W_rich_C
Wos2
XFP
XFP_C
Xin
Xol-1_GHMP-like
Xylo_C
YhjQ
YicC_N
YscJ_FliF_C
YscO
zf-FPG_IleRS
zf-NPL4
zf-RAG1
ZipA_C
Zn_Tnp_IS1595
