# Supplementary material for: This Déjà Vu Feeling—Analysis of Multidomain Protein Evolution in Eukaryotic Genomes
Source: PLoS Comput Biol. 2012 Nov 15;8(11):e1002701. doi: 10.1371/journal.pcbi.1002701 (PMC3499355; doi:10.1371/journal.pcbi.1002701)
Supplement: Table S5 — Domain and domain combination counts in extant species. This table shows the numbers of distinct domains and domain combinations for the 172 genomes analyzed (color coded according to taxonomic groups and inversely sorted according to the number of domain combinations). The ratio (domain combinations)/(domains2) is also shown, Summary of conditions used: protein predictions as listed in Table S1, domain models from Pfam 25.0, analyzed with HMMER 3.0, Pfam “gathering” cutoffs. (XLS) [file pcbi.1002701.s011.xls]

## Sheet: dc_counts_ext_nodes
Organism	Domain Combinations	Domains	DC/D^2
Branchiostoma floridae	6292	3893	0.000415164		Colors:
Homo sapiens	4821	4354	0.000254308		Metazoa
Mus musculus	4632	4336	0.000246371		Choanoflagellata
Saccoglossus kowalevskii	4608	3931	0.000298199		Fungi
Pan troglodytes	4606	4311	0.000247838		Amoebozoa
Canis familiaris	4511	4261	0.000248456		Embryophyta (land plants)
Rattus norvegicus	4487	4251	0.000248298		Chlorophyta (green algae)
Bos taurus	4455	4277	0.000243539		Heterokonta
Monodelphis domestica	4435	4193	0.000252257		Alveolata
Takifugu rubripes	4400	4032	0.000270652		Excavata
Cavia porcellus	4392	4246	0.000243614
Gasterosteus aculeatus	4195	4039	0.000257149
Gallus gallus	4143	3915	0.000270303
Tetraodon nigroviridis	4101	3952	0.000262577
Oryzias latipes	4093	3955	0.000261667
Danio rerio	4049	4051	0.000246731
Taeniopygia guttata	4014	3877	0.000267046
Strongylocentrotus purpuratus	3967	3718	0.000286975
Anolis carolinensis	3948	3996	0.000247244
Xenopus tropicalis	3926	4131	0.000230059
Capitella teleta	3451	4088	0.000206501
Felis catus	3439	3810	0.000236909
Tribolium castaneum	3321	3453	0.000278532
Ornithorhynchus anatinus	3280	3755	0.000232624
Amphimedon queenslandica	3198	3589	0.000248274
Apis mellifera	3151	3494	0.000258109
Nematostella vectensis	3126	3828	0.000213327
Lottia gigantea	3057	3705	0.000222699
Daphnia pulex	2940	3520	0.00023728
Drosophila melanogaster	2924	3489	0.000240201
Nasonia vitripennis	2833	3147	0.000286057
Anopheles gambiae	2756	3352	0.000245285
Culex pipiens	2718	3395	0.000235814
Aedes aegypti	2665	3332	0.000240042
Caenorhabditis briggsae	2654	3204	0.000258533
Acyrthosiphon pisum	2620	3135	0.000266579
Salpingoeca rosetta	2583	3017	0.000283775
Caenorhabditis elegans	2523	3231	0.000241681
Ciona savignyi	2453	2990	0.000274382
Ciona intestinalis	2423	3043	0.000261667
Helobdella robusta	2399	3289	0.00022177
Ricinus communis	2394	3945	0.000153826
Trichoplax adhaerens	2372	3221	0.00022863
Monosiga brevicollis	2359	2754	0.000311028
Capsaspora owczarzaki	2348	3031	0.00025558
Arabidopsis lyrata	2264	3377	0.000198525
Phytophthora sojae	2249	2738	0.000300001
Populus trichocarpa	2245	3876	0.000149434
Hydra magnipapillata	2240	3321	0.0002031
Ixodes scapularis	2217	3305	0.000202966
Zea mays	2207	3296	0.000203155
Phytophthora ramorum	2194	2751	0.000289905
Vitis vinifera	2167	3358	0.000192175
Glycine max	2159	3397	0.000187095
Brachypodium distachyon	2159	3336	0.000193999
Arabidopsis thaliana	2130	3427	0.000181364
Schistosoma mansoni	2127	2917	0.000249974
Phytophthora infestans	2111	2837	0.000262283
Thecamonas trahens	2110	2817	0.000265894
Pristionchus pacificus	2077	2897	0.00024748
Eucalyptus grandis	2069	3373	0.000181856
Oryza sativa	2067	3389	0.000179969
Mimulus guttatus	2055	3354	0.000182678
Citrus clementina	2035	3363	0.000179933
Selaginella mollis	2025	3256	0.00019101
Prunus persica	2006	3339	0.000179928
Sorghum bicolor	2005	3390	0.000174468
Aspergillus flavus	1999	3142	0.000202489
Spizellomyces punctatus	1973	3047	0.000212511
Brugia malayi	1969	2889	0.000235912
Manihot esculenta	1960	3399	0.00016965
Physcomitrella patens subsp. patens	1957	3474	0.000162155
Setaria italica	1943	3363	0.000171798
Dictyostelium discoideum	1938	2837	0.000240788
Emiliania huxleyi	1932	2957	0.000220955
Postia placenta	1926	2726	0.000259182
Citrus sinensis	1921	3318	0.000174492
Cucumis sativus	1903	3331	0.00017151
Aquilegia caerulea	1886	3329	0.000170182
Aureococcus anophagefferens	1886	2299	0.000356832
Dictyostelium purpureum	1846	2756	0.000243037
Medicago truncatula	1832	3052	0.000196678
Chaetomium globosum	1743	2978	0.000196539
Emericella nidulans	1734	3103	0.000180088
Trichoderma virens	1727	3140	0.000175159
Gibberella zeae	1701	3187	0.000167471
Neosartorya fischeri	1695	3164	0.000169316
Carica papaya	1690	3241	0.00016089
Rhizopus oryzae	1685	2771	0.000219446
Volvox carteri	1678	2885	0.000201605
Magnaporthe grisea	1660	3098	0.00017296
Pyrenophora tritici-repentis	1659	3130	0.000169339
Bombyx mori	1646	2959	0.000187992
Coprinopsis cinerea	1638	2844	0.000202514
Thielavia terrestris	1631	3033	0.0001773
Coccomyxa sp. C-169	1625	2787	0.000209209
Cochliobolus heterostrophus	1623	3009	0.000179256
Myceliophthora thermophila	1619	3048	0.000174268
Coccidioides immitis	1617	2969	0.000183438
Neurospora crassa	1607	3084	0.000168961
Acremonium alcalophilum	1606	2962	0.000183052
Oikopleura dioica	1605	2772	0.000208876
Uncinocarpus reesii	1595	2861	0.000194861
Ustilago maydis	1595	2737	0.000212917
Micromonas sp.	1593	2847	0.000196535
Mycosphaerella pini	1590	3098	0.000165666
Mycosphaerella populorum	1588	3077	0.000167724
Phaeosphaeria nodorum	1581	3166	0.000157728
Gloeophyllum trabeum	1572	2965	0.000178815
Fomitopsis pinicola	1553	2943	0.000179304
Dichomitus squalens	1553	2837	0.000192954
Phycomyces blakesleeanus	1539	2890	0.000184265
Trametes versicolor	1538	2873	0.000186331
Mycosphaerella graminicola	1516	3007	0.000167661
Mycosphaerella fijiensis	1512	2937	0.000175285
Serpula lacrymans	1508	2806	0.000191525
Ceriporiopsis subvermispora	1508	2720	0.000203828
Naegleria gruberi	1506	2541	0.000233247
Chlorella variabilis	1505	2872	0.00018246
Wolfiporia cocos	1495	2889	0.000179121
Pleurotus ostreatus	1485	2916	0.000174643
Coniophora puteana	1485	2777	0.000192564
Mucor circinelloides	1476	2924	0.000172636
Allomyces macrogynus	1476	2736	0.000197176
Agaricus bisporus var. burnettii	1468	2787	0.000188996
Laccaria bicolor	1433	2883	0.000172408
Chlamydomonas reinhardtii	1432	2766	0.000187171
Heterobasidion annosum	1421	2832	0.000177177
Rhodotorula graminis	1413	2731	0.000189452
Sporobolomyces roseus	1412	2404	0.000244324
Micromonas pusilla	1410	2747	0.000186854
Tetrahymena thermophila	1401	2249	0.000276987
Schizosaccharomyces pombe	1361	2682	0.000189208
Aspergillus niger	1341	2458	0.000221955
Cryptococcus neoformans	1336	2729	0.00017939
Yarrowia lipolytica	1323	2741	0.000176093
Tremella mesenterica	1308	2632	0.000188815
Fragilariopsis cylindrus	1301	2705	0.000177805
Thalassiosira pseudonana	1268	2498	0.000203205
Saccharomyces cerevisiae	1259	2677	0.000175683
Ostreococcus tauri	1257	2497	0.000201604
Pichia angusta	1254	2536	0.000194984
Melampsora laricis-populina	1246	2657	0.000176496
Puccinia graminis	1230	2559	0.00018783
Schizosaccharomyces japonicus	1229	2508	0.000195388
Wallemia sebi	1221	2524	0.000191662
Kluyveromyces lactis	1209	2636	0.000173994
Ashbya gossypii	1202	2586	0.000179741
Phaeodactylum tricornutum	1199	2502	0.000191533
Ostreococcus lucimarinus	1194	2539	0.000185216
Kluyveromyces waltii	1182	2555	0.000181065
Paramecium tetraurelia	1178	2122	0.00026161
Candida tropicalis	1177	2596	0.000174649
Candida albicans	1170	2637	0.000168254
Ostreococcus sp. RCC809	1166	2563	0.000177501
Saccharomyces castellii	1020	2387	0.000179017
Cyanidioschyzon merolae	996	2191	0.000207479
Toxoplasma gondii	975	1916	0.000265591
Leishmania major	812	1840	0.000239839
Trypanosoma brucei brucei	779	1803	0.000239633
Trichomonas vaginalis	765	1753	0.000248942
Plasmodium falciparum	730	1675	0.000260192
Cryptosporidium parvum	716	1412	0.000359123
Plasmodium yoelii yoelii	704	1583	0.000280938
Entamoeba histolytica	647	1475	0.000297386
Theileria annulata	586	1372	0.000311307
Cryptosporidium hominis	554	1265	0.000346201
Plasmodium chabaudi	439	1510	0.000192535
Giardia lamblia	392	1022	0.000375305
Encephalitozoon cuniculi	331	914	0.000396219
Theileria parva	323	889	0.000408695
Pneumocystis carinii	301	1218	0.000202895
