# Supplementary material for: This Déjà Vu Feeling—Analysis of Multidomain Protein Evolution in Eukaryotic Genomes
Source: PLoS Comput Biol. 2012 Nov 15;8(11):e1002701. doi: 10.1371/journal.pcbi.1002701 (PMC3499355; doi:10.1371/journal.pcbi.1002701)
Supplement: Table S6 — Core and clade-specific domain and domain combination numbers. This shows the numbers of core, as well as clade- and species-specific, domains and domain combinations. Summary of conditions used: protein predictions as listed in Table S1, domain models from Pfam 25.0, analyzed with HMMER 3.0, Pfam “gathering” cutoffs. The phylogenetic tree used is shown in Figure S1 and simplified in Figure 1. (XLS) [file pcbi.1002701.s012.xls]

## Sheet: _dcg_counting_is_dir_2_tol_127_
Taxonomy	No. of genomes	Specific domain combinations	Core domain combinations	Specific domains	Core domains
Aconoidasida	5	138	0	46	2
Acremonium alcalophilum	1	25		0
Acyrthosiphon pisum	1	111		1
Aedes aegypti	1	40		3
Agaricales	4	235	0	3	1
Agaricomycetidae	6	314	0	3	0
Agaricomycotina	16	1115	0	13	0
Agaricus bisporus var. burnettii	1	21		0
Allomyces macrogynus	1	115		5
Alveolata	10	742	0	81	0
Amniota	13	563	2	117	5
Amoebozoa	3	482	12	25	0
Amphimedon queenslandica	1	614		32
Andropogoneae	2	540	0	4	0
Annelida	2	245	1	53	0
Annelida & Mollusca	3	315	2	53	0
Anolis carolinensis	1	23		0
Anopheles gambiae	1	19		1
Antrodia clade	2	482	1	1	0
Aphyllophorales	6	579	0	2	0
Apicomplexa	8	237	0	55	1
Apis mellifera	1	224		16
Apocrita	2	428	3	18	1
Aquilegia caerulea	1	31		0
Arabidopsis	2	323	38	16	8
Arabidopsis lyrata	1	203		1
Arabidopsis thaliana	1	82		7
Archaeplastida	33	5173	0	669	4
Arthropoda	11	1507	1	118	4
Ascomycota	33	2156	0	212	0
Ashbya gossypii	1	10		1
Aspergillus	2	424	9	2	0
Aspergillus flavus	1	330		1
Aspergillus niger	1	85		1
Aureococcus anophagefferens	1	761		4
Bacillariophycidae	2	206	14	11	0
Bacillariophyta	3	322	8	14	1
Basidiomycota	22	1744	2	18	0
BEP clade	2	348	8	13	0
Bikonta	56	9823	0	1048	0
Bilateria	44	10149	0	895	2
Bilateria & Cnidaria	46	11286	1	1043	1
Bombyx mori	1	193		9
Bos taurus	1	17		1
Brachypodium distachyon	1	207		1
Branchiostoma floridae	1	2137		1
Brassicales	3	397	0	19	0
Brugia malayi	1	107		1
Caenorhabditis	2	378	41	46	38
Caenorhabditis briggsae	1	268		3
Caenorhabditis elegans	1	69		5
Candida	2	15	2	1	1
Candida albicans	1	5		0
Candida tropicalis	1	8		0
Canis familiaris	1	24		0
Capitella teleta	1	170		51
Capsaspora owczarzaki	1	247		2
Carica papaya	1	73		3
Carnivora	2	35	0	0	0
Cavia porcellus	1	15		2
Ceriporiopsis subvermispora	1	21		0
Chaetomiaceae	3	274	23	1	0
Chaetomium globosum	1	190		0
Chlamydomonadales	2	424	19	8	3
Chlamydomonas reinhardtii	1	142		2
Chlorella variabilis	1	182		0
Chlorophyta	9	1230	0	29	1
Choanoflagellatea & Metazoa	50	14116	2	1358	4
Chordata	23	3963	1	426	0
Chromadorea (Nematoda)	4	1068	9	87	14
Chromalveolate	18	3800	0	131	0
Ciona	2	59	14	5	1
Ciona intestinalis	1	23		3
Ciona savignyi	1	22		1
Citrus	2	60	13	1	0
Citrus clementina	1	27		0
Citrus sinensis	1	20		1
Cnidaria	2	612	9	33	2
Coccidioides immitis	1	84		1
Coccomyxa sp. C-169	1	188		0
Cochliobolus heterostrophus	1	47		0
Codonosigidae	2	1048	115	5	2
Coniophora puteana	1	39		0
Coniophorineae	2	67	0	0	0
Coprinopsis cinerea	1	128		0
core eudicotyledons	15	1902	0	282	0
core polyporoid clade	2	25	0	0	0
Coriolaceae	5	534	0	1	0
Corticata	51	9249	0	947	0
Cryptococcus neoformans	1	12		1
Cryptosporidium	2	17	11	3	3
Cryptosporidium hominis	1	2		0
Cryptosporidium parvum	1	4		0
Cucumis sativus	1	21		2
Culex pipiens	1	115		2
Culicidae	3	184	1	6	0
Cyanidioschyzon merolae	1	54		9
Danio rerio	1	36		2
Daphnia pulex	1	112		10
Deuterostomia	25	5975	2	468	0
Diapsida	3	49	4	3	2
Dichomitus squalens	1	33		0
Dictyostelium	2	421	182	21	11
Dictyostelium discoideum	1	137		5
Dictyostelium purpureum	1	102		5
Dikarya	55	3996	0	299	1
Dikarya & Mucoromycotina	58	4313	0	347	0
Dikarya & Mucoromycotina & Blastocladiomycota	59	4457	0	367	0
Dikarya & Mucoromycotina & Blastocladiomycota & Chytridiomycota	60	4761	0	404	0
Diptera	4	238	2	34	0
Dothideomycetes	7	311	0	7	0
Drosophila melanogaster	1	47		23
Ecdysozoa	15	2590	0	211	0
Eimeriorina	3	88	4	6	0
Embryophyta	23	3721	58	533	78
Emericella nidulans	1	90		1
Emiliania huxleyi	1	611		12
Encephalitozoon cuniculi	1	6		4
Endopterygota	8	1164	0	78	1
Entamoeba histolytica	1	47		4
Euarchontoglires	5	200	1	17	2
Eucalyptus grandis	1	76		0
eudicotyledons	16	1963	0	285	0
Eumetazoa	47	11623	1	1121	5
Euphorbiaceae	2	308	23	118	1
Euteleostomi ("Vertebrata")	19	1416	102	380	67
Eutheria (Boreoeutheria)	8	324	8	51	12
Excavata	5	510	0	64	0
fabids	7	882	0	251	0
Felis catus	1	11		0
Fomitopsis pinicola	1	38		0
Fragilariopsis cylindrus	1	118		9
Fungi	61	4769	0	409	0
Gallus gallus	1	8		1
Gasterosteus aculeatus	1	13		0
Giardia lamblia	1	5		2
Gibberella zeae	1	37		5
Gloeophyllum trabeum	1	31		1
Glycine max	1	147		3
Helobdella robusta	1	74		2
Hemichordata & Echinodermata (Ambulacraria)	2	1614	45	9	2
Heterobasidion annosum	1	37		2
Heterokonta & Alveolata	17	3137	0	110	0
Holozoa	51	14704	4	1405	2
Hominidae	2	87	37	8	5
Homo sapiens	1	41		3
Homobasidiomycetes	14	1057	0	11	0
Hydra magnipapillata	1	329		6
Hymenoptera & Lepidoptera & Diptera	7	878	0	67	0
Hypocreales	3	160	0	13	0
Ixodes scapularis	1	67		7
Kinetoplastida & Heterolobosea	3	415	0	34	1
Kluyveromyces	2	13	0	0	0
Kluyveromyces lactis	1	3		0
Kluyveromyces waltii	1	10		0
Laccaria bicolor	1	23		1
Laurasiatheria (Scrotifera)	3	55	0	2	0
Leishmania major	1	38		1
Lepidoptera & Diptera	5	436	1	3	1
Lophotrochozoa	4	714	1	58	0
Lottia gigantea	1	65		0
Magnaporthe grisea	1	60		1
Magnoliophyta	21	3096	22	363	21
Malpighiales	3	505	0	232	0
malvids	6	545	0	20	0
Mamiellales	5	364	3	15	1
Mammalia	10	423	3	82	6
Manihot esculenta	1	35		1
Medicago truncatula	1	178		10
Melampsora laricis-populina	1	15		4
Metamonada	2	94	0	29	0
Metazoa	48	12758	9	1305	18
Micromonas	2	201	47	5	1
Micromonas pusilla	1	68		1
Micromonas sp. (strain RCC299 / NOUM17)	1	86		3
Mimulus guttatus	1	100		1
mitosporic Sporidiobolales	2	282	3	0	0
Monodelphis domestica	1	20		1
Monosiga brevicollis	1	559		1
Mucor circinelloides	1	20		1
Mucoraceae	3	262	3	4	0
Murinae	2	80	6	3	2
Mus musculus	1	24		1
Myceliophthora thermophila	1	9		0
Mycosphaerella	4	146	3	2	0
Mycosphaerella fijiensis	1	32		1
Mycosphaerella graminicola	1	41		1
Mycosphaerella pini	1	26		0
Mycosphaerella populorum	1	29		0
Naegleria gruberi	1	321		15
Nasonia vitripennis	1	201		1
nematode Clade V	3	934	9	71	19
Nematostella vectensis	1	274		25
Neognathae	2	21	6	1	0
Neoptera	9	1290	0	85	2
Neosartorya fischeri	1	24		1
Neurospora crassa	1	25		1
Oikopleura dioica	1	169		5
Oligohymenophorea	2	489	35	26	1
Onygenales	2	250	10	2	1
Opisthokonta	112	19822	0	1996	0
Opisthokonta & Apusozoa	113	20511	0	2047	0
Ornithorhynchus anatinus	1	6		0
Oryza sativa	1	133		12
Oryzias latipes	1	16		2
Ostreococcus	3	143	5	9	0
Ostreococcus lucimarinus	1	12		2
Ostreococcus sp. RCC809	1	14		2
Ostreococcus tauri	1	100		5
Pan troglodytes	1	9		0
Pancrustacea	10	1430	4	103	3
Panicoideae	3	569	1	6	1
Papilionoideae	2	327	2	14	1
Paramecium tetraurelia	1	136		10
Pelagophyceae & Bacillariophyta	4	1093	1	19	1
Percomorpha	4	170	0	2	0
Pezizomycotina	21	1858	0	54	0
Phaeodactylum tricornutum	1	74		2
Phaeosphaeria nodorum	1	37		3
Phycomyces blakesleeanus	1	18		1
Physcomitrella patens subsp. patens	1	146		25
Phytophthora	3	1230	171	7	2
Phytophthora infestans	1	241		2
Phytophthora ramorum	1	261		0
Phytophthora sojae	1	260		2
Pichia angusta	1	95		1
Plasmodium	3	98	3	38	10
Plasmodium chabaudi	1	2		4
Plasmodium falciparum	1	29		12
Plasmodium yoelii yoelii	1	50		6
Pleosporaceae	2	111	2	1	0
Pleosporineae	3	154	0	5	0
Pleurotus ostreatus	1	40		0
Pneumocystis carinii	1	26		27
Poaceae	5	956	4	27	3
Populus trichocarpa	1	185		88
Postia placenta	1	443		1
Pristionchus pacificus	1	534		6
Protostomia	19	3329	0	282	0
Prunus persica	1	19		0
Puccinia graminis	1	40		0
Pucciniales	2	57	2	4	0
Pucciniomycotina	4	343	0	4	0
Pyrenophora tritici-repentis	1	62		1
Rattus norvegicus	1	50		0
Rhizopus oryzae	1	204		0
Rhodotorula graminis	1	74		0
Ricinus communis	1	250		116
Rodentia	3	96	0	5	0
rosids	14	1775	1	279	0
Saccharomyces	2	28	1	9	0
Saccharomyces castellii	1	8		0
Saccharomyces cerevisiae	1	19		9
Saccharomyces & Pichia	3	123	0	10	0
Saccharomycetaceae	6	169	4	42	2
Saccharomycetales	9	194	1	66	3
Saccoglossus kowalevskii	1	845		4
Salpingoeca rosetta	1	374		2
Schistosoma mansoni	1	397		5
Schizosaccharomyces	2	50	18	7	2
Schizosaccharomyces japonicus	1	24		0
Schizosaccharomyces pombe	1	8		5
Selaginella mollis	1	247		2
Serpula lacrymans	1	28		0
Setaria italica	1	24		1
Smegmamorpha	2	30	1	2	0
Sordariales	4	303	1	2	0
Sordariomycetes	8	558	1	17	0
Sorghum bicolor	1	99		2
Spizellomyces punctatus	1	220		2
Sporobolomyces roseus	1	205		0
stramenopiles	7	2362	0	27	0
Strongylocentrotus purpuratus	1	724		3
Taeniopygia guttata	1	7		0
Takifugu rubripes	1	71		0
Taphrinomycotina	3	76	0	34	0
Teleostei	5	231	1	4	0
Tetrahymena thermophila	1	318		15
Tetraodon nigroviridis	1	38		0
Tetraodontidae	2	131	22	0	0
Tetrapoda	14	674	2	168	5
Thalassiosira pseudonana	1	98		2
Thecamonas trahens	1	539		9
Theileria	2	36	3	6	4
Theileria annulata	1	29		2
Theileria parva	1	4		0
Theria	9	396	15	69	9
Thielavia	2	36	4	1	0
Thielavia terrestris	1	23		1
Toxoplasma gondii	1	63		3
Tracheophyta	22	3417	15	390	16
Trametes versicolor	1	14		0
Trebouxiophyceae	2	377	7	0	0
Tremella mesenterica	1	28		0
Tremellaceae	2	57	17	1	0
Tribolium castaneum	1	248		2
Trichocomaceae	4	559	4	8	2
Trichoderma virens	1	79		5
Trichomonas vaginalis	1	89		27
Trichoplax adhaerens	1	65		11
Trypanosoma brucei brucei	1	11		7
Trypanosomatidae	2	92	43	18	8
Uncinocarpus reesii	1	156		0
Unikonta	116	21267	0	2156	0
Urochordata	3	239	4	10	0
Urochordata & Vertebrata	22	1702	2	398	2
Ustilago maydis	1	234		1
Viridiplantae	32	5093	2	620	7
Vitis vinifera	1	263		0
Volvox carteri	1	263		3
Wallemia sebi	1	34		0
Wolfiporia cocos	1	11		0
Xenopus tropicalis	1	59		30
Yarrowia lipolytica	1	5		2
Zea mays	1	441		2
