# Supplementary material for: This Déjà Vu Feeling—Analysis of Multidomain Protein Evolution in Eukaryotic Genomes
Source: PLoS Comput Biol. 2012 Nov 15;8(11):e1002701. doi: 10.1371/journal.pcbi.1002701 (PMC3499355; doi:10.1371/journal.pcbi.1002701)
Supplement: Table S8 — List of core domain combinations. Summary of conditions used: protein predictions as listed in Table S1, domain models from Pfam 25.0, analyzed with HMMER 3.0, Pfam “gathering” cutoffs. The phylogenetic tree used is shown in Figure S1 and simplified in Figure 1. (XLS) [file pcbi.1002701.s014.xls]

## Sheet: additonal_table_7
Taxonomy	No. of genomes	Core Domain Combinations…
Agaricus & Coprinopsis	2	2-Hacid_dh_C~HDAC_interact	2-Hacid_dh_C~PAH	COesterase~Cofilin_ADF	COesterase~SH3_1	CS~TPK_catalytic	Cyclin_N~SRP-alpha_N	Cyclin_N~SRP54	Cyclin_N~SRP54_N	DNA_ligase_A_C~Fork_head	DNA_ligase_A_M~Fork_head	DNA_ligase_A_N~Fork_head	DUF726~DUF395	Pkinase~Synaptobrevin	RIO1~SMN	RRM_1~Hap4_Hap_bind	Rio2_N~SMN	Spc97_Spc98~CUE	Sugar_tr~DUF3819	Sugar_tr~Not1	eIF2A~Hap4_Hap_bind
Amniota	13	C2-set~I-set	I-set~C2-set
Amoebozoa	3	C2~DENN	CH~ArfGap	CH~VHP	Filamin~Actin	Glyco_tran_28_C~Alg14	Ist1~Actin	Ist1~Filamin	MIT~LIM	Pkinase~Calpain_III	RCC1~RasGEF	RCC1~RasGEF_N	RhoGEF~VHP
Annelida	2	WSC~Y_phosphatase
Annelida & Mollusca	3	Biotin_lipoyl~NIF	Biotin_lipoyl~PTCB-BRCT
Antrodia clade	2	DUF836~PSP
Apocrita	2	7tm_6~MFS_1	FLYWCH~BTB	SDP_N~Apis_Csd
Arabidopsis	2	DUF247~PPR	DUF547~FBA_1	DUF567~IF-2B	DUF573~TRAM_LAG1_CLN8	DUF604~Malectin	DUF862~DUF247	DnaJ~WCCH	FBA_1~LpxC	FBD~LRR_2	GDPD~Pkinase_Tyr	HIG_1_N~zf-rbx1	HLH~DcpS_C	HLH~Macro	Homeobox~RRM_1	Hydrolase_4~FSH1	Jacalin~Kelch_1	LEA_2~SNARE	LRR_3~WRKY	LSM14~Kelch_1	LpxC~FBA_1	NB-ARC~DZC	NB-ARC~Mob1_phocein	NB-ARC~RCC1	NYN~zf-met	PIG-P~RNase_H2_suC	PPR~DUF1685	PPR_1~COG4	PPR_1~MMR_HSR1	PWWP~DUF618	Ppx-GppA~PPR	RPW8~DUF3633	Redoxin~FBA_1	Reticulon~PPR_1	SANTA~KIP1	TIR~DZC	TIR~RCC1	UDPGT~PPR_1	zf-LYAR~RRM_1
Arthropoda	11	CLIP~Trypsin
Aspergillus	2	DeoC~DUF171	MFS_1~Fungal_trans	MFS_1~Ppx-GppA	UPF0183~Anticodon_1	UPF0183~tRNA-synt_1	Vezatin~PCNA_C	Vezatin~PCNA_N	adh_short~FAD_binding_3	adh_short~Phe_hydrox_dim
Bacillariophycidae	2	ACBP~Acyltransferase	ACBP~DegT_DnrJ_EryC1	ACBP~NAD_binding_4	DegT_DnrJ_EryC1~Acyltransferase	DegT_DnrJ_EryC1~NAD_binding_4	Exo_endo_phos~DUF82	FAD_binding_4~Lact-deh-memb	FIST~IGPS	PX~DUF500	SET~Spermine_synth	TPR_1~Sulfotransfer_1	WW~Cyclin_N	dDENN~ENTH	zf-MYND~DUF2351
Bacillariophyta	3	ChaC~RCC1	DENN~ENTH	DHHA1~CBS	Guanylate_cyc~PDEase_I	NYN~SAP	PseudoU_synth_2~Ocnus	SET~zf-CW	Sec16_C~WW
Basidiomycota	22	Cys_Met_Meta_PP~GHMP_kinases_N	Spermine_synth~Saccharop_dh
BEP clade	2	Kelch_2~Tmemb_cc2	Nodulin-like~PUCC	PPR~MatE	PPR~RWP-RK	RuBisCO_large~Ribosomal_S15	RuBisCO_large_N~Ribosomal_S15	SNase~PIG-H	p450~PPR
Bilateria &Cnidaria	46	BTB~PHR
Caenorhabditis	2	7TM_GPCR_Str~7TM_GPCR_Srj	ANF_receptor~zf-LITAF-like	Alg6_Alg8~Endonuclease_5	Asp~A1_Propeptide	CC~ShK	CK1gamma_C~SEA	Col_cuticle_N~SspO	Collagen~SspO	Cytochrom_B562~Tub	DSPc~THAP	DUF1679~adh_short	F-box~FBA_2	F-box~FTH	FTH~F-box	Ground-like~Hint	Hydrolase~NIPSNAP	I-set~RCSD	Inp1~Senescence	KH_1~Complex1_30kDa	K_tetra~PBD	Kunitz_BPTI~EGF_CA	LRR_4~HIRA_B	LRR_4~Hira	Lig_chan~zf-LITAF-like	Nucleotid_trans~Ground-like	PAN_3~Lectin_C	PHR~zf-B_box	Propep_M14~ShK	RCC1~zf-B_box	RCSD~I-set	RCSD~fn3	Reeler~DUF1794	RhoGEF~RCSD	ShK~Neur_chan_LBD	Thioredoxin~DUF750	Thyroglobulin_1~Sod_Cu	WSN~Ank	WSN~Ank_2	WSN~BRCT	WSN~Y_phosphatase	Xol-1_N~Xol-1_GHMP-like
Candida	2	Candida_ALS_N~Candida_ALS	WD40~Vps8
Chaetomiaceae	3	Abhydrolase_3~FMO-like	BRCT~Fungal_trans	BRCT~Zn_clus	Fcf2~Ribosomal_S10	Fcf2~tRNA-synt_1b	GST_C~DEAD	GST_C~Helicase_C	Glyco_hydro_18~LysM	PARP~Fungal_trans	PARP~Zn_clus	PARP_reg~Fungal_trans	PARP_reg~Zn_clus	Peptidase_M16~ATP-synt_Eps	Peptidase_M16_C~ATP-synt_Eps	PhoD~TauD	PhzC-PhzF~Prp19	TOM13~60KD_IMP	Tannase~CTP_synth_N	Tannase~GATase	WGR~Fungal_trans	WGR~Zn_clus	adh_short~DUF3716	tRNA-synt_2b~Maf
Chlamydomonadales	2	2Fe-2S_Ferredox~Fer2	ABC1~Chromo	ADK~CP12	Ank_2~Acyl_transf_1	CBM_20~SpoIIE	HisKA~Guanylate_cyc	Kazal_2~Peptidase_S8	LRR_4~Kelch_2	LysM~Thioredoxin	Methyltransf_3~DUF3752	Methyltransf_3~DnaJ	Peptidase_C11~CUB	Peptidase_C2~ADK	Peptidase_C2~Guanylate_kin	Pkinase~NTF2	RRM_1~UBA	SBP_bac_1~Guanylate_cyc	UBA~EAP30	peroxidase~Cu-oxidase_2
Choanoflagellatea & Metazoa	50	EGF_CA~EGF	Laminin_N~Laminin_EGF
Chordata	23	fn3~Fibrinogen_C
Chromadorea (Nematoda)	4	Col_cuticle_N~Collagen	DUF830~Aldedh	EB~Kunitz_BPTI	Ion_trans_2~fn3	Methyltransf_16~BcrAD_BadFG	Peptidase_M2~EB	ShK~An_peroxidase	TIL~Sod_Cu	Tyrosinase~ShK
Ciona	2	C1_1~Synaptobrevin	CAP~TSP_1	CUT~zf-C2H2	DUF1973~CBM_14	EGF_3~Somatomedin_B	EGF_CA~Somatomedin_B	Filament~Annexin	LCCL~Ldl_recept_b	LCM~Kelch_2	PAX~OAR	PRKCSH-like~7tm_1	Trefoil~ShK	Trefoil~TSP_1	cEGF~ShK
Citrus	2	ACT~Trypsin	CaATP_NAI~Pkinase	Cys_Met_Meta_PP~ACT	Cys_Met_Meta_PP~Trypsin	DUF1675~PHD	DUF2934~PPDK_N	DUF3675~Nucleoplasmin	Frigida~AP2	Glutaredoxin~Syja_N	HEAT~Arm	HSP70~C1_3	RINGv~Nucleoplasmin	RRM_1~Transformer
Cnidaria	2	Collagen~Gal_Lectin	Fibrinogen_C~TSP_1	Kazal_2~ShK	TSP_1~Cadherin	TSP_1~Ion_trans_2	Trefoil~MAM	VWA~Tyrosinase	YqaJ~Peptidase_C48	fn3~Ion_trans_2
Codonosigidae	2	AKAP7_NLS~R3H	Actin~PH	AhpC-TSA~DUF3638	AhpC-TSA~DUF3645	Ank_2~Glyco_hydro_20	Ank_2~Y_phosphatase	Beta-lactamase~START	Bromo_TP~Bromodomain	C2~SH2	CAP_GLY~PX	CAP_GLY~Y_phosphatase	CH~SH3BGR	Cadherin~Cohesin	Cadherin~Kunitz_BPTI	Cadherin~SH2	Cadherin~Y_phosphatase	Calx-beta~Cadherin	Calx-beta~REJ	Cohesin~Cadherin	Cohesin~PDZ	Cupin_4~Sushi	DCX~DUF924	DEK_C~SAM_1	DSPc~SAM_1	DUF504~R3H	Dala_Dala_lig_C~Peptidase_S9_N	Dpy-30~TerD	EGF_2~Cadherin	EGF_2~SH2	FERM_C~Guanylate_kin	FERM_C~SH3_2	FERM_M~Guanylate_kin	FYVE~SH2	Filamin~MBT	Fringe~Gal-3-0_sulfotr	FtsJ~G-patch	GCC2_GCC3~SH2	GHMP_kinases_C~PALP	GPI-anchored~PDZ	GPI-anchored~PH	GSDH~Somatomedin_B	Gal_Lectin~Bac_rhamnosid	Gelsolin~Annexin	Glyco_hydro_47~PRKCSH	GoLoco~SH2	Guanylate_cyc~Phosphonate-bd	Guanylate_kin~Aminotran_4	Guanylate_kin~Y_phosphatase
Cryptosporidium	2	Ank~Sushi	Ank_2~Sushi	CBM_20~efhand	Fringe~PS_pyruv_trans	LCCL~Pentaxin	PLAT~Pentaxin	PRP1_N~Suf	Pentaxin~LCCL	Rad21_Rec8_N~ScpA_ScpB	U3_assoc_6~CactinC_cactus	zf-CCCH~DUF3352
Culicidae	3	zf-AD~FLYWCH
Deuterostomia	25	EGF~Trypsin	Ldl_recept_a~Fz
Diapsida	3	Fibrinogen_C~Laminin_G_2	Laminin_G_2~Fibrinogen_C	PID~GoLoco	PLA2_inh~UPAR_LY6
Dictyostelium	2	A2M_N~Ras	A2M_N_2~Ras	A2M_N_2~ubiquitin	ADH_N~Chal_sti_synt_C	ADH_N~Chal_sti_synt_N	AIRC~ATP-grasp	Abhydrolase_5~SAM_2	Alpha_kinase~WD40	Amidohydro_1~OHCU_decarbox	Ank~CBM_20	Ank~TBC	Ank_2~CBM_20	Ank_2~Myotub-related	Arch_ATPase~HATPase_c	Arch_ATPase~HisKA	Arch_ATPase~RNA12	Arch_ATPase~Response_reg	ArfGap~Alpha_kinase	Arrestin_C~SAM_1	BAR_2~RhoGAP	BRCT~NACHT	BRCT~RCC1	BRCT~TIR	BRCT~TPR_1	Beta-lactamase~Peptidase_M15	C2~Ank	C2~Arrestin_N	C2~Drf_FH3	C2~Drf_GBD	C2~LRR_4	C2~SBF2	C2~dDENN	C2~uDENN	CAP~Peptidase_C1	CAP~WSC	CBM49~Peptidase_C1	CBM_20~UCH	CH~Cortex-I_coil	CH~PBD	CH~PX	CH~SBF2	CHASE~PAS_3	CRT-like~TPT	CS~Glutaminase	CS~SH3_1	Cbl_N2~SH2	Chromo~Rad60-SLD	DEP~GRAM
Diptera	4	Dpy-30~Ank_2	zf-AD~zf-C2H2_jaz
Eimeriorina	3	ADH_zinc_N~Acyl_transf_1	CBM_20~Pkinase	MAM~Cu_amine_oxid	PRKCSH~YccV-like
Embryophyta	23	AP2~B3	Arm~C2	Auxin_resp~AUX_IAA	B3~AUX_IAA	B3~Auxin_resp	BAH~Chromo	BTB~NPR1_like_C	B_lectin~Pkinase	B_lectin~S_locus_glycop	CCT~GATA	CH~Kinesin	Chitin_bind_1~Glyco_hydro_19	DUF2985~PLAC8	DUF3475~DUF668	DUF3700~DUF3711	DUF568~Cytochrom_B561	DUF630~DUF632	DUF828~PH_2	F-box~Tub	FYVE~DZC	Gal-bind_lectin~Galactosyl_T	Glyco_hydro_16~XET_C	Glyco_hydro_17~X8	Glyco_hydro_9~CBM49	Glycos_transf_1~S6PP	HAD~Acyltransferase	Homeobox~HALZ	Homeobox~MEKHLA	Homeobox~START	KNOX1~KNOX2	KNOX2~ELK	KNOX2~Homeobox_KN	Kinesin~DUF3490	Lectin_legB~Pkinase	Malectin_like~Pkinase_Tyr	NADPH_Ox~FAD_binding_8	NADPH_Ox~Ferric_reduct	NADPH_Ox~NAD_binding_6	OB_NTP_bind~dsrm	PAS_2~PAS	PBD~RhoGAP	PHY~PAS	PMEI~Pectinesterase	POX~Homeobox_KN	Plant_zn_clust~WRKY	QLQ~WRC	S6PP~S6PP_C	SRF-TF~K-box
Euarchontoglires	5	Defensin_propep~Defensin_1
Eumetazoa	47	K_tetra~Ion_trans
Euphorbiaceae	2	ArfGap~Pkinase	B_lectin~RRM_1	CTP_transf_2~SNARE	CTP_transf_2~Syntaxin	DUF1771~PPR	DUF803~C2	DUF803~PPR	HECT~Pkinase	Ins_P5_2-kin~HMA	JmjC~PPR	Kinesin~PPR	Myb_DNA-binding~RRM_1	PP2C~DUF868	PPR~C2	PPR~CBM_20	PPR~DnaJ	PPR_1~Acid_phosphat_B	Pkinase~DUF1242	S_locus_glycop~RRM_1	Serinc~Dirigent	UPF0016~PPR	UPF0114~DUF1218	zf-C3HC4~XS
Euteleostomi ("Vertebrata")	19	7tm_1~DUF1856	7tm_2~Latrophilin	7tm_3~GluR_Homer-bdg	ANF_receptor~GluR_Homer-bdg	ANF_receptor~NMDAR2_C	APOBEC_N~APOBEC_C	ASD1~ASD2	BIR~CARD	CUB~DUF3481	CUB~LCCL	Cadherin~Protocadherin	Cadherin_pro~Cadherin_C	Carb_anhydrase~Y_phosphatase	Carb_anhydrase~fn3	Crystall~Ricin_B_lectin	Cu-oxidase_3~F5_F8_type_C	DUF3436~Peptidase_S41	DUF3497~Latrophilin	EGF_3~Thyroglobulin_1	EGF_3~Xlink	EMI~C1q	EZH2_WD-Binding~SET	F5_F8_type_C~DUF3481	F5_F8_type_C~Peptidase_M14	FA~SAB	FERM_C~SAB	FERM_M~SAB	Fasciclin~Xlink	Fib_alpha~Fibrinogen_C	Filament_head~Filament	G2F~Thyroglobulin_1	GCR~Hormone_recep	GCR~zf-C4	GPS~Latrophilin	Gal_Lectin~Latrophilin	Gla~Trypsin	HIF-1~HIF-1a_CTAD	HLH~DUF3371	HNF-1_N~HNF-1B_C	HR1~Rho_Binding	HRM~Latrophilin	Hemopexin~DUF3377	Hexokinase_2~Hexokinase_1	Homeobox~HNF-1B_C	Homeobox~Pax7	Hox9_act~Homeobox	IRK_N~IRK	KCNQ_channel~KCNQC3-Ank-G_bd
Eutheria (Boreoeutheria)	8	CD4-extracel~C2-set	CD45~Y_phosphatase	Filament~DUF1388	HJURP_mid~HJURP_C	MAGE_N~MAGE	TEP1_N~NACHT	TEP1_N~TROVE	TEP1_N~WD40
Hemichordata & Echinodermata (Ambulacraria)	2	7tm_1~CUB	7tm_1~Ldl_recept_a	AAA_8~I-set	Ank_2~Annexin	CH~SAM_2	CUB~Avidin	CUB~fn3	EGF~Avidin	Exo_endo_phos~7tm_1	Folate_rec~NTR	GCC2_GCC3~C8	GCC2_GCC3~VWD	HYR~7tm_2	HYR~C8	HYR~CUB	HYR~GPS	HYR~SEA	HYR~SRCR	HYR~TIL	HYR~VWD	Ldl_recept_a~GPS	NIDO~HYR	OTU~Exo_endo_phos	PAN_1~7tm_1	PAN_1~SEA	Pentaxin~C8	Pentaxin~TIL	Pentaxin~VWD	Pep_M12B_propep~CUB	Pkinase~Peptidase_S8	Pkinase_Tyr~C2-set_2	Reeler~CUB	ShK~EGF	Sushi~7tm_2	TILa~Sushi	TSP_1~HYR	TSP_1~PAN_1	TSP_1~Pkinase_Tyr	Thyroglobulin_1~PLAC	VWD~HYR	cEGF~SEA	fn3~ASC	fn3~Lectin_C	fn3~PAN_1	fn3~Sushi
Holozoa	51	FERM_M~FERM_C	FERM_N~FERM_C	PDZ~Guanylate_kin	efhand_2~ZZ
Hominini	2	ADK~Dimer_Tnp_hAT	ARPC4~TTL	Ank~Actin	Ank_2~Actin	Brix~7tm_1	CoA_transf_3~Lyase_1	DNA_pol_B~DUF1725	DUF1042~Dimer_Tnp_hAT	DUF255~GlcNAc_2-epim	DUF3534~Cyclin	Glutenin_hmw~Thioredoxin	Glyco_transf_29~DUF3625	I-set~Pro_dh	KRAB~HATPase_c	LIM~PP1_inhibitor	LRRCT~LRRNT	MAGP~ShK	MSC~7tm_2	OGFr_N~OGFr_III	PDZ~PP1_inhibitor	PLAT~NPIP	PQQ~WD40	Pkinase~Filament	Pkinase~PP1_inhibitor	Pkinase_Tyr~KA1	Pre-SET~HTH_Tnp_Tc3_2	Ran_BP1~GRIP	SAND~HMG_box	SET~HTH_Tnp_Tc3_2	SH3_1~ZU5	Sp100~HMG_box	TBC~UCH	TPR_1~GRIP	WD40~PQQ	YHS~AAA	fn3~Pro_dh	zf-C2H2~KRAB
Lepidoptera & Diptera	5	AIRS_C~AIRS
Lophotrochozoa	4	Thyroglobulin_1~Syndecan
Magnoliophyta	21	Ank_2~DUF3354	B_lectin~DUF3403	DUF3357~Glyco_hydro_32C	DUF3357~Glyco_hydro_32N	F-box~FBA_1	F-box~FBA_3	F-box~FBD	HD-ZIP_N~HALZ	HD-ZIP_N~Homeobox	Ion_trans~DUF3354	MFMR~bZIP_1	Malectin~Pkinase_Tyr	NB-ARC~LRR_4	PAN_2~DUF3403	Pec_lyase_N~Pec_lyase_C	Pkinase_Tyr~DUF3403	Remorin_N~Remorin_C	S_locus_glycop~DUF3403	TIG~IQ	Usp~Pkinase	WRC~JmjC	cNMP_binding~DUF3354
Mamiellales	5	DUF3419~Ubie_methyltran	PDZ~FKBP_C	SAP~Suf
Mammalia	10	DUF3776~PHD	Tissue_fac~IFNGR1	fn1~EGF
Metazoa	48	Disintegrin~ADAM_CR	Exostosin~Glyco_transf_64	FG-GAP~Integrin_alpha2	I-set~fn3	MH1~MH2	PAX~Homeobox	Pou~Homeobox	fn3~I-set	zf-C4~Hormone_recep
Micromonas	2	Abhydrolase_1~FAD-oxidase_C	Abhydrolase_1~FAD_binding_4	Amino_oxidase~zf-CW	Ank_2~Dev_Cell_Death	Ank_2~cNMP_binding	CAP_GLY~AAA	CBM_20~Alpha-amylase	DEAD~DUF3516	DSPc~NAD_kinase	DUF3448~PP-binding	DnaJ~GlcNAc	Fasciclin~Chloroa_b-bind	Filamin~REJ	Glycos_transf_1~SNARE_assoc	HIRAN~DUF1917	HMG_box~SWIB	Helicase_C~UvrC_HhH_N	JmjC~MBD	KH_1~Methyltransf_5	Mem_trans~MORN	Methyltransf_6~Aldolase	NIF~Methyltransf_16	NIR_SIR~FAD_binding_6	NIR_SIR~NAD_binding_1	NIR_SIR~Rubredoxin	NIR_SIR_ferr~FAD_binding_6	NIR_SIR_ferr~NAD_binding_1	NIR_SIR_ferr~Rubredoxin	PALP~Pyridoxal_deC	PH~DUF3638	PH~DUF3645	PP-binding~PepX_C	PP-binding~Peptidase_S15	RIIa~efhand	RINGv~Semialdhyde_dh	RINGv~Semialdhyde_dhC	RNase_T~SAP	ResIII~UvrC_HhH_N	Ribosomal_S30~Ribosomal_S15	Rubredoxin~FAD_binding_6	Rubredoxin~NAD_binding_1	SAP~PolyA_pol	SAP~PolyA_pol_RNAbd	Surp~WW	UvrB~UvrC_HhH_N	efhand~p25-alpha	zf-RanBP~DUF2373
mitosporic Sporidiobolales	2	RAI16-like~F-box-like	SET~bZIP_2	VPS9~Pex24p
Mucoraceae	3	CBM_21~Glyco_hydro_15	G-patch~zf-met	zf-C2H2~DUF3020
Murinae	2	C2-set_2~TIR	Mei5~PACT_coil_coil	Na_trans_assoc~IQ	Nrf1_DNA-bind~YchF-GTPase_C	ig~PLAC	ig~hEGF
Mycosphaerella	4	DnaJ~HET	FAR1~Zn_clus	Scm3~GATA
nematode Clade V	3	ICL~Malate_synthase	LysM~Self-incomp_S1	MMgT~SQS_PSY	Peptidase_M14~ShK	SEA~VWA	Self-incomp_S1~Glyco_hydro_18	TIL~Fibrinogen_C	VWA~SEA	VWD~Fibrinogen_C
Neognathae	2	MARVEL~PP2C	PD-C2-AF1~Ank	PD-C2-AF1~Ank_2	PMT~DUF1736	PMT~TPR_1	fn3~EpoR_lig-bind
Oligohymenophorea	2	Ank_2~NTP_transf_2	Anoctamin~Pkinase	Cytochrom_B561~NAD_binding_1	EGF_2~zf-rbx1	GBP~HSP20	GBP~PX	GBP_C~PX	GUCT~RRM_1	H_lectin~REJ	IQ~MORN	Ion_trans_N~Ion_trans_2	Kelch_1~Metallophos	Kinesin~RCC1	MORN~Peptidase_C2	MORN~SAM_1	Myosin_TH1~PH	Myosin_TH1~Pkinase	NLPC_P60~TTL	PH~ATG_C	PH~Sec6	PX~WD40	Pkinase~MORN	Pro_isomerase~FBPase	SAM_1~FHA	SAM_2~RCC1	Sec6~PH	TPR_1~Rubis-subs-bind	TPR_1~VWA	UQ_con~ThiF	UQ_con~UBACT	UQ_con~UBA_e1_C	UQ_con~UBA_e1_thiolCys	ubiquitin~ART	zf-B_box~OST_LOTUS	zf-MYND~Pkinase
Onygenales	2	BTAD~NARP1	CH~RRM_1	MFS_1~ERCC4	PIF1~PTCB-BRCT	Pkr1~APC2	Pkr1~Cullin	RTC~Exo_endo_phos	SEN1_N~zf-CCHC	UvrD-helicase~zf-CCHC	efhand_Ca_insen~RRM_1
Ostreococcus	3	CH~CAMSAP_CH	DPPIV_N~Peptidase_S41	PP-binding~TPP_enzyme_C	TIG~Cadherin-like	Urb2~Sulfotransfer_2
Pancrustacea	10	BTB~HTH_psq	Hemocyanin_N~Hemocyanin_C	Hemocyanin_N~Hemocyanin_M	Methyltransf_FA~DUF3421
Panicoideae	3	ENT~LBR_tudor
Papilionoideae	2	Agenet~F-box	LRR_4~S1FA
Pelagophyceae & Bacillariophyta	4	TTL~Aminotran_5
Phytophthora	3	1-cysPrx_C~Thioredoxin	7TM_GPCR_Srsx~PIP5K	ACBP~PRELI	ACBP~RIC1	AICARFT_IMPCHas~AIRS	AICARFT_IMPCHas~AIRS_C	AICARFT_IMPCHas~Formyl_trans_N	AICARFT_IMPCHas~GARS_A	AICARFT_IMPCHas~GARS_C	AICARFT_IMPCHas~GARS_N	AMP-binding~Aminotran_1_2	ATG_C~PH	Acetyltransf_1~DUF706	Aminotran_1_2~DapB_C	Ank_2~Fic	Arb2~FYVE	Bromodomain~COBRA1	C2~DUSP	C2~TBC	CAP_GLY~TBCC	CBM_25~Alpha-amylase	CBM_25~Glyco_hydro_31	CH~Myosin_head	CLASP_N~CAP_GLY	Calpain_III~WW	Cellulase~X8	Cu-oxidase_2~Zip	Cu-oxidase_3~Zip	DDHD~PX	DEK_C~Med26	DEP~ADP_ribosyl_GH	DFP~Lipase_3	DSPc~FYVE	DSPc~PH	DUF1162~PH	DUF1752~Pkinase	DUF699~zf-AN1	Dicty_CAR~Exo_endo_phos	DnaJ~CAP_GLY	DnaJ~FYVE	Drf_FH3~DUF2360	Dus~zf-met	ELMO_CED12~TLD	Epimerase~BTB	F-box-like~ZZ	FHA~B2-adapt-app_C	FHA~CHAT	FHA~NACHT
Plasmodium	3	MSP1_C~EGF_3	MSP1_C~EGF_MSP1_1	Met_10~PHF5
Pleosporaceae	2	COG2~Sec15	UPF0157~Acetyltransf_1
Poaceae	5	Dirigent~Jacalin	Myb_DNA-bind_3~DUF1423	Myb_DNA-binding~DUF3651	PMD~DUF724
Pucciniales	2	Glyco_hydro_61~CFEM	UCH~PDCD2_C
Rosales & Cucurbitales	2	Rubis-subs-bind~SET
rosids	14	TIR~LRR_4
Saccharomyces	2	SRP1_TIP1~PIR
Saccharomycetaceae	6	DEAD~Helicase_Sgs1	Helicase_C~Helicase_Sgs1	RQC~Helicase_Sgs1	Rap1-DNA-bind~Rap1_C
Saccharomycetales	9	PseudoU_synth_2~dCMP_cyt_deam_1
Schizosaccharomyces	2	Aconitase~Ribosomal_L21p	Aconitase_C~Ribosomal_L21p	COX15-CtaA~Fer2	DUF1720~WH2	FSH1~DHFR_1	Fibrinogen_BP~MIF4G	Fibrinogen_BP~eIF_4G1	Flavoprotein~Thymidylat_synt	Glyco_hydro_81~Carb_bind	Glyco_transf_22~Inhibitor_I78	NUDIX~TPK_B1_binding	NUDIX~TPK_catalytic	Palm_thioest~PAP2	ParA~WD40	Rsm22~CtaG_Cox11	adh_short~PIG-F	efhand_3~WH2	zf-CCCH~Acetyltransf_1
Smegmamorpha	2	LLGL~WD40
Sordariales	4	JmjC~SET
Sordariomycetes	8	efThoc1~Guanylate_kin
Teleostei	5	An_peroxidase~C1q
Tetraodontidae	2	7tm_1~PTB	Asparaginase_2~HIT	CDP-OH_P_transf~zf-C2H2	Carn_acyltransf~HIT	DEAD~Myosin_tail_1	EGF_2~Laminin_G_1	ER_lumen_recept~zf-C2H2	HIT~tRNA-synt_2	Homeobox~CH	Homeobox~DUF3585	I-set~EGF_2	Laminin_B~EGF_2	Laminin_G_1~EGF_2	Ldl_recept_a~EGF_2	Metallophos~THAP	OAR~CH	OAR~DUF3585	PPP5~THAP	Peptidase_C12~CH	TPR_1~THAP	Trypsin~Cupin_4	WW~Gal-3-0_sulfotr
Tetrapoda	14	DEAD~P68HR	Helicase_C~P68HR
Theileria	2	Fra10Ac1~DUF3161	Kelch_2~HATPase_c	RNase_P_Rpp14~NifU_N
Theria	9	BRCT_assoc~EIN3	C1-set~MHC_I_C	C2-set~CD4-extracel	Doppel~Prion	FHA~K167R	H-K_ATPase_N~Cation_ATPase_C	H-K_ATPase_N~Cation_ATPase_N	H-K_ATPase_N~Hydrolase	KRAB~BrkDBD	KRAB~DDE_1	KRAB~HTH_Tnp_Tc5	LRRNT~GnHR_trans	MHC_I~MHC_I_C	PAAD_DAPIN~zf-B_box	zf-C3HC4~EIN3
Thielavia	2	4HBT~APS_kinase	GST_N~DEAD	GST_N~Helicase_C	HGTP_anticodon~Maf
Tracheophyta	22	BTB~DUF3420	B_lectin~PAN_2	B_lectin~Pkinase_Tyr	DUF26~Pkinase	DUF26~Pkinase_Tyr	DnaJ~DUF3444	JmjC~FYRC	JmjC~FYRN	Kinesin~Kinesin-related	PAN_2~Pkinase	PAN_2~Pkinase_Tyr	S_locus_glycop~PAN_2	S_locus_glycop~Pkinase_Tyr	zf-C5HC2~FYRC	zf-C5HC2~FYRN
Trebouxiophyceae	2	ADH_N~Thioesterase	Cellulase~EGF_CA	Gly_transf_sug~Methyltransf_18	Homeobox~CAF1A	Pollen_allerg_1~Fasciclin	zf-C3HC4~NIF	zf-CCCH~U-box
Trebouxiophyceae & Chlorophyceae	4	FAD-oxidase_C~Fer4_7	FAD_binding_4~Fer4_7
Tremellaceae	2	Acyltransferase~Glycos_transf_1	Acyltransferase~PIGA	DUF1899~dUTPase	DUF1900~dUTPase	DUF1992~ABC1	DnaJ~SRR1	Epimerase~Exostosin	FCH~Acetyltransf_1	LRR_4~Abhydrolase_3	Lysine_decarbox~Aminotran_4	RhoGAP~Acetyltransf_1	Ricin_B_lectin~Cellulase	Rsm22~Pantoate_transf	WD40~dUTPase	WSC~Glyco_hydro_71	tRNA-synt_1b~SAICAR_synt	zf-C2H2_jaz~SRR1
Trichocomaceae	4	AreA_N~DUF1752	AreA_N~GATA	DUF2990~DUF3455	UDPGT~DAGAT
Trypanosomatidae	2	AIG2~PhosphMutase	AMP-binding~Fumble	ARD~DUF953	Alg14~Glyco_tran_28_C	Ank_2~6PF2K	Ank_2~His_Phos_1	ApbE~FAD_binding_2	ApbE~FAD_binding_6	ApbE~NAD_binding_1	CHAP~GSP_synth	CPSase_L_D2~Arginosuc_synth	CPSase_L_D3~Arginosuc_synth	CPSase_L_chain~Arginosuc_synth	CPSase_sm_chain~Arginosuc_synth	DUF1935~Peptidase_C2	DUF862~Glyco_hydro_85	Exo_endo_phos~Fumble	FYVE~Ras	Flagellar_rod~SH3_1	GAF~TIP41	GATase~Arginosuc_synth	Inhibitor_I29~DUF3586	Kinesin~Calpain_III	META~DUF1935	MGS~Arginosuc_synth	MORN~Pkinase	Methyltransf_16~GDI	Myosin_head~UBA	Peptidase_C1~DUF3586	Put_Phosphatase~DUF89	RNase_T~DNA_pol_A	RNase_T~PTS_2-RNA	Rhodanese~DUF1930	T5orf172~ResIII	Thioredoxin~Ufd2P_core	UBA~DUF1771	UBA~Smr	VHS~Kinesin	cNMP_binding~PAS	mRNA_cap_C~Pox_MCEL	ubiquitin~zf-UBR	zf-RanBP~FYVE	zf-RanBP~SPRY
Urochordata	3	Astacin~Trypsin	TSP_1~ShK	Trefoil~Trypsin	Trypsin~TSP_1
Urochordata & Vertebrata	22	Connexin~Connexin_CCC	Somatomedin_B~Phosphodiest
Viridiplantae	32	Response_reg~Myb_DNA-binding	zf-B_box~CCT
[truncated: 134 more columns]
