# Supplementary material for: This Déjà Vu Feeling—Analysis of Multidomain Protein Evolution in Eukaryotic Genomes
Source: PLoS Comput Biol. 2012 Nov 15;8(11):e1002701. doi: 10.1371/journal.pcbi.1002701 (PMC3499355; doi:10.1371/journal.pcbi.1002701)
Supplement: Table S9 — List of core domains. Summary of conditions used: protein predictions as listed in Table S1, domain models from Pfam 25.0, analyzed with HMMER 3.0, Pfam “gathering” cutoffs. The phylogenetic tree used is shown in Figure S1 and simplified in Figure 1. (XLS) [file pcbi.1002701.s015.xls]

## Sheet: upbiqutous_domains
Taxonomy	No. of genomes	Core Domains…
Aconoidasida	5	DUF528	s48_45
Agaricales	4	Pheromone
Amniota	13	BSP_II	Fanconi_A	Osteopontin	Phospholamban	TACI-CRD2
Apicomplexa	8	DUF3273
Apocrita	2	Apis_Csd
Arabidopsis	2	DUF1163	DUF1184	DUF287	DUF601	DUF626	Plant_all_beta	TAP35_44	Toxin_3
Archaeplastida	33	DUF2301	PLATZ	PSI_PSAK	RuBisCO_small
Arthropoda	11	CLIP	Chitin_bind_4	DM4_12	Eclosion
Bacillariophyta	3	Lact-deh-memb
Bilateria	44	Prox1	Troponin
Bilateria & Cnidaria	46	Activin_recp
Caenorhabditis	2	7TM_GPCR_Srb	7TM_GPCR_Sru	7TM_GPCR_Srz	CUB_2	Cytochrom_B562	DNA_PPF	DUF1096	DUF1164	DUF1179	DUF1248	DUF1265	DUF1412	DUF1459	DUF1505	DUF2700	DUF2708	DUF272	DUF281	DUF282	DUF3557	DUF508	DUF870	DX	DivIVA	EGL-1	ET	FBA_2	Glycoprotein	Lin-8	PHA-1	Pes-10	RSD-2	SPK	SspO	TRA-1_regulated	WSN	Xol-1_GHMP-like	Xol-1_N
Candida	2	DUF3246
Candida & Debaryomyces & Saccharomycetacea	8	DUF1892	DUF2578	DUF2702	EST1_DNA_bind	MetRS-N	Pho86	RPM2	SRP1_TIP1
Chlamydomonadales	2	2Fe-2S_Ferredox	DUF2322	DUF3707
Chlorophyta	9	DUF3181
Choanoflagellatea & Metazoa	50	GoLoco	Laminin_N	PET	Plexin_cytopl
Chromadorea (Nematoda)	4	7TM_GPCR_Srab	C6	CX	Caenor_Her-1	Col_cuticle_N	DUF236	DUF290	DUF644	Gp-FAR-1	Ground-like	Ly-6_related	MFP2b	Pepsin-I3	ZYG-11_interact
Ciona	2	Vanabin-2
Cnidaria	2	Lyase_N	Lyase_catalyt
Codonosigidae	2	Cohesin	DUF3574
Cryptosporidium	2	DUF3352	GP40	ScpA_ScpB
Diapsida	3	Apo-VLDL-II	Keratin
Dictyostelium	2	Coiled	DUF2185	DUF2383	Dict-STAT-coil	Dicty_CTDC	Dicty_REP	Dicty_spore_N	Endotoxin_C	Glyco_hydro_57	Inhibitor_I36	Thy1
Dikarya	55	STE3
Embryophyta	23	AUX_IAA	Auxin_inducible	AvrRpt-cleavage	BURP	Bet_v_1	CCT_2	COBRA	DELLA	DUF1005	DUF1068	DUF1191	DUF1218	DUF1423	DUF1639	DUF1644	DUF1675	DUF1677	DUF1817	DUF248	DUF260	DUF309	DUF3148	DUF3444	DUF3475	DUF3511	DUF3700	DUF3741	DUF538	DUF568	DUF569	DUF581	DUF593	DUF617	DUF623	DUF630	DUF632	DUF668	DUF688	DUF793	DUF794	DUF822	DUF868	DUF869	DUF966	Dirigent	ENOD93	FLO_LFY	Frigida
Endopterygota	8	Ins_allergen_rp
Euarchontoglires	5	Defensin_1	SNURF
Eumetazoa	47	DM	PBC	Strabismus	TLE_N	Zona_pellucida
Euphorbiaceae	2	NinG
Euteleostomi ("Vertebrata")	19	ACTH_domain	APOBEC_C	APOBEC_N	Asp-B-Hydro_N	Calcyon	Calpain_inhib	DUF1170	DUF1518	DUF1669	DUF1856	DUF3371	DUF3436	DUF3481	DUF3528	DUF776	Dysbindin	EZH2_WD-Binding	Fib_alpha	Filament_head	GCR	GHBP	GSG-1	Gastrin	GluR_Homer-bdg	Granin	HNF-1B_C	Homez	Hormone_1	Hormone_2	HoxA13_N	IKKbetaNEMObind	IL10	IL8	IRK_N	KCNQC3-Ank-G_bd	KCl_Cotrans_1	KcnmB2_inactiv	L6_membrane	LSR	Latrophilin	MAGP	MAGUK_N_PEST	MHC_I	Myelin_MBP	NMDAR2_C	NPP	Nuc_recep-AF1	Opiods_neuropep
Eutheria (Boreoeutheria)	8	BEX	CD45	Casein	Casein_kappa	HJURP_mid	IL13	IL2	MAGE_N	Protamine_P2	SLAM	TEP1_N	TP2
Hemichordata & Echinodermata (Ambulacraria)	2	Bindin	Disaggr_assoc
Holozoa	51	PID	efhand_2
Hominini	2	DUF3625	Metallothi_Euk2	OGFr_III	SPAN-X	Statherin
Kinetoplastida & Heterolobosea	3	DUF3592
Lepidoptera & Diptera	5	Cecropin
Magnoliophyta	21	DUF1117	DUF1195	DUF1221	DUF1262	DUF1666	DUF241	DUF295	DUF3357	DUF3403	DUF3774	DUF594	DUF642	DUF784	FBA_1	FBD	HD-ZIP_N	Metallothio_2	PMD	Pec_lyase_N	Remorin_N	WIYLD
Mamiellales	5	GYD
Mammalia	10	Bim_N	CSF-1	IFNGR1	Keratin_matx	Microcephalin	Neurokinin_B
Metazoa	48	ADAM_CR	DZF	Death	Ets	HSNSD	Hormone_recep	Integrin_alpha2	LEM	Ldl_recept_a	MH1	PDCD9	Pou	TF_AP-2	TGF_beta	Thyroglobulin_1	ZU5	wnt	zf-C4
Micromonas	2	DUF3516
Murinae	2	DUF1438	Lipoprotein_7
nematode Clade V	3	7TM_GPCR_Sra	7TM_GPCR_Srd	7TM_GPCR_Srh	7TM_GPCR_Sri	7TM_GPCR_Srj	7TM_GPCR_Srt	7TM_GPCR_Str	CC	DUF1182	DUF13	DUF267	DUF316	DUF621	DUF684	DUF713	DUF780	DUF976	Ins_beta	Srg
Neoptera	9	DUF1676	DUF243
Oligohymenophorea	2	DUF2816
Onygenales	2	DUF346
Pancrustacea	10	DUF1397	Hemocyanin_N	OS-D
Panicoideae	3	Zein
Papilionoideae	2	Albumin_I
Pelagophyceae & Bacillariophyta	4	DUF2872
Pezizomycotina & Saccharomycetales	30	PalH
Phytophthora	3	Elicitin	PcF
Plasmodium	3	CRA	DUF2081	Duffy_binding	EBA-175_VI	Inhibitor_I71	MSP1_C	MSP7_C	PfUIS3	TryThrA_C	Wx5_PLAF3D7
Poaceae	5	DUF1110	DUF1618	DUF1719
Saccharomycetaceae	6	Helicase_Sgs1	Nab2
Saccharomycetales	9	Gsf2	SAC3	Vhr1
Schizosaccharomyces	2	DIPSY	UPF0300
Tetrapoda	14	ITAM	KRAB	P68HR	Prion	Stonin2_N
Theileria	2	EMA	FAINT	RAP-1	Tash_PEST
Theria	9	ApoA-II	CD4-extracel	Doppel	H-K_ATPase_N	MAP1B_neuraxin	MHC_I_C	Macscav_rec	Osteoregulin	TP1
Tracheophyta	22	DUF1070	DUF1685	DUF26	DUF3049	DUF3420	DUF3527	DUF573	DUF620	DUF740	DUF863	GASA	KIP1	LEA_1	LEA_3	LEA_4	Lir1
Trichocomaceae	2	AreA_N	DUF2990
Trypanosomatidae	2	CesT	DUF1796	DUF1930	DUF1935	DUF3648	Flagellar_rod	KMP11	dUTPase_2
Urochordata & Vertebrata	22	Connexin	Connexin_CCC
Viridiplantae	32	DUF212	DUF3531	DUF3594	DUF506	GCS2	RcbX	Staygreen
[truncated: 30 more columns]
