# Supplementary material for: This Déjà Vu Feeling—Analysis of Multidomain Protein Evolution in Eukaryotic Genomes
Source: PLoS Comput Biol. 2012 Nov 15;8(11):e1002701. doi: 10.1371/journal.pcbi.1002701 (PMC3499355; doi:10.1371/journal.pcbi.1002701)
Supplement: Table S10 — Numbers of reappearing domain combinations. Summary of conditions used: protein predictions as listed in Table S1, domain models from Pfam 25.0, analyzed with HMMER 3.0, Pfam “gathering” cutoffs. The phylogenetic tree used is shown in Figure S1 and simplified in Figure 1. (XLS) [file pcbi.1002701.s016.xls]

## Sheet: Sheet1
No. of reappearance(s)	Count
1	25433
2	3486
3	1683
4	1082
5	843
6	578
7	426
8	272
9	232
10	152
11	137
12	109
13	69
14	54
15	34
16	42
17	42
18	23
19	13
20	12
21	16
22	12
23	2
24	9
25	7
26	1
27	3
28	3
29	2
32	1
