# Supplementary material for: This Déjà Vu Feeling—Analysis of Multidomain Protein Evolution in Eukaryotic Genomes
Source: PLoS Comput Biol. 2012 Nov 15;8(11):e1002701. doi: 10.1371/journal.pcbi.1002701 (PMC3499355; doi:10.1371/journal.pcbi.1002701)
Supplement: Table S11 — List of reappearing domain combinations. Summary of conditions used: protein predictions as listed in Table S1, domain models from Pfam 25.0, analyzed with HMMER 3.0, Pfam “gathering” cutoffs. The phylogenetic tree used is shown in Figure S1 and simplified in Figure 1. (XLS) [file pcbi.1002701.s017.xls]

## Sheet: additional_table_10_dc_reappear
Reappearance count	Domain Combination
2	2-oxoacid_dh~Pkinase
2	2OG-FeII_Oxy~GlcNAc
2	3-HAO~Cupin_2
2	3-alpha~Fer2
2	3HCDH_N~SE
2	4HB_MCP_2~HAMP
2	5_nucleotid_C~7tm_3
2	5_nucleotid_C~efhand
2	6PF2K~WD40
2	7TM_GPCR_Srw~7tm_1
2	7tm_1~7TM_GPCR_Srsx
2	7tm_1~BTB
2	7tm_1~COesterase
2	7tm_1~F5_F8_type_C
2	7tm_1~Fibrinogen_C
2	7tm_1~Lectin_C
2	7tm_1~Peptidase_S8
2	7tm_1~Pkinase
2	7tm_1~SAM_PNT
2	7tm_1~Trypsin
2	7tm_2~DEP
2	7tm_2~DUF3497
2	7tm_2~EGF_CA
2	7tm_2~Lectin_C
2	7tm_3~Abhydrolase_6
2	A2M~A2M_N
2	A2M~A2M_N_2
2	A2M~Methyltransf_FA
2	A2M_N~NTR
2	A2M_N_2~ANATO
2	A2M_N_2~Methyltransf_FA
2	A2M_comp~A2M
2	A2M_comp~A2M_N
2	A2M_comp~A2M_N_2
2	A2M_comp~Thiol-ester_cl
2	A2M_recep~A2M
2	A2M_recep~A2M_N
2	A2M_recep~A2M_comp
2	A2M_recep~Thiol-ester_cl
2	AAA~AAA_2
2	AAA~AAA_5
2	AAA~AAA_9
2	AAA~AARP2CN
2	AAA~BCDHK_Adom3
2	AAA~Cytochrom_C1
2	AAA~DNA_pol3_gamma3
2	AAA~DUF663
2	AAA~Death
2	AAA~Dynein_heavy
2	AAA~HATPase_c
2	AAA~MT
2	AAA~PEARLI-4
2	AAA~PHD
2	AAA~Pkinase
2	AAA~RPEL
2	AAA~Ribosomal_S28e
2	AAA~Synaptobrevin
2	AAA~WD40
2	AAA~zf-C3HC4
2	AAA_5~AAA_9
2	AAA_5~CbbQ_C
2	AAA_5~ClpB_D2-small
2	AAA_6~AAA
2	AAA_6~AAA_9
2	AAA_6~Ank_2
2	AAA_6~SOCS_box
2	AAA_7~Ank_2
2	AAA_7~SOCS_box
2	AAA_9~MT
2	AAA_PrkA~PrkA
2	AAR2~MA3
2	AAR2~MIF4G
2	AA_kinase~Acetyltransf_1
2	AA_kinase~Homoserine_dh
2	AA_kinase~Orn_DAP_Arg_deC
2	AA_permease~HMA
2	ABC1~Helicase_C
2	ABC1~Pkinase
2	ABC1~SNF2_N
2	ABC1~WaaY
2	ABC2_membrane~4HBT
2	ABC2_membrane_3~ABC_tran
2	ABC_membrane~Ank_2
2	ABC_membrane~GST_N
2	ABC_membrane~Pkinase
2	ABC_membrane_2~SbmA_BacA
2	ABC_tran~4HBT
2	ABC_tran~ABC2_membrane_3
2	ABC_tran~ABC_tran_2
2	ABC_tran~DUF258
2	ABC_tran~I-set
2	ABC_tran~NIL
2	ABC_tran~Pkinase
2	ABC_tran~Ribosomal_L18ae
2	ABC_tran~cNMP_binding
2	ABC_tran~cobW
2	ABC_tran_2~ABC_tran
2	ACBP~FYVE
2	ACBP~Kelch_1
2	ACBP~PH
2	ACR_tran~OEP
2	ACT~Homoserine_dh
2	ADAM_spacer1~GON
2	ADAM_spacer1~WAP
2	ADH_N~ABC_membrane
2	ADH_N~ABC_tran
2	ADH_N~Ketoacyl-synt_C
2	ADH_N~Zn_clus
2	ADH_N~ketoacyl-synt
2	ADH_zinc_N~AMP-binding
2	ADH_zinc_N~Chal_sti_synt_C
2	ADH_zinc_N~Chal_sti_synt_N
2	ADH_zinc_N~Condensation
2	ADK~Ank_2
2	ADP_PFK_GK~Acyl_transf_1
2	AIG1~zf-C3HC4
2	ALMT~efhand
2	AMA-1~EBA-175_VI
2	AMOP~EGF_CA
2	AMOP~SEA
2	AMP-binding~2OG-FeII_Oxy
2	AMP-binding~ABC_membrane
2	AMP-binding~ADH_N
2	AMP-binding~Aminotran_5
2	AMP-binding~Catalase
2	AMP-binding~SKI
2	AMP-binding~TPP_enzyme_C
2	AMP-binding~TPP_enzyme_N
2	AMP-binding~zf-C3HC4
2	ANATO~A2M
2	ANF_receptor~Lig_chan
2	ANF_receptor~Lig_chan-Glu_bd
2	ANF_receptor~PDEase_I
2	ANTH~I_LWEQ
2	AP2~Hist_deacetyl
2	APC10~Cullin_Nedd8
2	APC10~IBR
2	APC8~TPR_2
2	APC_15aa~APC_crr
2	APC_crr~SAMP
2	APH~PHD
2	APH~Zeta_toxin
2	APS_kinase~ATP-sulfurylase
2	AP_endonuc_2~AP_endonuc_2_N
2	ARID~Amino_oxidase
2	ARID~DUF3518
2	ARID~HMG_box
2	ARID~SWIRM
2	ASC~CUB
2	ASC~F5_F8_type_C
2	ASC~Ldl_recept_a
2	ATP-grasp_2~Acetyltransf_1
2	ATP-grasp_3~GARS_A
2	ATP-sulfurylase~APS_kinase
2	ATP-synt~Bromo_TP
2	ATP-synt_C~Pkinase
2	ATP-synt_C~Sad1_UNC
2	ATP-synt_ab~ATP-synt_DE_N
2	ATP-synt_ab_C~ATP-synt_DE_N
2	ATP_bind_1~Clp1
2	ATP_bind_3~TilS_C
2	AT_hook~zf-C2H2
2	Abhydro_lipase~Abhydrolase_5
2	Abhydrolase_2~CBM_1
2	Abhydrolase_3~adh_short
2	Abhydrolase_5~CBM_1
2	Abhydrolase_5~Ribosomal_S10
2	Abhydrolase_5~zf-RanBP
2	Abhydrolase_6~Ank_2
2	Abhydrolase_6~DAGAT
2	Abhydrolase_6~Pkinase_Tyr
2	Abhydrolase_6~SAM_2
2	Abhydrolase_6~TFIIB
2	Abhydrolase_6~TF_Zn_Ribbon
2	Abi_HHR~SH3_2
2	Acetyltransf_1~PARP
2	Act-Frag_cataly~DSPc
2	Actin~RRM_1
2	Acyl-CoA_dh_1~DUF1974
2	Acyl-CoA_dh_N~DUF1974
2	Acyl_transf_1~ACPS
2	Acyl_transf_1~Chal_sti_synt_C
2	Acyl_transf_1~Chal_sti_synt_N
2	Acyl_transf_1~p450
2	Acyltransferase~AMP-binding
2	Adaptin_N~B2-adapt-app_C
2	Adaptin_N~Cnd1
2	Adeno_E3_CR2~Pkinase_Tyr
2	AdoHcyase_NAD~AdoHcyase
2	AdoMetDC_leader~SAM_decarbox
2	AdoMet_dc~Spermine_synth
2	Aft1_HRA~Aft1_HRR
2	Aft1_HRR~bZIP_1
2	Aft1_OSA~Aft1_HRR
2	Agenet~DUF724
2	Agenet~PHD
2	Ago_hook~RRM_1
2	AlaDh_PNT_N~AlaDh_PNT_C
2	Ald_Xan_dh_C2~FAD_binding_5
2	Ald_Xan_dh_C~CO_deh_flav_C
2	Ald_Xan_dh_C~FAD_binding_5
2	Aldedh~ANF_receptor
2	Aldo_ket_red~A_deamin
2	Aldo_ket_red~PQQ
2	Aldo_ket_red~ShK
2	Allantoicase~Ank_2
2	Allantoicase~DIL
2	Alpha-amylase~Alpha-amyl_C2
2	Alpha-mann_mid~Glyco_hydro_38
2	Alpha-mann_mid~Glyco_hydro_38C
2	Amidase~DEAD_2
2	Amidase~MFS_1
2	Amidohydro_1~Amidohydro_3
2	Amidohydro_1~Peptidase_M20
2	Amino_oxidase~Ank_2
2	Amino_oxidase~CMAS
2	Amino_oxidase~GDI
2	Amino_oxidase~Lipase_GDSL
2	Aminotran_1_2~DapB_N
2	Aminotran_3~C2
2	Aminotran_3~Kinesin
2	An_peroxidase~Sushi
2	Ank~C2
2	Ank~CARD
2	Ank~CH
2	Ank~CorA
2	Ank~Death
2	Ank~G-patch
2	Ank~LEM
2	Ank~OST_LOTUS
2	Ank~RRM_1
2	Ank~RasGEF_N
2	Ank~Sec7
2	Ank~ThiF
2	Ank~Thioredoxin
2	Ank~UBACT
2	Ank~UBA_e1_thiolCys
2	Ank~WW
2	Ank~ZU5
2	Ank_2~AA_permease
2	Ank_2~Anoctamin
2	Ank_2~Armet
2	Ank_2~CRAL_TRIO
2	Ank_2~Chromo
2	Ank_2~DEAD
2	Ank_2~Dynamin_N
2	Ank_2~F5_F8_type_C
2	Ank_2~FH2
2	Ank_2~GIT1_C
2	Ank_2~GIT_SHD
2	Ank_2~Glyco_hydro_20b
2	Ank_2~Guanylate_cyc
2	Ank_2~I-set
2	Ank_2~MFS_1
2	Ank_2~Mcp5_PH
2	Ank_2~Methyltransf_16
2	Ank_2~OST_LOTUS
2	Ank_2~PI3_PI4_kinase
2	Ank_2~Patatin
2	Ank_2~Peptidase_S8
2	Ank_2~Pre-SET
2	Ank_2~RIIa
2	Ank_2~RRM_1
2	Ank_2~Rap_GAP
2	Ank_2~RasGEF_N
2	Ank_2~RhoGEF
2	Ank_2~Ribonuc_2-5A
2	Ank_2~SH3_1
2	Ank_2~SNF2_N
2	Ank_2~Sec7
2	Ank_2~SecA_DEAD
2	Ank_2~Tctex-1
2	Ank_2~ThiF
2	Ank_2~UBACT
2	Ank_2~UBA_e1_thiolCys
2	Ank_2~UvrD-helicase
2	Ank_2~WD40
2	Ank_2~zf-CCCH
2	Ank_2~zf-TRAF
2	Annexin~Glyco_transf_20
2	Annexin~Trehalose_PPase
2	Anth_Ig~Ant_C
2	Anth_synt_I_N~Chorismate_bind
2	Apc13p~zf-AN1
2	Apc1~PC_rep
2	Apc3~DnaJ
2	Apc3~SGS
2	Apc3~TPR_1
2	ArabFuran-catal~AbfB
2	Arabinose_bd~HTH_18
2	ArfGap~DENN
2	ArfGap~GIT1_C
2	ArfGap~GIT_SHD
2	ArfGap~SH3_1
2	ArfGap~SH3_2
2	ArfGap~dDENN
2	ArfGap~uDENN
2	ArgK~MM_CoA_mutase
2	Arg_repressor~Arg_repressor_C
2	Arg_tRNA_synt_N~tRNA-synt_1d
2	Arm~APC_15aa
2	Arm~BTB
2	Arm~DUF634
2	Arm~HECT
2	Arm~Patatin
2	Arm~Pkinase
2	Arm~RhoGEF
2	Arm~SAMP
2	Arm~TIR
2	Arm~V-ATPase_H_N
2	Arrestin_C~FYVE
2	Arrestin_C~cNMP_binding
2	Arrestin_N~Sugar_tr
2	Arrestin_N~cNMP_binding
2	Arylsulfotrans~MFS_1
2	Asp-B-Hydro_N~Asp_Arg_Hydrox
2	Asp~Ank_2
2	Asp~NDK
2	Asp_Arg_Hydrox~Sulfotransfer_1
2	Asp_protease~DnaJ
2	Asparaginase_2~tRNA-synt_2
2	Astacin~EGF
2	Astacin~F5_F8_type_C
2	Astacin~I-set
2	Astacin~Ldl_recept_a
2	Astacin~MAM
2	Astacin~Sushi
2	Autoind_bind~GerE
2	Autophagy_N~Autophagy_Cterm
2	Autophagy_act_C~Autophagy_Cterm
2	Auxin_resp~Bromodomain
2	Avl9~MORN
2	B12-binding~Radical_SAM
2	B3~DUF724
2	B3_4~FDX-ACB
2	B9~C1_1
2	B9~PDZ
2	B9~RGS-like
2	BACK~NHL
2	BACK~TPR_1
2	BAH~HMG_box
2	BAH~Pkinase_Tyr
2	BAH~RRM_1
2	BAH~TFIIS_M
2	BIR~NACHT
2	BLUF~Guanylate_cyc
2	BNIP2~CRAL_TRIO
2	BON~LysM
2	BRAP2~zf-rbx1
2	BRCT~AAA
2	BRCT~Ank
2	BRCT~Ank_2
2	BRCT~DNA_ligase_A_M
2	BRCT~Microcephalin
2	BRCT~Myb_DNA-bind_2
2	BRCT~NTP_transf_2
2	BRCT~PHD
2	BRCT~zf-CCHH
2	BRCT_assoc~BRCT
2	BRK~SPOC
2	BRK~TFIIS_M
2	BT1~TIM21
2	BTAD~TPR_1
2	BTB~Bromodomain
2	BTB~CAP_GLY
2	BTB~DEAD
2	BTB~LSM
2	BTB~NHL
2	BTB~RRM_1
2	BTB~SAP
2	BTB~Slx4
2	BTB~bZIP_1
2	BTB~efhand
2	BTB~ubiquitin
2	BTG~PAM2
2	B_lectin~DUF3660
2	B_lectin~MatE
2	B_lectin~PAN_1
2	Bac_DnaA~Bac_DnaA_C
2	Bac_Ubq_Cox~Cyto_ox_2
2	Bac_rhamnosid_N~Gal_Lectin
2	Bac_rhodopsin~Guanylate_cyc
2	Bac_rhodopsin~HisKA
2	Bac_rhodopsin~Response_reg
2	Band_3_cyto~HCO3_cotransp
2	Beach~ELMO_CED12
2	Beta-lactamase~DAP_B
2	Beta_elim_lyase~Fungal_trans
2	BicD~UBA
2	Biotin_carb_C~ACC_central
2	Biotin_lipoyl~Pkinase
2	Biotin_lipoyl~Transketolase_C
2	Bmp~7tm_3
2	BolA~ACBP
2	Branch~Xylo_C
2	Brix~PH
2	BrkDBD~PDT
2	Bromodomain~Ank_2
2	Bromodomain~Chromo
2	Bromodomain~FYRN
2	Bromodomain~GATA
2	Bromodomain~Pkinase
2	Bromodomain~Synaptobrevin
2	Bromodomain~WD40
2	Bromodomain~zf-CW
2	C1-set~V-set
2	C1_1~CNH
2	C1_1~PH
2	C1_1~Pex24p
2	C1_1~Pkinase
2	C1_1~Pkinase_Tyr
2	C1_1~RA
2	C1_1~Y_phosphatase
2	C1_3~C1_1
2	C1q~Collagen
2	C2-set_2~I-set
2	C2-set_2~Pkinase_Tyr
2	C2-set_2~SPRY
2	C2~Arrestin_C
2	C2~CBM_5_12
2	C2~CUE
2	C2~Calpain_III
2	C2~DUF1041
2	C2~DUF1154
2	C2~DUF1765
2	C2~FH2
2	C2~GRAM
2	C2~LRRNT_2
2	C2~Mcp5_PH
2	C2~Myotub-related
2	C2~Nexin_C
2	C2~PI-PLC-Y
2	C2~Peptidase_C2
2	C2~Peptidase_M16
2	C2~Pkinase_Tyr
2	C2~Rap_GAP
2	C2~SAM_1
2	C2~TerD
2	C2~efhand
2	C8~EGF_3
2	C8~Kunitz_BPTI
2	C8~TIL
2	C8~TSP_1
2	C8~VWA
2	C8~fn3
2	CAF1~zf-DHHC
2	CAF1C_H4-bd~eIF2A
2	CAP~Crisp
2	CAP~EGF_CA
2	CAP~GPS
2	CAP~LIM
2	CAP~Myotub-related
2	CAP~Skp1
2	CAP_C~SIR2
2	CAP_GLY~Ank_2
2	CAP_GLY~FH2
2	CAP_GLY~PCI
2	CAP_GLY~eIF-3c_N
2	CAP_GLY~efhand
2	CAP_N~CAP_C
2	CARD~Ank
2	CARD~Kelch_1
2	CARD~NACHT
2	CARD~Pkinase
2	CARD~SH3_2
2	CARD~WD40
2	CARD~fn3
2	CBFNT~TonB_dep_Rec
2	CBM_14~C8
2	CBM_14~Cys_knot
2	CBM_14~EGF
2	CBM_14~EGF_3
2	CBM_14~F5_F8_type_C
2	CBM_14~Kringle
2	CBM_14~Ldl_recept_a
2	CBM_14~PAN_1
2	CBM_14~Polysacc_deac_1
2	CBM_14~VWD
2	CBM_1~Glyco_hydro_45
2	CBM_20~Helicase_C
2	CBM_20~SNF2_N
2	CBM_20~cNMP_binding
2	CBM_2~Glyco_hydro_18
2	CBM_6~Alpha-L-AF_C
2	CBS~IMPDH
2	CBS~MgtE
2	CBS~Ribosomal_S2
2	CCT_2~tify
2	CDC50~Pkinase
2	CENP-B_N~Cenp-B_dimeris
2	CH~C2
2	CH~Cofilin_ADF
2	CH~EB1
2	CH~LIM
2	CH~PH
2	CH~RasGEF
2	CH~RasGEF_N
2	CH~SH3_2
2	CH~TBC
2	CHASE~PDEase_I
2	CIMR~HLH
2	CIMR~Man-6-P_recep
2	CLASP_N~Cnd1
2	CLCA_N~DUF1973
2	CLN3~Abhydrolase_3
2	CMAS~WW
2	CMD~Abhydrolase_6
2	CM_2~ACT
2	CNH~Pkinase
2	CN_hydrolase~HIT
2	COG5~Sec15
2	COG6~DUSP
2	COG6~PX
2	COMP~EGF_CA
2	COMP~TSP_C
2	COPIIcoated_ERV~Ank
2	COPIIcoated_ERV~PIP5K
2	COPI_assoc~NTP_transf_2
2	COX1~FixO
2	COX1~LAGLIDADG_1
2	COesterase~DnaJ
2	COesterase~ShK
2	CP2~SAM_1
2	CRAL_TRIO~CRAL_TRIO_N
2	CRAL_TRIO~Motile_Sperm
2	CRAL_TRIO~Y_phosphatase
2	CRC_subunit~PHD
2	CS~Pro_isomerase
2	CS~Sel1
2	CSD~R3H
2	CUB~7tm_1
2	CUB~ASC
2	CUB~C8
2	CUB~DUF3497
2	CUB~EGF
2	CUB~Filamin
2	CUB~Fz
2	CUB~GPS
2	CUB~Gal_Lectin
2	CUB~Kringle
2	CUB~Ldl_recept_b
2	CUB~Lectin_C
2	CUB~MAM
2	CUB~PKD_channel
2	CUB~PLAT
2	CUB~Pkinase_Tyr
2	CUB~SRCR
2	CUB~Sushi
2	CUB~Trypsin
2	CUB~V-set
2	CUB~VWD
2	CUB~WSC
2	CUB~Zona_pellucida
2	CUB~hEGF
2	CUE~Helicase_C
2	CUE~IBR
2	CUE~SNF2_N
2	CUE~Zeta_toxin
2	CUE~zf-RanBP
2	CUT~CASP_C
2	CXCXC~Tmemb_9
2	Cache_1~HAMP
2	Cadherin~7tm_2
2	Cadherin~Cadherin_2
2	Cadherin~F5_F8_type_C
2	Cadherin~HRM
2	Cadherin~hEGF
2	Cadherin_pro~Cadherin
2	Calsequestrin~Thioredoxin
2	Calx-beta~7tm_2
2	Calx-beta~EGF
2	Calx-beta~Filamin
2	Calx-beta~Laminin_G_2
2	Calx-beta~PAN_1
2	Calx-beta~Pkinase_Tyr
2	CarD_TRCF~DEAD
2	CarD_TRCF~Helicase_C
2	Carb_anhydrase~Pentaxin
2	Carn_acyltransf~Asparaginase_2
2	Carn_acyltransf~tRNA-synt_2
2	Cast~RBD-FIP
2	Catalase-rel~Catalase
2	Cation_ATPase_C~ATP_Ca_trans_C
2	Cauli_VI~PIF1
2	Cbl_N~Cbl_N2
2	Cbl_N~Cbl_N3
2	Cellulase~CBM49
2	Cellulase~Ricin_B_lectin
2	Cementoin~WAP
2	ChAPs~TPR_1
2	ChaC~PUA
2	CheR_N~CheR
2	Chitin_bind_1~Barwin
2	Chitin_bind_1~DUF1929
2	Chitin_bind_1~Glyoxal_oxid_N
2	Chitin_synth_2~SAM_1
2	Chitin_synth_2~SAM_2
2	Choline_kinase~Ank_2
2	Chon_Sulph_att~Neural_ProG_Cyt
2	Chorein_N~DUF1162
2	Chorismate_bind~TPP_enzyme_N
2	Chromo~Bromodomain
2	Chromo~DNA_methylase
2	Chromo~ECH
2	Chromo~GTP_EFTU_D2
2	Chromo~HDA2-3
2	Chromo~PHD
2	Chromo~Pkinase
2	Chromo~Pkinase_Tyr
2	Chromo~eIF2_C
2	CitMHS~TrkA_C
2	Clathrin~zf-C3HC4
2	Cnl2_NKP2~Ctf8
2	CoA_binding~Acetyltransf_1
2	CoA_binding~Cys_Met_Meta_PP
2	Cobalamin_bind~SLBB
2	Cobl~WH2
2	Cofilin_ADF~PH
2	Coiled-coil_56~RrnaAD
2	Collagen~C1q
2	Collagen~CBM_14
2	Collagen~EGF_CA
2	Collagen~Fibrinogen_C
2	Collagen~I-set
2	Collagen~Resistin
2	Collagen~Surfac_D-trimer
2	Complex1_49kDa~NADHdh
2	Connexin~Connexin43
2	Connexin_CCC~Connexin43
2	Copine~Ion_trans_2
2	CortBP2~Ank_2
2	Cortex-I_coil~Spindle_Spc25
2	Crystallin~HSP20
2	Ctr~HMA
2	Cu-oxidase~F5_F8_type_C
2	Cu2_monoox_C~Cu2_monooxygen
2	Cullin~IBR
2	Cullin_Nedd8~IBR
2	Cupin_2~HTH_18
2	Cupin_4~GCC2_GCC3
2	Cut8~RRM_1
2	Cyclin_N~DnaJ
2	Cyt-b5~Acyl-CoA_dh_1
2	Cyt-b5~Acyl-CoA_dh_M
2	Cyt-b5~Acyl-CoA_dh_N
2	Cyt-b5~FHA
2	CytB6-F_Fe-S~Rieske
2	Cyto_heme_lyase~Kinesin
2	Cytochrom_B559a~Cytochrom_B559
2	Cytochrom_B559a~PsbL
2	Cytochrom_B561~Cyt-b5
2	Cytochrom_C~Cytochrom_D1
2	Cytochrom_D1~WD40
2	DAGK_cat~DAGK_acc
2	DAO~DUF1667
2	DAO~Pyr_redox_2
2	DBD_Tnp_Mut~MULE
2	DBD_Tnp_Mut~PMD
2	DBD_Tnp_Mut~SWIM
2	DBR1~DREV
2	DCX~FGF
2	DCX~Pkinase
2	DCX~WD40
2	DDE_1~Cenp-B_dimeris
2	DDE_1~Dimer_Tnp_hAT
2	DDE_1~HTH_psq
2	DDE_1~UCH
2	DDHD~LNS2
2	DDHD~PH
2	DEAD~DEAD_2
2	DEAD~DUF2183
2	DEAD~HATPase_c
2	DEAD~HSP90
2	DEAD~Myosin_head
2	DEAD~Peptidase_S9
2	DEAD~R3H
2	DEAD~RRM_1
2	DEAD~Ribosomal_S24e
2	DEAD~SH3_1
2	DEAD~SPRY
2	DEAD~UPF0052
2	DEAD~zf-AN1
2	DEAD~zf-RanBP
2	DED~DEAD
2	DED~NB-ARC
2	DED~NHL
2	DEK_C~HMG_box
2	DENN~Myotub-related
2	DEP~Ank
2	DEP~C2
2	DEP~CNH
2	DEP~FYVE
2	DEP~GAF
2	DEP~GSHPx
2	DEP~PI3_PI4_kinase
2	DEP~Pkinase
2	DEP~Pyr_redox_2
2	DEP~Pyr_redox_dim
2	DEP~RA
2	DEP~Rap_GAP
2	DHBP_synthase~DMRL_synthase
2	DHC_N1~AAA_5
2	DHC_N1~Dynein_heavy
2	DHC_N1~MT
2	DHC_N2~AAA
2	DHC_N2~AAA_9
2	DHC_N2~Ank_2
2	DHC_N2~SOCS_box
2	DHDPS~Saccharop_dh_N
2	DHHA2~BNIP2
2	DHHA2~CRAL_TRIO
2	DHO_dh~Fer4
2	DIT1_PvcA~ABC2_membrane
2	DIT1_PvcA~ABC_tran
2	DIT1_PvcA~PDR_CDR
2	DIT1_PvcA~TauD
2	DIX~Dishevelled
2	DIX~PDZ
2	DLL_N~Homeobox
2	DMPK_coil~PH
2	DNA_ligase_A_N~PTCB-BRCT
2	DNA_methylase~Helicase_C
2	DNA_methylase~Pkinase_Tyr
2	DNA_pol3_gamma3~DUF3646
2	DNA_pol_A_exo1~Acyltransferase
2	DNA_pol_A_exo1~KH_1
2	DNA_primase_lrg~PseudoU_synth_1
2	DNMT1-RFD~DDT
2	DOMON~Cyt-b5
2	DOMON~FAD_binding_8
2	DOMON~Ferric_reduct
2	DOMON~NAD_binding_1
2	DOMON~NAD_binding_6
2	DOMON~SRCR
2	DPBB_1~LysM
2	DSL~Pacifastin_I
2	DSPc~FHA
2	DSPc~LIM
2	DSPc~TIP41
2	DTW~zf-CCHC
2	DUF1041~C2
2	DUF1041~Membr_traf_MHD
2	DUF1053~Guanylate_cyc
2	DUF1081~ApoB100_C
2	DUF1083~ABC2_membrane
2	DUF1083~ABC_tran
2	DUF1154~PLC-beta_C
2	DUF1162~PDZ
2	DUF1162~PX
2	DUF1336~DUF654
2	DUF1394~FragX_IP
2	DUF159~DUF1977
2	DUF159~DnaJ
2	DUF1619~C1_1
2	DUF1619~PDZ
2	DUF1619~RGS-like
2	DUF1632~Ion_trans
2	DUF1632~cNMP_binding
2	DUF1675~NTF2
2	DUF1675~RRM_1
2	DUF1680~AbfB
2	DUF1720~RhoGEF
2	DUF1729~Acyl_transf_1
2	DUF1729~MaoC_dehydratas
2	DUF1736~FAT
2	DUF1765~PH
2	DUF1772~AMP-binding
2	DUF1777~G-patch
2	DUF1777~OB_NTP_bind
2	DUF1891~2OG-FeII_Oxy
2	DUF1891~Methyltransf_11
2	DUF1891~RRM_1
2	DUF1899~Gelsolin
2	DUF1899~VHP
2	DUF1943~ApoB100_C
2	DUF1956~HlyD
2	DUF1966~CBM_20
2	DUF1973~CLCA_N
2	DUF1985~Peptidase_C48
2	DUF1996~ADH_zinc_N
2	DUF2064~Glycos_transf_2
2	DUF2196~RRM_1
2	DUF21~DUF3464
2	DUF2215~CYSTM
2	DUF221~DUF3779
2	DUF2235~Miro
2	DUF2235~WD40
2	DUF223~PIF1
2	DUF227~DUF1679
2	DUF2305~Helicase_C
2	DUF2305~SNF2_N
2	DUF2349~DUF2448
2	DUF2358~SOUL
2	DUF2362~UBA
2	DUF2404~C1_1
2	DUF2407~PTPS
2	DUF2422~DUF939
2	DUF2427~Ytp1
2	DUF2431~GTP1_OBG
2	DUF2431~MMR_HSR1
2	DUF2450~Sec15
2	DUF2458~Abhydrolase_6
2	DUF248~Flavodoxin_1
2	DUF258~PDR_CDR
2	DUF262~HNH
2	DUF294~TPR_2
2	DUF3223~RRN3
2	DUF3317~Ras
2	DUF3342~HSP33
2	DUF3354~Ras
2	DUF3354~SAP
2	DUF3403~B_lectin
2	DUF3403~PAN_2
2	DUF3403~Pkinase_Tyr
2	DUF3403~S_locus_glycop
2	DUF3414~Cullin
2	DUF3414~Cullin_Nedd8
2	DUF3479~CobN-Mg_chel
2	DUF3504~K_tetra
2	DUF3535~RNase_T
2	DUF3535~UCH
2	DUF3552~HD
2	DUF3552~KH_1
2	DUF3554~ParcG
2	DUF3554~Ribosomal_L19e
2	DUF3591~ubiquitin
2	DUF3660~DUF3403
2	DUF3660~Pkinase_Tyr
2	DUF3670~Helicase_C
2	DUF3670~SNF2_N
2	DUF3694~TBC
2	DUF3733~LRR_4
2	DUF3808~TPR_1
2	DUF3808~TPR_2
2	DUF393~Thioredoxin
2	DUF477~zf-C3HC4
2	DUF477~zf-rbx1
2	DUF500~UBA
2	DUF504~AKAP7_NLS
2	DUF577~HEAT
2	DUF608~GBA2_N
2	DUF616~Dirigent
2	DUF618~DUF1777
2	DUF619~Semialdhyde_dh
2	DUF667~Nup160
2	DUF676~DDHD
2	DUF716~Peptidase_M10
2	DUF729~FH2
2	DUF772~DDE_Tnp_1
2	DUF814~Neurochondrin
2	DUF814~zf-CCHC
2	DUF819~FAD_binding_8
2	DUF819~NAD_binding_6
2	DUF862~Kinesin
2	DUF862~PUB
2	DUF902~KAT11
2	DUF902~ZZ
2	DUF902~zf-TAZ
2	DUF914~TPT
2	DUF924~ATP_bind_3
2	DUF959~Collagen
2	DUF959~Endostatin
2	DUSP~adh_short
2	DUSP~zf-MYND
2	DWNN~zf-C3HC4
2	DWNN~zf-Nse
2	Dala_Dala_lig_C~Dala_Dala_lig_N
2	Dala_Dala_lig_C~SET
2	DctM~DUF3394
2	Death~Ank
2	Death~Ank_2
2	Death~DEAD
2	Death~DED
2	Death~FA_hydroxylase
2	Death~Helicase_C
2	Death~I-set
2	Death~Miro
2	Death~NHL
2	Death~Ras
2	Death~WD40
2	DegT_DnrJ_EryC1~Epimerase
2	Dev_Cell_Death~Kelch_1
2	Dickkopf_N~Prokineticin
2	Dicty_CAR~PIP5K
2	Dimer_Tnp_hAT~Pkinase
2	Dishevelled~Dsh_C
2	Disintegrin~TSP_1
2	Dna2~CbiA
2	DnaJ~ADH_N
2	DnaJ~ADH_zinc_N
2	DnaJ~Armet
2	DnaJ~BRO1
2	DnaJ~Collagen
2	DnaJ~Dehydrin
2	DnaJ~Fer4
2	DnaJ~Ion_trans
2	DnaJ~SAM_1
2	DnaJ~Tim17
2	DnaJ~U-box
2	DnaJ~WW
2	DnaJ~zf-MYND
2	DnaJ_C~BRO1
2	DnaJ_CXXCXGXG~BRO1
2	Dpy-30~IQ
2	Drf_FH1~FH2
2	Drf_FH3~RasGEF
2	Drf_FH3~RasGEF_N
2	Drf_GBD~DUF729
2	Duffy_binding~EBA-175_VI
2	Dynamin_M~Dynamin_N
2	Dynamin_M~PH
2	Dynamin_N~WD40
2	Dynein_heavy~SOCS_box
2	E1-E2_ATPase~ATP_Ca_trans_C
2	E1-E2_ATPase~HMA
2	E1-E2_ATPase~NicO
2	E1-E2_ATPase~RCC1
2	E2F_TDP~DP
2	EAL~HDOD
2	EB~Polysacc_deac_1
2	ECH~PP-binding
2	EFP~Elong-fact-P_C
2	EFP_N~eIF-5a
2	EF_assoc_1~Miro
2	EGF~7tm_2
2	EGF~AMOP
2	EGF~Astacin
2	EGF~C1q
2	EGF~Cadherin
2	EGF~DUF3497
2	EGF~EGF_CA
2	EGF~F5_F8_type_C
2	EGF~HRM
2	EGF~Matrilin_ccoil
2	EGF~NIDO
2	EGF~PLAT
2	EGF~REJ
2	EGF~ShK
2	EGF~Thyroglobulin_1
2	EGF~Trefoil
2	EGF~WD40
2	EGF~Y_phosphatase
2	EGF~fn1
2	EGF~fn3
2	EGF_2~Ank_2
2	EGF_2~C8
2	EGF_2~CUB
2	EGF_2~Cadherin_C
2	EGF_2~Calx-beta
2	EGF_2~FMN_red
2	EGF_2~Integrin_b_cyt
2	EGF_2~Pkinase_Tyr
2	EGF_2~Zona_pellucida
2	EGF_3~EGF_MSP1_1
2	EGF_3~Lectin_C
2	EGF_3~Sushi
2	EGF_3~VWA
2	EGF_3~VWD
2	EGF_CA~C8
2	EGF_CA~CBM_14
2	EGF_CA~Collagen
2	EGF_CA~EGF_MSP1_1
2	EGF_CA~Fibrinogen_C
2	EGF_CA~Kunitz_BPTI
2	EGF_CA~MAM
2	EGF_CA~Matrilin_ccoil
2	EGF_CA~PLAT
2	EGF_CA~Pacifastin_I
2	EGF_CA~Pkinase
2	EGF_CA~TIG
2	EGF_CA~TILa
2	EGF_CA~Thyroglobulin_1
2	EGF_CA~VWA
2	EGF_CA~VWD
2	EGF_CA~Y_phosphatase
2	EGF_CA~fn3
2	EGF_MSP1_1~EGF_CA
2	EGF_MSP1_1~Ldl_recept_b
2	EGF_alliinase~Alliinase_C
2	EKR~FAD_binding_1
2	EKR~Flavodoxin_1
2	EKR~NAD_binding_1
2	ELL~Occludin_ELL
2	ELM2~GATA
2	ELMO_CED12~zf-C2H2_jaz
2	EMI~Collagen
2	EMP70~Abhydrolase_3
2	ENTH~ArfGap
2	ENTH~Telomere_reg-2
2	EOS1~Galactosyl_T
2	EOS1~Gb3_synth
2	EPL1~PHD
2	ERO1~Cyt-b5
2	ERO1~FAD_binding_2
2	ESCRT-II~DMRL_synthase
2	ETRAMP~PfUIS3
2	EamA~HMG_box
2	EamA~Pkinase
2	Elicitin~PT
2	Endosulfine~DNA_pol_E_B
2	Endosulfine~Pol_alpha_B_N
2	Ephrin_lbd~Pkinase_Tyr
2	Ephrin_lbd~fn3
2	Epimerase~EGF_3
2	Epimerase~FYVE
2	Epimerase~Glyco_transf_8
2	Es2~IBR
2	Esterase~ADH_N
2	Esterase~ADH_zinc_N
2	Esterase~AMP-binding
2	Esterase~Condensation
2	Exo_endo_phos~Ank_2
2	Exo_endo_phos~DUF3462
2	Exo_endo_phos~FYVE
2	Exo_endo_phos~PAP_RNA-bind
2	Exo_endo_phos~Pkinase
2	Exo_endo_phos~RCC1
2	Exo_endo_phos~RRM_1
2	Exo_endo_phos~Ras
2	Exo_endo_phos~SAM_1
2	Exo_endo_phos~WD40
2	Exo_endo_phos~zf-C3HC4
2	Exo_endo_phos~zf-HIT
2	Exo_endo_phos~zf-PARP
2	Exostosin~Mur_ligase_M
2	F-box-like~APH
2	F-box-like~Cyt-b5
2	F-box-like~DUF3506
2	F-box-like~FIST_C
2	F-box-like~Helicase_C
2	F-box-like~Homeobox
2	F-box-like~IBR
2	F-box-like~Kinesin
2	F-box-like~LRR_2
2	F-box-like~Peptidase_M16
2	F-box-like~Peptidase_M16_C
2	F-box-like~Ras
2	F-box-like~Sel1
2	F-box~APH
2	F-box~Actin
2	F-box~Ank
2	F-box~Cyclin_N
2	F-box~DUF295
2	F-box~DUF3506
2	F-box~RhoGEF
2	F5_F8_type_C~7tm_2
2	F5_F8_type_C~ASC
2	F5_F8_type_C~CUB
2	F5_F8_type_C~Cadherin
2	F5_F8_type_C~EGF_CA
2	F5_F8_type_C~Fz
2	F5_F8_type_C~G8
2	F5_F8_type_C~GPS
2	F5_F8_type_C~Gal_Lectin
2	F5_F8_type_C~H_lectin
2	F5_F8_type_C~Kelch_1
2	F5_F8_type_C~Kringle
2	F5_F8_type_C~Laminin_G_2
2	F5_F8_type_C~PKD_channel
2	F5_F8_type_C~PLAT
2	F5_F8_type_C~Pentaxin
2	F5_F8_type_C~Pkinase_Tyr
2	F5_F8_type_C~Ricin_B_lectin
2	F5_F8_type_C~SAM_1
2	F5_F8_type_C~SRCR
2	F5_F8_type_C~VWA
2	F5_F8_type_C~Xlink
2	F5_F8_type_C~Zona_pellucida
2	F5_F8_type_C~fn2
2	F5_F8_type_C~fn3
2	FAD_binding_1~Cyt-b5
2	FAD_binding_2~DUF3585
2	FAD_binding_3~LIM
2	FAD_binding_3~MFS_1
2	FAD_binding_4~Creatininase
2	FAD_binding_4~Cytokin-bind
2	FAD_binding_4~Methyltransf_11
2	FAD_binding_5~Fer2_2
2	FAD_binding_6~NAD_binding_6
2	FAD_binding_8~Ferric_reduct
2	FAD_binding_8~NAD_binding_6
2	FAD_binding_8~RhoGAP
2	FAR1~Peptidase_C48
2	FAR1~SWIM
2	FAT~TPR_1
2	FATC~PfkB
2	FATC~zf-PARP
2	FA_desaturase~Cyt-b5
2	FCH~DEP
2	FCH~GRAM
2	FCH~Pkinase_Tyr
2	FCH~RhoGAP
2	FCH~SH2
2	FCH~Seipin
2	FERM_M~C2
2	FERM_M~PI-PLC-X
2	FERM_M~Talin_middle
2	FERM_M~VHP
2	FERM_M~efhand_like
2	FERM_N~Kinesin
2	FERM_N~Talin_middle
2	FERM_N~VHP
2	FGE-sulfatase~Glycos_transf_1
2	FGF~PLAT
2	FH2~PH
2	FHA~C2
2	FHA~DcpS_C
2	FHA~Drf_FH3
2	FHA~Fork_head
2	FHA~HIRAN
2	FHA~PAP_fibrillin
2	FHA~PTCB-BRCT
2	FHA~Pkinase
2	FHA~RRM_1
2	FHA~SAP
2	FHA~zf-PARP
2	FKBP_C~Apc3
2	FKBP_C~Pro_isomerase
2	FMN_dh~Glu_synthase
2	FOLN~Kazal_1
2	FOLN~Kazal_2
2	FSH1~AMP-binding
2	FYVE~7tm_1
2	FYVE~BTB
2	FYVE~Beta-lactamase
2	FYVE~DNA_ligase_A_C
2	FYVE~DNA_ligase_A_M
2	FYVE~DNA_ligase_A_N
2	FYVE~DUF3480
2	FYVE~DUF500
2	FYVE~FIST_C
2	FYVE~Helicase_C
2	FYVE~Lipase_3
2	FYVE~PI3Ka
2	FYVE~START
2	FYVE~TBC
2	FYVE~ThiF
2	FYVE~UBACT
2	FYVE~UBA_e1_thiolCys
2	FYVE~UIM
2	FYVE~UPF0203
2	FbpA~zf-CCHC
2	FeoB_N~YchF-GTPase_C
2	Fer2~NAD_binding_1
2	Fer2_2~Fer2
2	Fer2_BFD~DUF1667
2	Fer2_BFD~Pyr_redox_2
2	Fer4~DUF3470
2	Fer4_5~Bre5
2	Fer4_7~FAD_binding_1
2	Fer4_7~Flavodoxin_1
2	Fer4_7~NAD_binding_1
2	FerA~C2
2	FerA~FerB
2	Ferric_reduct~RhoGAP
2	Fib_alpha~Fibrinogen_aC
2	Fibrinogen_C~F5_F8_type_C
2	Fibrinogen_C~Lectin_C
2	Fibrinogen_C~PAN_1
2	Fibrinogen_C~Pkinase_Tyr
2	Fibrinogen_C~SRCR
2	Fibrinogen_C~fn3
2	Filamin~MIB_HERC2
2	Filamin~NHL
2	Filamin~SGL
2	FimP~PIG-S
2	Flg_bb_rod~DUF1078
2	Flp_N~Flp_C
2	Flt3_lig~Ribosomal_L13
2	Folate_rec~Cache_1
2	FrhB_FdhB_N~FrhB_FdhB_C
2	Fringe~DUF604
2	Frizzled~DUF74
2	FtsJ~WW
2	FtsK_SpoIIIE~Ftsk_gamma
2	Fumerase~Fumerase_C
2	Fungal_trans~ABC_tran
2	Fungal_trans~Abhydrolase_6
2	Fungal_trans~Exo_endo_phos
2	Fungal_trans~Thioesterase
2	Fungal_trans~adh_short
2	Furin-like~Pkinase_Tyr
2	Fz~Frizzled
2	Fz~GPS
2	Fz~Gal_Lectin
2	Fz~Ldl_recept_a
2	Fz~Lectin_C
2	Fz~REJ
2	Fz~Sushi
2	G-patch~Dehydrin
2	G-patch~WW
2	G10~Na_H_Exchanger
2	G2F~EGF_3
2	G8~CHRD
2	G8~Glyco_hydro_16
2	G8~Lectin_C
2	G8~WSC
2	GAF~DNA_ligase_A_C
2	GAF~DNA_ligase_A_M
2	GAF~DNA_ligase_A_N
2	GAF~Guanylate_cyc
2	GAF~PAS
2	GAF~Pkinase
2	GATA~Fork_head
2	GATA~Proteasom_Rpn13
2	GATase~Anth_synt_I_N
2	GATase~GMP_synt_C
2	GATase~IGPS
2	GATase~PRAI
2	GBA2_N~DUF1793
2	GCC2_GCC3~COesterase
2	GCC2_GCC3~CUB
2	GCC2_GCC3~EGF
2	GCC2_GCC3~EGF_2
2	GCC2_GCC3~F5_F8_type_C
2	GCC2_GCC3~I-set
2	GCC2_GCC3~Pkinase
2	GCC2_GCC3~TIL
2	GCC2_GCC3~TSP_1
2	GCV_T~C6_DPF
2	GDC-P~Beta_elim_lyase
2	GED~Dynamin_M
2	GED~Dynamin_N
2	GFO_IDH_MocA~Biliv-reduc_cat
2	GFO_IDH_MocA_C~GFO_IDH_MocA
2	GHMP_kinases_C~AIRS
2	GHMP_kinases_C~AIRS_C
2	GHMP_kinases_N~GHMP_kinases_C
2	GIT_SHD~GIT1_C
2	GIY-YIG~UvrC_HhH_N
2	GIY-YIG~zf-CCHC
2	GON~F5_F8_type_C
2	GON~VWA
2	GON~WSC
2	GPS~PKD_channel
2	GPS~PLAT
2	GRAM~3-PAP
2	GRAM~Ank_2
2	GRAM~Glyco_transf_28
2	GSDH~PKD
2	GSG-1~PMP22_Claudin
2	GSPII_E~AAA_7
2	GSPII_E~ABC_tran
2	GSPII_E_N~GSPII_E
2	GST_C~Val_tRNA-synt_C
2	GST_C~tRNA-synt_2c
2	GST_C~tRNA_SAD
2	GST_N~Anticodon_1
2	GST_N~tRNA-synt_1
2	GTP_CH_N~GTP_cyclohydro2
2	GTP_EFTU~Chromo
2	GTP_EFTU~Pre-SET
2	GTP_EFTU~SET
2	GTP_EFTU_D2~DUF663
2	GTP_EFTU_D3~GTP_EFTU_D2
2	GTP_cyclohydro2~RibD_C
2	GYF~zf-CCCH
2	Gal-bind_lectin~Pex24p
2	Gal4_dimer~Fungal_trans
2	Gal_Lectin~CUB
2	Gal_Lectin~EGF_CA
2	Gal_Lectin~F5_F8_type_C
2	Gal_Lectin~Lectin_C
2	Gal_Lectin~Sushi
2	Gal_Lectin~TIL
2	Gal_Lectin~TILa
2	Gal_Lectin~hEGF
2	Galactosyl_T~Gb3_synth
2	Galanin~GMAP
2	GlcNAc~Abhydrolase_3
2	Glu-tRNAGln~DUF726
2	Glucan_synthase~MFS_1
2	GlutR_N~GlutR_dimer
2	GlutR_N~Shikimate_DH
2	Glutaminase~Ank_2
2	Glutaredoxin~Pyr_redox_2
2	Glutaredoxin~Pyr_redox_dim
2	Gly-rich_Ago1~Piwi
2	Gly_rich~fn3
2	Gly_transf_sug~Sulphotransf
2	Glyco_hydro_16~Acyl_transf_3
2	Glyco_hydro_17~But2
2	Glyco_hydro_18~CBM_1
2	Glyco_hydro_18~CBM_14
2	Glyco_hydro_18~CBM_19
2	Glyco_hydro_18~ChiC
2	Glyco_hydro_18~Pkinase_Tyr
2	Glyco_hydro_2~Glyco_hydro_2_N
2	Glyco_hydro_30~Ricin_B_lectin
2	Glyco_hydro_31~PRKCSH
2	Glyco_hydro_31~Trefoil
2	Glyco_hydro_32C~Glyco_hydro_32N
2	Glyco_hydro_35~BetaGal_dom2
2	Glyco_hydro_35~Gal_Lectin
2	Glyco_hydro_38~Alpha-mann_mid
2	Glyco_hydro_38~Glyco_hydro_38C
2	Glyco_hydro_43~CBM_1
2	Glyco_hydro_43~F5_F8_type_C
2	Glyco_hydro_43~Glyco_transf_64
2	Glyco_hydro_67M~Glyco_hydro_67C
2	Glyco_hydro_6~CBM_1
2	Glyco_tran_28_C~OTU
2	Glyco_transf_28~ATG_C
2	Glyco_transf_29~Lectin_C
2	Glycos_transf_2~ABC_membrane
2	Glycos_transf_2~ABC_tran
2	Glycos_transf_2~Galactosyl_T_2
2	Glycos_transf_2~Ricin_B_lectin
2	Glycos_transf_N~Glycos_transf_1
2	Glyoxalase~FAD_binding_3
2	Guanylate_cyc~DUF815
2	Guanylate_cyc~FYVE
2	Guanylate_cyc~LIM
2	Guanylate_kin~ADK
2	Guanylate_kin~WW
2	Guanylate_kin~ZU5
2	H2TH~zf-FPG_IleRS
2	HA2~MFS_1
2	HA2~Pkinase
2	HA2~Ribosomal_S24e
2	HAD~Colicin_im
2	HAD~NAD_Gly3P_dh_C
2	HAD~RCC1
2	HAMP~GGDEF
2	HAMP~PAS_3
2	HARP~SNF2_N
2	HATPase_c~CheW
2	HATPase_c~DNA_gyraseB_C
2	HATPase_c~DNA_topoisoIV
2	HATPase_c~GAF
2	HATPase_c~GerE
2	HATPase_c~Guanylate_cyc
2	HATPase_c~HTH_8
2	HATPase_c~PAS_4
2	HATPase_c~Response_reg
2	HCaRG~Glu-tRNAGln
2	HEAT~Vac14_Fab1_bd
2	HECT~Kinesin
2	HECT~Phosphodiest
2	HELP~PLAT
2	HET~MFS_1
2	HET~NB-ARC
2	HHH~DNA_pol_lambd_f
2	HHH_3~F-box-like
2	HHH_3~WD40
2	HH_signal~Cadherin
2	HH_signal~VWA
2	HI0933_like~DAO
2	HLH~Neuro_bHLH
2	HLH~Nuc_rec_co-act
2	HMA~Pyr_redox_dim
2	HMG-CoA_red~APH
2	HMGL-like~DmpG_comm
2	HMGL-like~PYC_OADA
2	HMG_box~Bromodomain
2	HMG_box~DEK_C
2	HMG_box~DUF2028
2	HMG_box~GCN5L1
2	HMG_box~PMD
2	HMG_box~SOXp
2	HNOB~Guanylate_cyc
2	HNOB~HNOBA
2	HR1~PH
2	HR1~Pkinase
2	HRM~GPS
2	HSDR_N~DUF3387
2	HSDR_N~ResIII
2	HSP70~Afi1
2	HSP70~SPB_interacting
2	HTH_11~AsnC_trans_reg
2	HTH_19~Peptidase_S24
2	HTH_3~Peptidase_S24
2	HTH_7~HTH_Tnp_Tc3_2
2	HTH_OrfB_IS605~OrfB_Zn_ribbon
2	HTH_Tnp_1~HTH_Tnp_Tc5
2	HTH_Tnp_IS66~DDE_Tnp_IS66
2	HTH_Tnp_Tc3_2~Ank_2
2	HTH_Tnp_Tc3_2~DDE_1
2	HTH_Tnp_Tc5~Cenp-B_dimeris
2	HTH_Tnp_Tc5~FGGY_N
2	HTH_Tnp_Tc5~zf-C2H2
2	HTH_psq~Aminotran_1_2
2	HYR~EGF_2
2	HYR~Pkinase_Tyr
2	HYR~TSP_1
2	HYR~Trypsin
2	HYR~fn3
2	HbrB~CRAL_TRIO
2	HbrB~RhoGAP
2	He_PIG~SKG6
2	Helicase_C~ABC_tran
2	Helicase_C~Bestrophin
2	Helicase_C~DUF2183
2	Helicase_C~DbpA
2	Helicase_C~HATPase_c
2	Helicase_C~HMG_box
2	Helicase_C~HrpB_C
2	Helicase_C~MFS_1
2	Helicase_C~Myb_DNA-binding
2	Helicase_C~Peptidase_S9
2	Helicase_C~RIG-I_C-RD
2	Helicase_C~RNase_T
2	Helicase_C~Ribosomal_S24e
2	Helicase_C~SH3_1
2	Helicase_C~UCH
2	Helicase_C~UPF0052
2	Helicase_C~Vac14_Fab1_bd
2	Helicase_C~Vac14_Fig4_bd
2	Helicase_C~zf-CW
2	Heme_oxygenase~SAC3_GANP
2	Hemopexin~Peptidase_M10
2	Hexokinase_1~MFS_1
2	Hexokinase_2~MFS_1
2	HhH-GPD~Acetyltransf_1
2	HhH-GPD~CAP
2	HhH-GPD~Myotub-related
2	HisKA~PAS_4
2	HisKA~Response_reg
2	His_Phos_1~GMC_oxred_C
2	His_Phos_1~GMC_oxred_N
2	His_Phos_1~PAN_1
2	His_Phos_1~PPR_1
2	His_Phos_2~FAD_binding_1
2	His_Phos_2~NAD_binding_1
2	His_Phos_2~RUN
2	His_biosynth~PRA-PH
2	His_kinase~HATPase_c
2	Histidinol_dh~HisG_C
2	Histone~DUF59
2	Histone~PH
2	Histone~RasGEF
2	Histone~RasGEF_N
2	Histone~RhoGEF
2	HlyD~ACR_tran
2	HnRNP_M~RRM_1
2	Hom_end~PROCT
2	Hom_end~PRP8_domainIV
2	Hom_end~U6-snRNA_bdg
2	Homeobox~CASP_C
2	Homeobox~DDT
2	Homeobox~Pkinase
2	Homeobox~TF_Otx
2	Homeobox~TRAM_LAG1_CLN8
2	Hormone_recep~zf-C4
2	HpaB_N~HpaB
2	HsdM_N~N6_Mtase
2	Hyd_WA~CUB
2	Hydant_A_N~Hydantoinase_B
2	Hydantoinase_A~Hydantoinase_B
2	Hydrolase~ATP_Ca_trans_C
2	Hydrolase~Abhydrolase_1
2	Hydrolase~GMC_oxred_C
2	Hydrolase~GMC_oxred_N
2	Hydrolase~HMA
2	Hydrolase~NicO
2	Hydrolase~Redoxin
2	I-set~7tm_2
2	I-set~Alpha_kinase
2	I-set~CUB
2	I-set~DB
2	I-set~DOMON
2	I-set~EpoR_lig-bind
2	I-set~G2F
2	I-set~HYR
2	I-set~ITAM
2	I-set~LRR_4
2	I-set~Neogenin_C
2	I-set~Neuregulin
2	I-set~PAN_1
2	I-set~PH
2	I-set~Pentaxin
2	I-set~SEA
2	I-set~Titin_Z
2	I-set~Trypsin
2	I-set~Y_phosphatase
2	I-set~Zona_pellucida
2	IBN_N~Dopey_N
2	ICAM_N~I-set
2	ICAT~Cadherin
2	IDO~Cyt-b5
2	IDO~FAD_binding_1
2	IDO~NAD_binding_1
2	IF2_N~IF2_assoc
2	IFP_35_N~NID
2	IGFBP~Cys_knot
2	IGFBP~Kazal_1
2	IGFBP~Kazal_2
2	IGFBP~TSP_1
2	IL1_propep~IL1
2	IL6Ra-bind~fn3
2	IMD~SH3_2
2	ING~DUF1325
2	IPT~IPPT
2	IP_trans~DDHD
2	IP_trans~LNS2
2	IQ~Ank_2
2	IQ~BAG
2	IQ~LRR_4
2	IQ~SH2
2	IQ~WW
2	IRS~I_LWEQ
2	IRS~Talin_middle
2	I_LWEQ~VHP
2	Ig_Tie2_1~Pkinase_Tyr
2	Ig_Tie2_1~fn3
2	Inhibitor_I9~DUF1034
2	Inositol_P~EXS
2	Ins145_P3_rec~RyR
2	Ins145_P3_rec~SPRY
2	Ins145_P3_rec~efhand
2	Insulin~IGF2_C
2	Interfer-bind~Tissue_fac
2	Interfer-bind~fn3
2	Involucrin_N~Involucrin2
2	Ion_trans~DASH_Dad4
2	Ion_trans~DUF3399
2	Ion_trans~Guanylate_cyc
2	Ion_trans~LRR_4
2	Ion_trans~MFS_1
2	Ion_trans~Na_trans_assoc
2	Ion_trans~Pkinase
2	Ion_trans~TRP_2
2	Ion_trans_2~Ion_trans
2	Ion_trans_2~KCNQC3-Ank-G_bd
2	Ion_trans_2~Pkinase
2	Iso_dh~Isochorismatase
2	Iso_dh~efhand
2	Isochorismatase~Amidase
2	IspD~adh_short
2	Isy1~Nexin_C
2	Isy1~PX
2	Isy1~RGS
2	JmjN~JmjC
2	KH_1~DUF1771
2	KH_1~DnaJ
2	KH_1~FXR1P_C
2	KH_1~HD
2	KH_1~SAM_1
2	KH_1~Smr
2	KH_1~TUDOR
2	KH_1~zf-RanBP
2	KIP1~FMO-like
2	KIX~Bromodomain
2	KIX~DUF902
2	KIX~KAT11
2	KIX~ZZ
2	KIX~zf-TAZ
2	KOW~CRAL_TRIO
2	KR~ADH_N
2	KR~Chal_sti_synt_C
2	KR~Chal_sti_synt_N
2	KTI12~Smr
2	K_tetra~MFS_1
2	K_tetra~SPRY
2	Kazal_1~Kunitz_BPTI
2	Kazal_1~PDZ
2	Kazal_2~Laminin_EGF
2	Kazal_2~SPARC_Ca_bdg
2	Kelch_1~AAA_6
2	Kelch_1~AAA_7
2	Kelch_1~AAA_8
2	Kelch_1~DEAD
2	Kelch_1~DHC_N2
2	Kelch_1~EGF_2
2	Kelch_1~EGF_3
2	Kelch_1~EGF_CA
2	Kelch_1~F-box
2	Kelch_1~RhoGAP
2	Kelch_1~SAM_1
2	Kelch_1~fn3
2	Kelch_1~zf-rbx1
2	Kelch_2~DUF827
2	Kelch_2~DUF947
2	Kelch_2~K-box
2	Ketoacyl-synt_C~Chal_sti_synt_C
2	Ketoacyl-synt_C~Chal_sti_synt_N
2	Kinesin~Ank
2	Kinesin~Ank_2
2	Kinesin~DIL
2	Kinesin~Exo_endo_phos
2	Kinesin~HHH
2	Kinesin~RRM_1
2	Kinesin~Ras
2	Kinesin~Ribosomal_L18e
2	Kinesin~START
2	Kinesin~cNMP_binding
2	Kri1~Kri1_C
2	Kri1~ZZ
2	Kringle~7tm_1
2	Kringle~7tm_2
2	Kringle~CUB
2	Kringle~Cadherin
2	Kringle~EGF_CA
2	Kringle~G8
2	Kringle~GPS
2	Kringle~Gal_Lectin
2	Kringle~I-set
2	Kringle~LRR_4
2	Kringle~Methyltransf_FA
2	Kringle~PKD_channel
2	Kringle~PLAT
2	Kringle~Pentaxin
2	Kringle~REJ
2	Kringle~Somatomedin_B
2	Kringle~VWD
2	Kunitz_BPTI~C8
2	Kunitz_BPTI~Kazal_2
2	Kunitz_BPTI~Lectin_C
2	Kunitz_BPTI~Pacifastin_I
2	Kunitz_BPTI~TSP_1
2	Kunitz_BPTI~Tyrosinase
2	Kunitz_BPTI~VWD
2	L27~SH3_2
2	L27_1~PDZ_assoc
2	LBR_tudor~ERG4_ERG24
2	LCCL~EGF_CA
2	LCCL~Lectin_C
2	LCCL~SRCR
2	LCCL~Trypsin
2	LCM~Acetyltransf_1
2	LDB19~Arrestin_C
2	LEA_2~zf-rbx1
2	LEM~Ank
2	LIM~BTB
2	LIM~C2
2	LIM~CH
2	LIM~DUF3633
2	LIM~PH
2	LIM~PX
2	LIM~RGS
2	LIM~RhoGAP
2	LMBR1~BAG
2	LRRNT~An_peroxidase
2	LRRNT~GPS
2	LRRNT~Pkinase_Tyr
2	LRRNT~WSC
2	LRRNT_2~Pkinase
2	LRRNT_2~Pkinase_Tyr
2	LRRNT_2~S1FA
2	LRR_3~NB-ARC
2	LRR_3~TIR
2	LRR_4~Drf_FH3
2	LRR_4~F5_F8_type_C
2	LRR_4~Filamin
2	LRR_4~Glycos_transf_1
2	LRR_4~Guanylate_cyc
2	LRR_4~Lectin_C
2	LRR_4~NTF2
2	LRR_4~PDZ
2	LRR_4~PH
2	LRR_4~PRKCSH
2	LRR_4~Peptidase_C14
2	LRR_4~Peptidase_S8
2	LRR_4~RRM_1
2	LRR_4~RasGEF
2	LRR_4~RasGEF_N
2	LRR_4~SAP
2	LRR_4~Sushi
2	LRR_4~TSP_C
2	LRR_4~WSC
2	LRR_4~fn3
2	LZ_Tnp_IS66~HTH_Tnp_IS66
2	Lactamase_B~Beta-Casp
2	Lactamase_B~CPSF73-100_C
2	Lactamase_B~Lactamase_B_2
2	Lactamase_B~RMMBL
2	Lactamase_B~Rhodanese
2	Lactamase_B~SCP2
2	Lactamase_B_2~DRMBL
2	Lactamase_B_2~Pkinase
2	Laminin_B~Ldl_recept_a
2	Laminin_B~ig
2	Laminin_EGF~CUB
2	Laminin_EGF~Calx-beta
2	Laminin_EGF~EGF
2	Laminin_EGF~EGF_3
2	Laminin_EGF~Ldl_recept_a
2	Laminin_EGF~SEA
2	Laminin_EGF~VWA
2	Laminin_EGF~fn3
2	Laminin_EGF~ig
2	Laminin_G_1~Laminin_G_2
2	Laminin_G_2~7tm_2
2	Laminin_G_2~Calx-beta
2	Laminin_G_2~DUF3497
2	Laminin_G_2~EGF_2
2	Laminin_G_2~HRM
2	Laminin_G_2~Laminin_N
2	Laminin_G_2~Pkinase_Tyr
2	Laminin_G_2~TSP_1
2	Laminin_G_2~TSP_C
2	Laminin_G_2~VWA
2	Laminin_I~Laminin_G_1
2	Laminin_I~Laminin_G_2
2	Laminin_II~Laminin_G_1
2	Laminin_N~Laminin_I
2	Ldl_recept_a~7tm_2
2	Ldl_recept_a~ASC
2	Ldl_recept_a~CAP
2	Ldl_recept_a~CUB
2	Ldl_recept_a~Cys_knot
2	Ldl_recept_a~EGF
2	Ldl_recept_a~EGF_3
2	Ldl_recept_a~I-set
2	Ldl_recept_a~Kringle
2	Ldl_recept_a~Laminin_G_1
2	Ldl_recept_a~Somatomedin_B
2	Ldl_recept_a~Trypsin
2	Ldl_recept_a~VWA
2	Ldl_recept_a~Zona_pellucida
2	Ldl_recept_a~cEGF
2	Ldl_recept_a~zf-C2H2
2	Ldl_recept_b~EGF_3
2	Ldl_recept_b~GCC2_GCC3
2	Ldl_recept_b~HYR
2	Ldl_recept_b~I-set
2	Ldl_recept_b~SEA
2	Ldl_recept_b~SRCR
2	Ldl_recept_b~Trypsin
2	Ldl_recept_b~hEGF
2	Lectin_C~7tm_1
2	Lectin_C~Astacin
2	Lectin_C~C8
2	Lectin_C~Collagen
2	Lectin_C~Cyclase
2	Lectin_C~DUF3504
2	Lectin_C~I-set
2	Lectin_C~Kunitz_BPTI
2	Lectin_C~MAM
2	Lectin_C~Methyltransf_FA
2	Lectin_C~PA
2	Lectin_C~PKD
2	Lectin_C~PKD_channel
2	Lectin_C~PLAT
2	Lectin_C~Pentaxin
2	Lectin_C~REJ
2	Lectin_C~ShK
2	Lectin_C~Somatomedin_B
2	Lectin_C~Sushi
2	Lectin_C~TIL
2	Lectin_C~TILa
2	Lectin_C~VWD
2	Lectin_C~WD40
2	Lectin_C~Xlink
2	Lectin_N~Lectin_C
2	Lep_receptor_Ig~EpoR_lig-bind
2	Lep_receptor_Ig~IL6Ra-bind
2	Lig_chan~ANF_receptor
2	Lig_chan~CaM_bdg_C0
2	Lig_chan~Lig_chan-Glu_bd
2	Lig_chan~SBP_bac_3
2	Limkain-b1~RRM_1
2	Linker_histone~Histone
2	Lipase_3~DSPc
2	Lipase_GDSL~Glyco_hydro_18
2	LrgA~LrgB
2	Lum_binding~DMRL_synthase
2	Ly49~Lectin_C
2	LysM~Pkinase_Tyr
2	Lysyl_oxidase~SRCR
2	MAAL_N~MAAL_C
2	MACPF~Kazal_2
2	MAGUK_N_PEST~SH3_2
2	MAM~Fibrinogen_C
2	MAM~I-set
2	MAM~PKD_channel
2	MAM~ShK
2	MAM~Sushi
2	MAM~TSP_1
2	MAM~Y_phosphatase
2	MAM~Zona_pellucida
2	MANEC~Ldl_recept_a
2	MAR_sialic_bdg~GCC2_GCC3
2	MASE1~HATPase_c
2	MASE1~HisKA
2	MASE1~Response_reg
2	MATH~LSM
2	MBT~Miro
2	MBT~Ras
2	MENTAL~ABC_membrane
2	MENTAL~START
2	MFS_1~2OG-FeII_Oxy
2	MFS_1~DnaJ_C
2	MFS_1~HET
2	MFS_1~Helicase_C
2	MFS_1~LRR_4
2	MFS_1~MFS_1_like
2	MFS_1~NACHT
2	MFS_1~Nuc_H_symport
2	MFS_1~PDR_CDR
2	MFS_1~PUCC
2	MFS_1~Pkinase_Tyr
2	MFS_1~RRM_1
2	MFS_1~SNF2_N
2	MFS_1~UDPGT
2	MFS_1~WD40
2	MFS_1~Zn_clus
2	MFS_1~p450
2	MF_alpha_N~MF_alpha
2	MG1~A2M_N
2	MGDG_synth~Glyco_tran_28_C
2	MHC2-interact~Thyroglobulin_1
2	MHCassoc_trimer~Thyroglobulin_1
2	MHYT~PAS
2	MIB_HERC2~Phosphodiest
2	MIF4G~Pkinase
2	MIF4G~W2
2	MIG-14_Wnt-bd~Lipase_3
2	MIP-T3~RRM_1
2	MIR~efhand
2	MIT~Chitin_synth_1
2	MIT~Chitin_synth_1N
2	MIT~Vps4_C
2	MMR_HSR1~CDP-OH_P_transf
2	MMR_HSR1~CS
2	MMR_HSR1~DnaJ
2	MMR_HSR1~GTP_EFTU
2	MMR_HSR1~HSCB_C
2	MMR_HSR1~Hint
2	MMR_HSR1~NOG1
2	MMR_HSR1~PduV-EutP
2	MMR_HSR1~SGS
2	MM_CoA_mutase~B12-binding
2	MNNL~Pacifastin_I
2	MORN~Pkinase_Tyr
2	MOSC~3-alpha
2	MOSC~FAD_binding_6
2	MOSC~NAD_binding_1
2	MP~Peptidase_A3
2	MRG~DSPc
2	MRP~Sad1_UNC
2	MR_MLE~MAAL_C
2	MR_MLE_N~MAAL_C
2	MT-A70~Adenine_glyco
2	MTS~Aminotran_1_2
2	MULE~PHD
2	MULE~UCH
2	MaoC_dehydratas~ACPS
2	MaoC_dehydratas~Acyl_transf_1
2	MaoC_dehydratas~SCP2
2	MarR~AsnC_trans_reg
2	Mating_N~Homeobox_KN
2	Mating_N~Mating_C
2	Mcp5_PH~DZC
2	Mcp5_PH~FYVE
2	Med25_SD1~Med25_NR-box
2	Med26~Elongin_A
2	Med26~TFIIS_C
2	Mem_trans~Rib_5-P_isom_A
2	Metalloenzyme~iPGM_N
2	Metallophos~DREV
2	Metallophos~DUF2433
2	Metallophos~PTH2
2	Metallophos~Ribonuclease_3
2	Methyltransf_11~HIG_1_N
2	Methyltransf_11~Helicase_C
2	Methyltransf_11~Methyltransf_14
2	Methyltransf_11~PP-binding
2	Methyltransf_11~Rhodanese
2	Methyltransf_11~SNF2_N
2	Methyltransf_12~Methyltransf_16
2	Methyltransf_12~NAD_binding_4
2	Methyltransf_16~Pkinase
2	Methyltransf_16~zf-MYND
2	Methyltransf_18~Condensation
2	Methyltransf_18~Dala_Dala_lig_C
2	Methyltransf_2~FAD_binding_3
2	Methyltransf_2~GST_C
2	Methyltransf_2~zf-C3HC4
2	Methyltransf_4~Nexin_C
2	Methyltransf_4~PX
2	Methyltransf_4~PXA
2	Methyltransf_4~RGS
2	Methyltransf_FA~BACK
2	Methyltransf_FA~Lectin_C
2	Methyltransf_FA~Neur_chan_LBD
2	Methyltransf_FA~Neur_chan_memb
2	Methyltransf_FA~VWD
2	Methyltransf_FA~WSC
2	Mg_chelatase~VWA
2	MinC_N~MinC_C
2	Miro~Ank
2	Miro~ArfGap
2	Miro~WD40
2	Misat_Myo_SegII~Tubulin_C
2	Mlo~efhand
2	MobB~DUF663
2	MoeA_C~MoCF_biosynth
2	Molybdop_Fe4S4~Molydop_binding
2	Motile_Sperm~Pkinase_Tyr
2	Mov34~DPBB_1
2	Mt_ATP-synt_B~Elf1
2	Mu-like_Com~zf-CHY
2	MutS_I~MutS_II
2	Myb_DNA-binding~AP2
2	Myb_DNA-binding~DIRP
2	Myb_DNA-binding~GATA
2	Myb_DNA-binding~PHD
2	Myb_DNA-binding~PP2C
2	Myb_DNA-binding~P_C
2	Myb_DNA-binding~TTL
2	Myosin_head~Ank
2	Myosin_head~Ank_2
2	Myosin_head~Chitin_synth_2
2	Myosin_head~Mcp5_PH
2	Myosin_head~Miro
2	Myosin_head~PDZ
2	Myosin_head~PH
2	Myosin_head~RUN
2	Myosin_head~SAM_2
2	Myosin_head~ThiF
2	Myosin_head~UBACT
2	Myosin_head~UBA_e1_thiolCys
2	Myosin_head~WD40
2	Myotub-related~DUF3661
2	Myotub-related~FYVE
2	Myotub-related~Glycos_transf_1
2	N1221~DUF3402
2	NACHT~CARD
2	NACHT~Death
2	NACHT~GAF
2	NACHT~HATPase_c
2	NACHT~HisKA
2	NACHT~PIF1
2	NACHT~Pentapeptide
2	NACHT~Pkinase_Tyr
2	NACHT~Response_reg
2	NACHT~ZZ
2	NADH-G_4Fe-4S_3~Fer4_7
2	NADH-u_ox-rdase~NADH_u_ox_C
2	NADPH_Ox~efhand
2	NAD_binding_3~ACT
2	NAD_binding_3~SAF
2	NAD_binding_4~Aminotran_5
2	NAD_binding_4~SKI
2	NAD_binding_6~RhoGAP
2	NB-ARC~Ank
2	NB-ARC~Ank_2
2	NB-ARC~DUF640
2	NB-ARC~FNIP
2	NB-ARC~GAF
2	NB-ARC~HATPase_c
2	NB-ARC~HisKA
2	NB-ARC~Response_reg
2	NB-ARC~zf-BED
2	NDK~IQ
2	NHL~Pkinase
2	NHL~SGL
2	NHL~TIG
2	NIDO~C8
2	NIDO~EGF_3
2	NIDO~G2F
2	NIDO~Lectin_C
2	NIDO~SEA
2	NIDO~TIL
2	NIDO~TILa
2	NIDO~Zona_pellucida
2	NIDO~cEGF
2	NIDO~fn3
2	NIDO~hEGF
2	NOT2_3_5~CUE
2	NOT2_3_5~PALP
2	NTP_transf_2~zf-CCHC
2	NTP_transferase~Hydrolase_3
2	NUC130_3NT~SDA1
2	NUDIX~IF-2B
2	NUDIX~Metallophos
2	NUDIX~Ocnus
2	NUDIX~Pkinase
2	NUDIX~W2
2	NUDIX~zf-CCCH
2	NUMOD4~AP2
2	NYN~RRM_1
2	N_methyl~GSPII_G
2	N_methyl~Pilin
2	Na_H_Exchanger~NuA4
2	Na_H_Exchanger~TrkA_N
2	Na_trans_assoc~Ion_trans
2	Neuralized~Pkinase
2	Neuralized~Pkinase_Tyr
2	NfI_DNAbd_pre-N~MH1
2	NmrA~Epimerase
2	NmrA~Sugar_tr
2	Nol1_Nop2_Fmu~P120R
2	Nop53~B2-adapt-app_C
2	Nop53~RNase_T
2	Not3~PALP
2	Notch~Peptidase_M43
2	NtA~Kazal_1
2	NtA~Laminin_EGF
2	Nuc_sug_transp~Gly_transf_sug
2	Nucleoporin_C~Actin
2	Nucleoporin_N~Actin
2	Nucleoside_tran~DUF1011
2	Nup188~DUF3414
2	NusG~SAP
2	OAS1_C~ubiquitin
2	OB_NTP_bind~MFS_1
2	ODC_AZ~DUF1771
[truncated: 7,346 more rows]
